# Supplementary material for: Framework-Flexibility Driven Selective Sorption of p-Xylene over Other Isomers by a Dynamic Metal-Organic Framework
Source: PubMed Central journal article supplement — Sci Rep. 2014 Jul 21;4:5761. doi: 10.1038/srep05761 (PMC4104396; doi:10.1038/srep05761), 2014-07-21
Supplement: srep05761-s1.pdf [file srep05761-s1.pdf]

---

Supplementary Information for

# Framework-Flexibility Driven Selective Sorption of *p*-Xylene Over Other Isomers by a Dynamic Metal-Organic Framework

*Soumya Mukherjee, Biplab Joarder, Biplab Manna, Aamod V. Desai, Abhijeet K. Chaudhari and Sujit K. Ghosh \**

Indian Institute of Science Education and Research (IISER), Dr. Homi Bhabha Road, Pashan, Pune-411008, India

Tel: +91-20-2590 8076; Fax: +91-20-2590 8186; E-mail: [sghosh@iiserpune.ac.in](mailto:sghosh@iiserpune.ac.in)

---

## Table of Contents

|                                                                                                | Page no. |
|------------------------------------------------------------------------------------------------|----------|
| Figure S1: Ligand Synthesis scheme                                                             | S6       |
| Figure S2: <sup>1</sup> H NMR Spectrum of Intermediate L'                                      | S8       |
| Figure S3: <sup>13</sup> C NMR Spectrum of Intermediate L'                                     | S8       |
| Figure S4: HRMS Spectrum of Intermediate L'                                                    | S9       |
| Figure S5: <sup>1</sup> H NMR Spectrum of Ligand LH <sub>2</sub>                               | S9       |
| Figure S6: <sup>13</sup> C NMR Spectrum of Ligand LH <sub>2</sub>                              | S10      |
| Figure S7: HRMS Spectrum of Ligand LH <sub>2</sub>                                             | S10      |
| Figure S8: Asymmetric Units of phases 1D <sub>G</sub> and 1                                    | S11      |
| Figure S9: Microscopy images of crystalline phases 1D <sub>G</sub> and 1                       | S11      |
| Figure S10: Progression of a single 2D-sheet (along <i>c</i> -axis) for 1D <sub>G</sub>        | S12      |
| Figure S11: Single 2D-sheets for the phases 1D <sub>G</sub> and 1                              | S12      |
| Figure S12: Perspective view along <i>c</i> -axis for the as-synthesized phase 1D <sub>G</sub> | S13      |

|                                                                                                                         |            |                |
|-------------------------------------------------------------------------------------------------------------------------|------------|----------------|
| <b>Figure S13: Perspective view along <i>a</i>-axis for 1⊃G and 1</b>                                                   | <b>S11</b> | <b>S13</b>     |
| <b>Figure S14: TGA plot for compounds 1⊃G and 1</b>                                                                     |            | <b>S14</b>     |
| <b>Figure S15: TGA plots for solvent exposed samples (all xylenes)</b>                                                  |            | <b>S14</b>     |
| <b>Figure S16: TGA plots for solvent exposed samples (other than xylenes)</b>                                           |            | <b>S15</b>     |
| <b>Figure S17: TGA plots for the desolvated phase 1, 1⊃PX, 1⊃PX' and 1'</b>                                             |            | <b>S15</b>     |
| <b>Figure S18: VT- PXRD data for compound 1⊃G</b>                                                                       |            | <b>S16</b>     |
| <b>Figure S19-22: PXRD patterns for 1⊃G, 1 and solvent exposed samples</b>                                              |            | <b>S17-S20</b> |
| <b>Figure S23: Powder X-ray diffraction (PXRD) patterns for 1⊃G, 1, 1⊃PX, 1⊃MX/OX, 1⊃MX/PX, 1⊃PX/OX, and 1⊃PX/MX/OX</b> |            | <b>S21</b>     |
| <b>Figure S24: CO<sub>2</sub>/N<sub>2</sub> sorption isotherm</b>                                                       |            | <b>S22</b>     |
| <b>Figure S25: CO<sub>2</sub>/CH<sub>4</sub> and CO<sub>2</sub>/H<sub>2</sub> sorption isotherms</b>                    |            | <b>S22</b>     |
| <b>Figure S26: CO<sub>2</sub>/Ar sorption isotherm</b>                                                                  |            | <b>S23</b>     |
| <b>Figure S27: CO<sub>2</sub> sorption isotherms at 273 and 298K</b>                                                    |            | <b>S23</b>     |
| <b>Figure S28: Pore size distribution plot (H-K Plot)</b>                                                               |            | <b>S24</b>     |
| <b>Figure S29: FT-IR spectra of LH<sub>2</sub>, 1⊃G and 1</b>                                                           |            | <b>S24</b>     |
| <b>Figure S30: Solvent sorption isotherms (BZ, TL, PX and CY) at 298K</b>                                               |            | <b>S25</b>     |
| <b>Figure S31: Solvent sorption isotherms (PX, MX and OX) at 298K</b>                                                   |            | <b>S26</b>     |
| <b>Figure S32: <sup>13</sup>C NMR spectrum for 1⊃PX/MX, 1⊃MX/PX and 1⊃MX/OX</b>                                         |            | <b>S27</b>     |
| <b>Figure S33: <sup>13</sup>C NMR spectra of compound 1⊃PX</b>                                                          |            | <b>S28</b>     |
| <b>Table S1: Dimensions of Adsorptive molecules</b>                                                                     |            | <b>S28</b>     |
| <b>Figure S34: Reproducibility of PX sorption isotherm</b>                                                              |            | <b>S29</b>     |
| <b>Figure S35: Bar diagram representation of the PX-sorption reproducibility</b>                                        |            | <b>S30</b>     |
| <b>Figure S36: Reproducibility of MX sorption isotherm</b>                                                              |            | <b>S31</b>     |

|                                                                              |                 |
|------------------------------------------------------------------------------|-----------------|
| <b>Figure S37: Reproducibility of OX sorption isotherm</b>                   | <b>S32</b>      |
| <b>Figure S38: Reproducibility of EB sorption isotherm</b>                   | <b>S33</b>      |
| <b>Figure S39: PXRD patterns for PX recyclability experiments</b>            | <b>S34</b>      |
| <b>Figure S40: PXRD patterns for MX, OX and EB recyclability experiments</b> | <b>S35</b>      |
| <b>GC Instrumentation: Materials and Methods</b>                             | <b>S36</b>      |
| <b>Crystallographic data tables</b>                                          | <b>S37-S102</b> |
| <b>References</b>                                                            | <b>S103</b>     |

## **Experimental Section:**

**Materials:** All the reagents and solvents were commercially available and used as received, without further purification.

**Synthesis of  $\{[\text{Zn}_4\text{O}(\text{L})_3(\text{DMF})_2] \cdot x\text{G}\}_n$  (**1** $\supset$ **G**):** A mixture of  $\text{H}_2\text{L}$  (40 mg, 0.1 mmol),  $\text{Zn}(\text{NO}_3)_2 \cdot 6\text{H}_2\text{O}$  (29.7 mg, 0.1 mmol), DMF (1 mL) and 1-butanol (1 mL) was placed in a teflon capped glass vial. This was heated at 90 °C for 48h and then cooled to room temperature for 1day. Growth of colorless block-shaped crystals was observed upon cooling to RT, the desired product **1** $\supset$ **G** appeared in ~ 72% yield.

Dehydrated phase  $\text{Zn}_4\text{O}(\text{L})_3$  (**1**): Shiny single crystals of **1** $\supset$ **G** were heated at 160 °C under reduced pressure for 8h, to obtain the slightly pale colorless dehydrated crystals of compound **1**.

Resolvated phase  $\{[\text{Zn}_4\text{O}(\text{L})_3(\text{DMF})_2] \cdot (\text{C}_8\text{H}_{10})\}_n$  (**1** $\supset$ **PX'**): Colorless Single Crystals of **1** $\supset$ **PX'** were obtained on exposing the crystals of **1** to the vapor of a solution of *p*-Xylene (2 mL) and DMF (1 mL) for 72h, without allowing any disturbance of the system.

**Physical measurements:** Powder X-ray diffraction (PXRD) patterns were measured on Bruker D8 Advanced X-Ray diffractometer at room temperature using Cu-K $\alpha$  radiation ( $\lambda = 1.5406 \text{ \AA}$ ) with a scan speed of  $0.5^\circ \text{ min}^{-1}$  and a step size of  $0.01^\circ$  in  $2 \theta$ . Thermogravimetric analysis results were obtained in the temperature range of 30-600 °C on Perkin-Elmer STA 6000 analyzer under  $\text{N}_2$  atmosphere, at a heating rate of  $10^\circ \text{ C min}^{-1}$ . The Fourier transform (FT-IR) infra-red spectra were recorded on NICOLET 6700 FT-IR Spectrophotometer using KBr Pellets.

**X-ray Structural Studies:** Single-crystal X-ray data of compound **1** $\supset$ **G** and **1** were collected at 200K on a Bruker KAPPA APEX II CCD Duo diffractometer (operated at 1500 W power: 50 kV, 30 mA) using graphite-monochromated Mo K $\alpha$  radiation ( $\lambda = 0.71073 \text{ \AA}$ ), mounting on nylon CryoLoops (Hampton Research) with Paraton-N (Hampton Research) oil. Single-crystal X-Ray data of compound **1** $\supset$ **PX'** crystals was collected at 100K on a Bruker KAPPA APEX II CCD Duo diffractometer (operated at 1500 W power: 50 kV, 1 mA) using graphite-monochromated Cu K $\alpha$  radiation ( $\lambda = 1.5418 \text{ \AA}$ ), mounting on nylon CryoLoop (Hampton Research) with Paraton-N (Hampton Research) oil. The data integration and reduction were processed with SAINT<sup>[S2]</sup> software. A multi-scan absorption correction was applied to the collected reflections. The structures were solved by the direct method using SHELXTL<sup>[S3]</sup> and were refined on  $F^2$  by full-matrix least-squares technique using the SHELXL-97<sup>[S4]</sup> program

package within the WINGX<sup>[S5]</sup> programme. All non-hydrogen atoms were refined anisotropically. All hydrogen atoms were located in successive difference Fourier maps and they were treated as riding atoms using SHELXL default parameters. The structures were examined using the *Adsym* subroutine of PLATON<sup>[S6]</sup> to assure that no additional symmetry could be applied to the models. Tables S1, S2 and S3 contain crystallographic data for the compounds **1DG**, **1** and **1DPX** respectively.

**Low Pressure Gas Sorption Measurements:-** Low pressure gas and solvent sorption measurements were performed using BelSorpmax (Bel Japan). The sorption-recyclability experiments were recorded in BelAqua (Bel Japan). All the gases used were of 99.999% purity. As-synthesized crystals of compound **1DG** were heated at 180 °C under vacuum for 24 h, to get guest-free crystals of compound **1**. Prior to adsorption measurement, the guest free sample **1** was pretreated at 170 °C under vacuum for 2 h, using BelPrepvacII, and purged with N<sub>2</sub> on cooling.

**Solvent exposure study:** Crystalline solid powder of compound **1** taken in smaller glass vials were kept open inside larger capped closed glass vials containing different guest solvents (benzene, toluene, cyclohexane, *o*-xylene, *m*-xylene and *p*-xylene respectively) over a period of 48h to allow vapor-phase exposure of solvents and characterized by PXRD.

**Synthesis of ligand ( $H_2L$ ):-** The asymmetric dicarboxylic acid ligand 4,4'-((4-(tert-butyl)-1,2-phenylene)bis(oxy))dibenzoic acid ( $H_2L$ ) is synthesized in two steps according to the following reaction protocol:

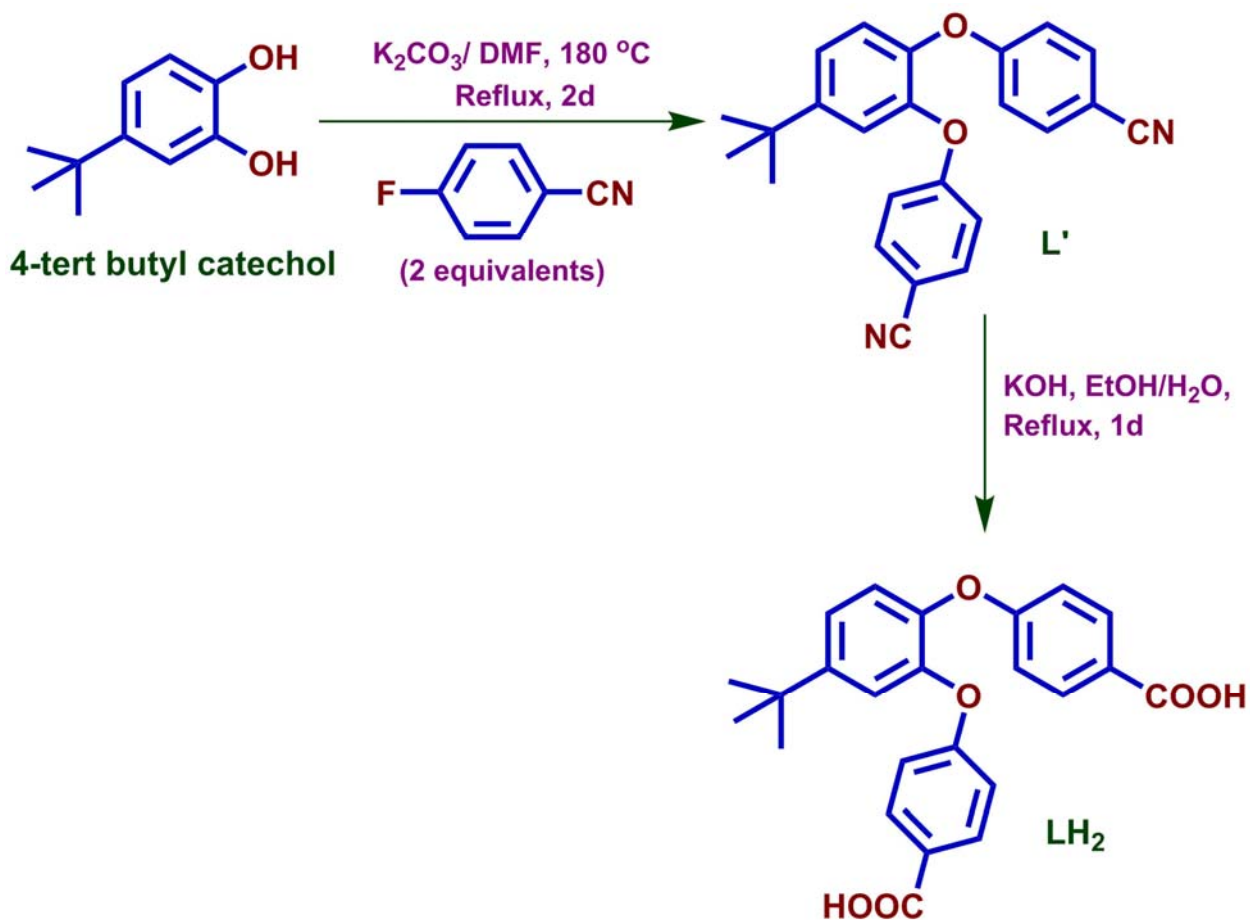

**Figure S1:** Synthesis of ligand  $LH_2$  via intermediate  $L'$ .

**Synthesis of Intermediate  $L'$ .** 4-tert-butyl catechol (11 g, 0.0662 mole), 4-fluorobenzonitrile (16.029 g, 0.1324 mole) and potassium carbonate (~27.6 g, 0.2 mole) were refluxed at  $180\text{ }^\circ\text{C}$  in a mixture of N, N-dimethylformamide (DMF) and *p*-xylene (110 mL/55ml) for 2days. After cooling the reaction mixture to r.t., it was poured into ~100mL ice-cold water, followed by acidification with dil. HCl until pH~3. The reaction mixture was evaporated to dryness (maximum amount as possible) by rotary evaporation under reduced pressure, to get a reddish yellow product. This was extracted with Ethyl acetate ( $2 \times 250\text{mL}$ ), washed with brine/water

(twice each) and the resultant EtOAc layer was dried over anhydrous  $\text{Na}_2\text{SO}_4$ . Evaporation of this EtOAc layer, followed by drying under high vacuum yielded the intermediate compound L'.

Yield: 23.28 g, 95.48%.  $^1\text{H}$  NMR (400 MHz,  $\text{CDCl}_3$ )  $\delta$ (ppm): 7.55-7.51 (m, 4H), 7.33 (dd,  $J=8.24$  Hz,  $J=2.28$  Hz, 1H), 7.22 (d,  $J=2.28$ Hz, 1H), 7.14 (d,  $J=8.28$ Hz, 1H), 6.82-6.77 (m, 4H), 1.34 (s, 9H) ;  $^{13}\text{C}$  NMR (100 MHz,  $\text{CDCl}_3$ )  $\delta$ (ppm) : 161.1, 151.2, 145.2, 143.4, 134.2, 124.21, 122.9, 120.7, 119, 116.8, 106, 35, 31.5 ; HRMS (ESI) Calcd. for  $\text{C}_{24}\text{H}_{20}\text{N}_2\text{O}_2$  369.160  $[\text{M}+\text{H}]^+$ , found 369.160 (Figures S3, S4 and S5).

**Synthesis of ligand  $\text{LH}_2$ .** A mixture of L' (10g, 0.0271 mole) and potassium hydroxide (9.138g, 0.163 mole) was refluxed in 200 mL water/ ethanol (1:1) solvent mixture for 1day. After the reaction mixture was allowed to cool to r.t., it was acidified by dil. HCl keeping on an ice bath till pH~1. The crude material that precipitated out was recrystallized from hot EtOH/water to get colorless crystalline product  $\text{LH}_2$ .

Yield: 9.56 g, 86.66%.  $^1\text{H}$  NMR (400 MHz,  $\text{DMSO-d}_6$ )  $\delta$ (ppm):7.87-7.84 (m, 4H), 7.36 (dd,  $J=8.7$  Hz,  $J=2.28$  Hz, 1H), 7.30 (d,  $J=2.28$ Hz, 1H), 7.22 (d,  $J=8.68$ Hz, 1H),6.87-6.83 (m, 4H), 1.29 (s, 9H) ;  $^{13}\text{C}$  NMR (100 MHz,  $\text{DMSO-d}_6$ )  $\delta$ (ppm): 167.1, 161.0, 150, 145.5, 144, 131.9, 125.3, 123.8, 122.6, 120.5, 116.4, 34.8, 31.4 : HRMS (ESI) Calcd. for  $\text{C}_{24}\text{H}_{22}\text{O}_6$  429.131 $[\text{M}+\text{Na}]^+$ , found 429.130 (Figures S6, S7 and S8).

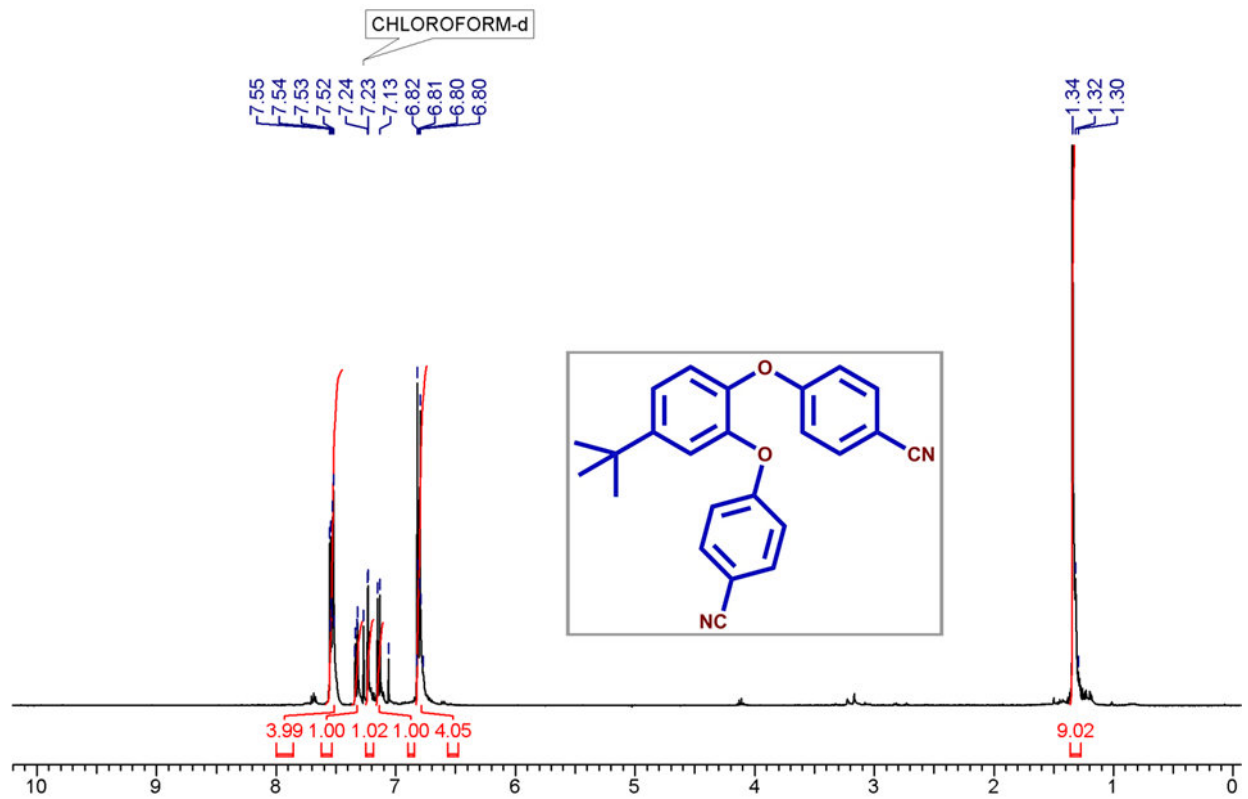

Figure S2:  $^1\text{H}$  NMR spectrum of Ligand L'.

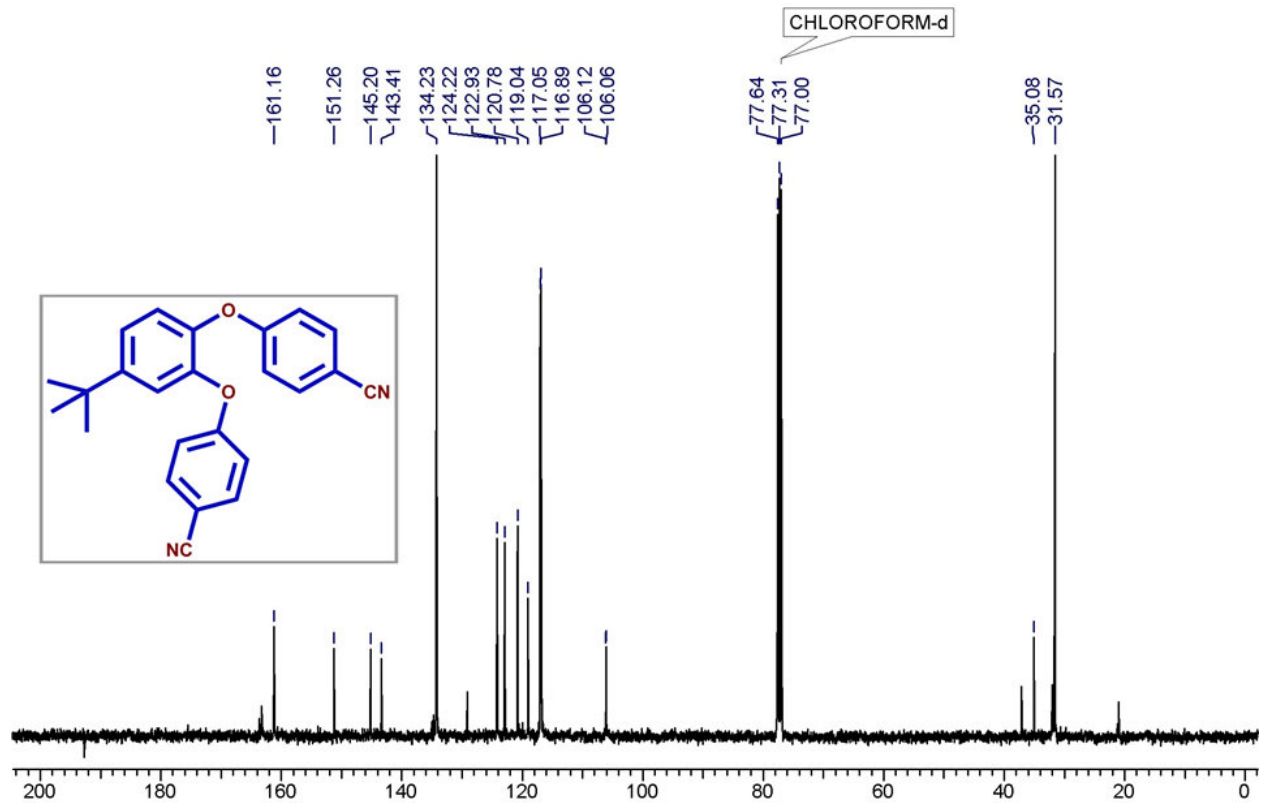

Figure S3:  $^{13}\text{C}$  NMR spectrum of Ligand L'.



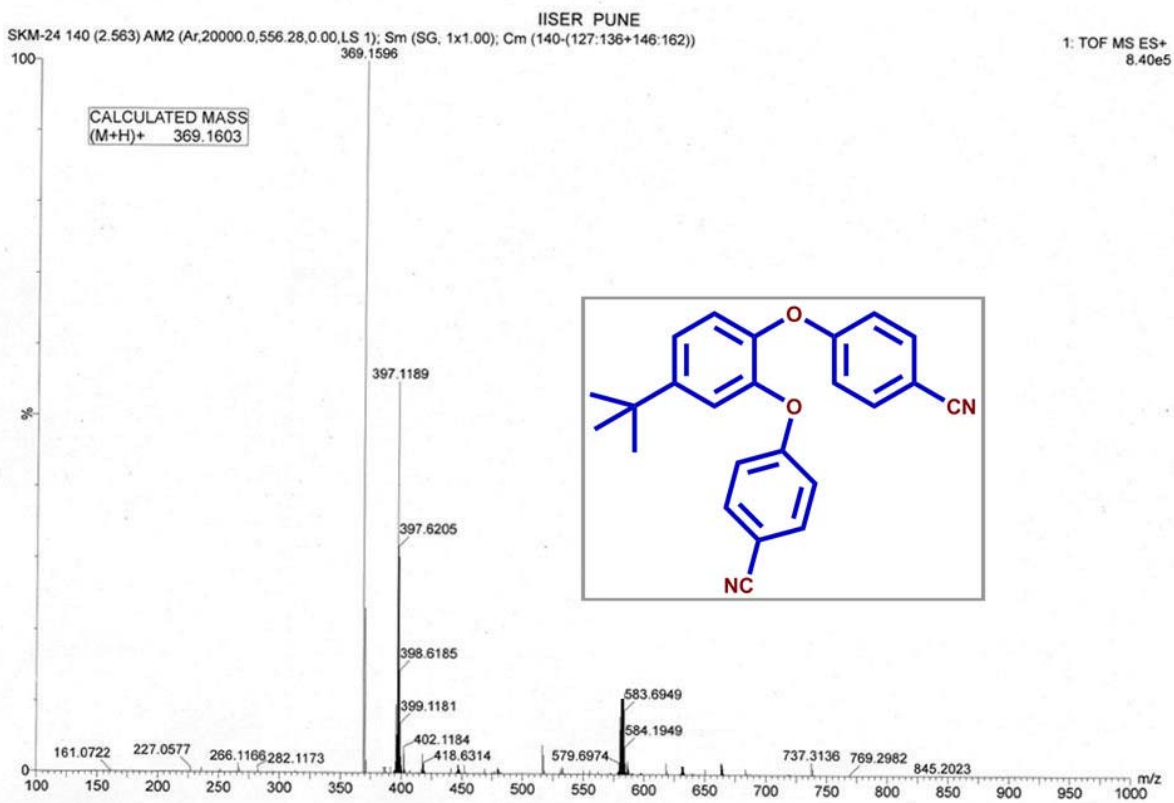

Figure S4: HRMS spectrum of Ligand L'.

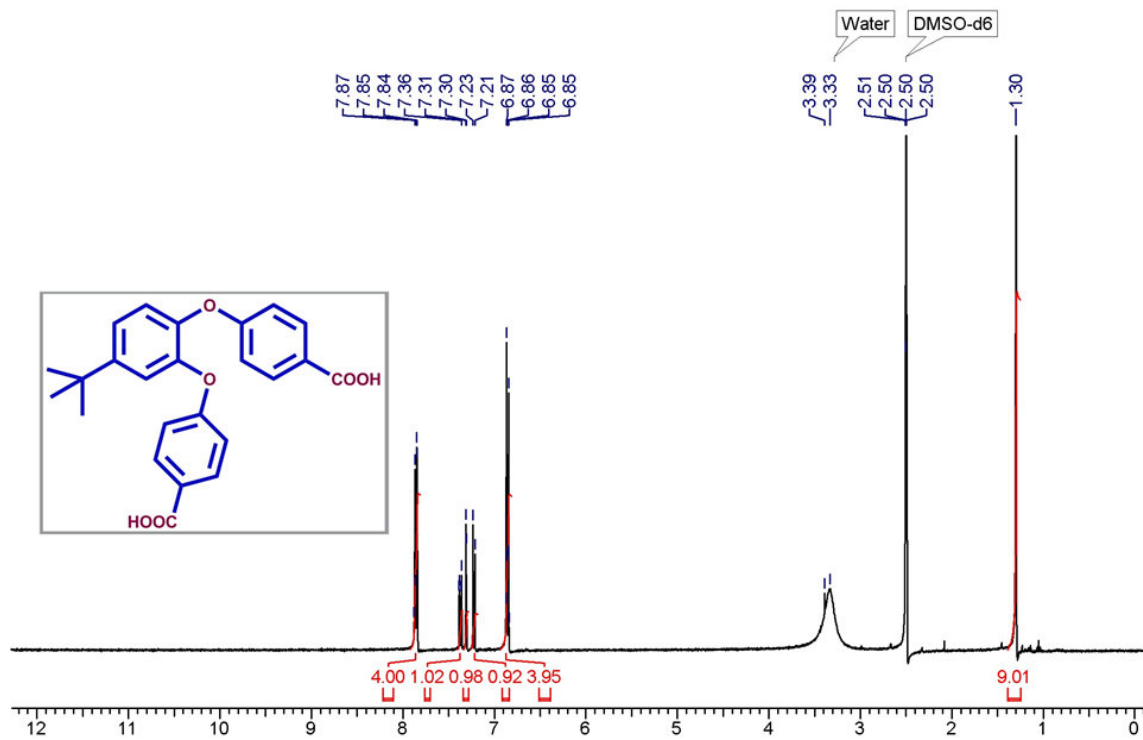

Figure S5: <sup>1</sup>H NMR spectrum of Ligand H<sub>2</sub>L.

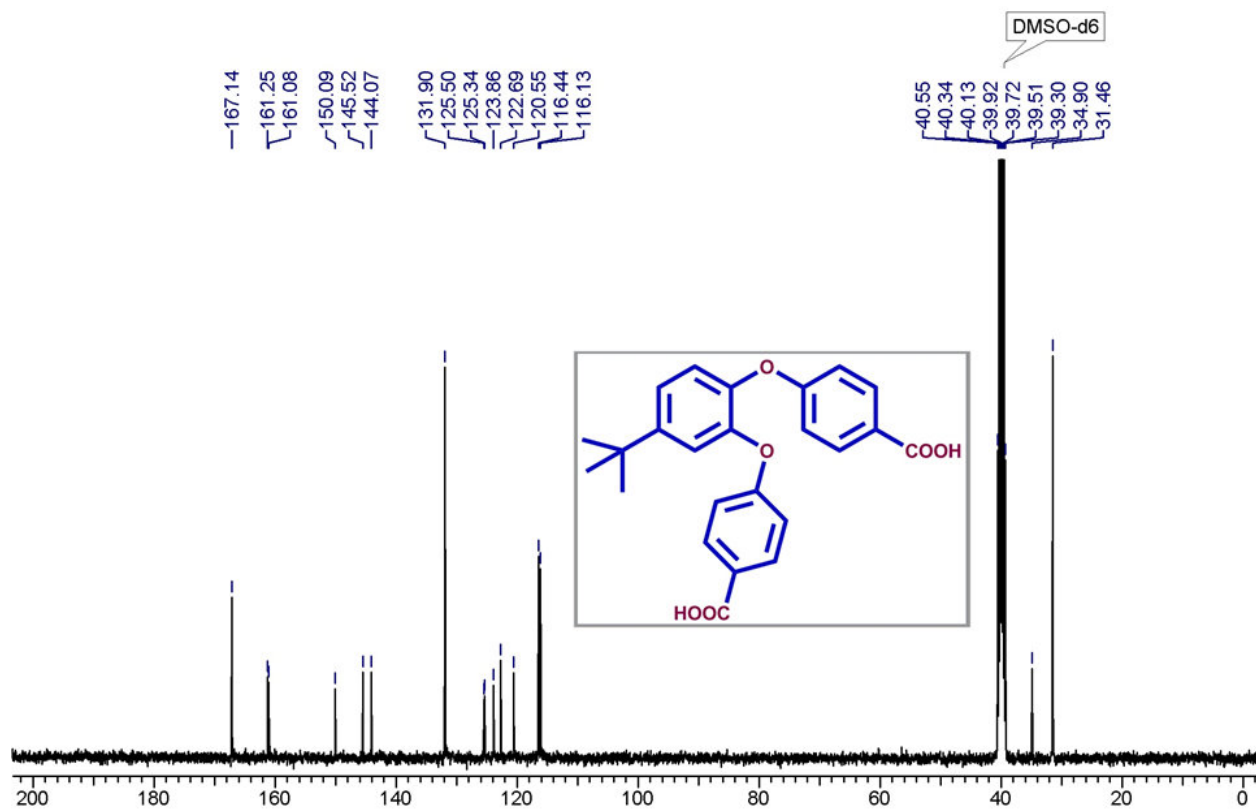

Figure S6: <sup>13</sup>C NMR spectrum of Ligand H<sub>2</sub>L.

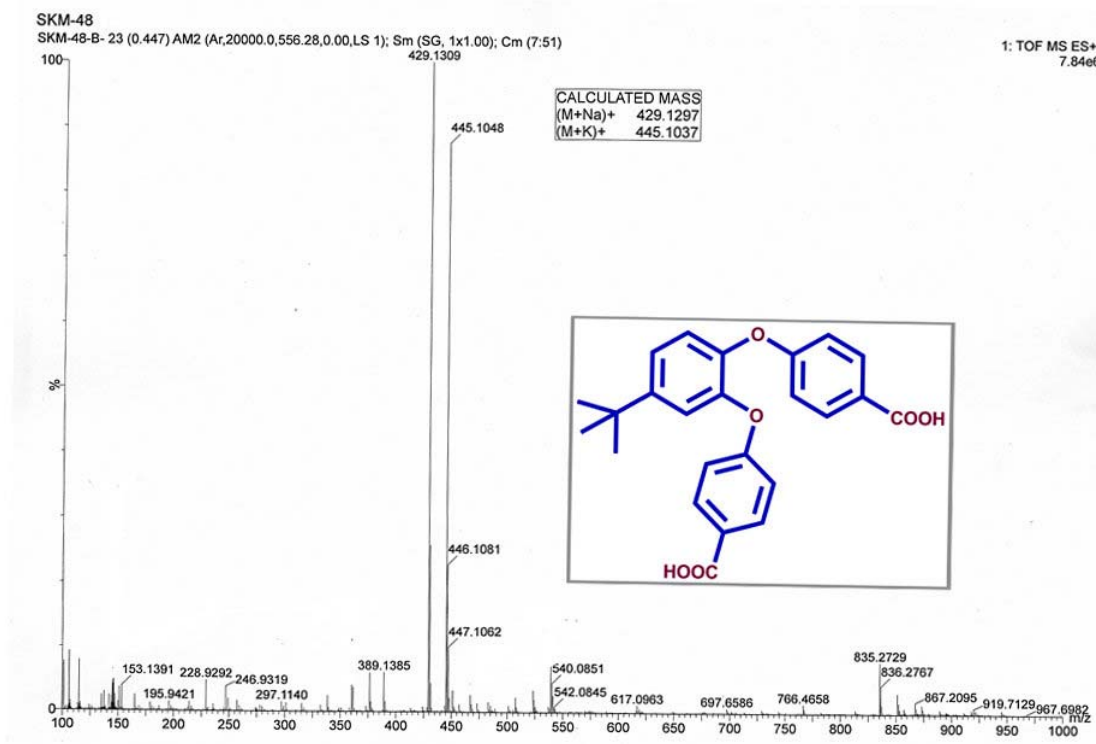

Figure S7: HRMS spectrum of Ligand H<sub>2</sub>L.

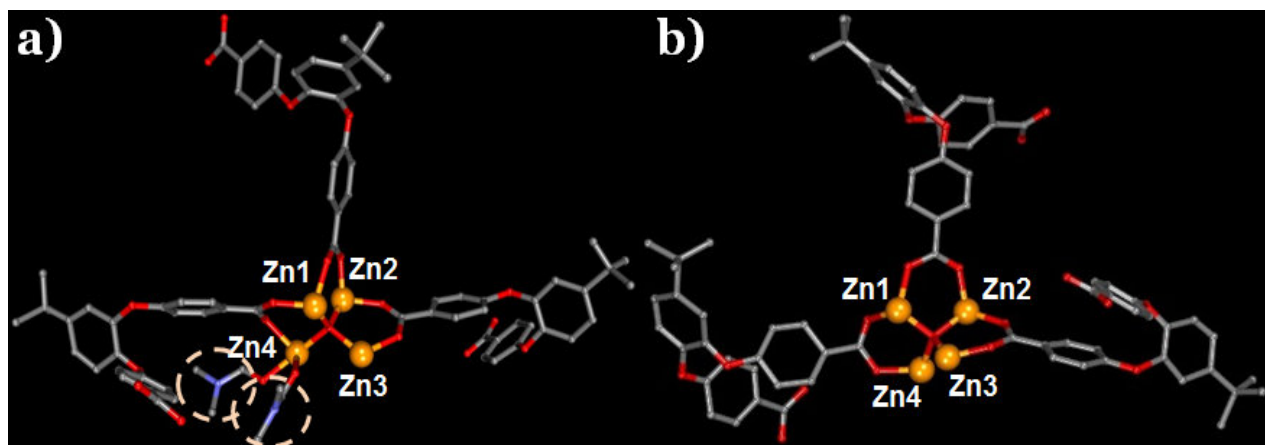

**Figure S8:** Asymmetric unit of the two phases: a) as-synthesized phase **1D-G**; b) desolvated phase **1**; DMF molecules coordinated to Zn4 to make its environment octahedral are shown by dashed circle (water molecules are omitted for clarity for a)).

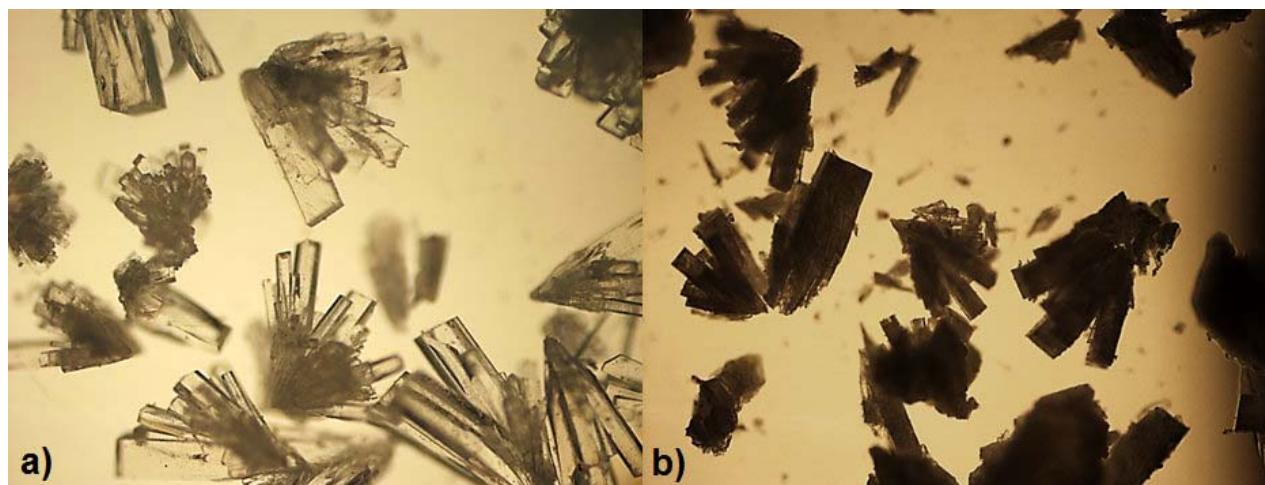

**Figure S9:** Microscopy images of the crystals for two different SCSC phases: a) compound **1D-G** (as synthesized), b) compound **1** (desolvated).

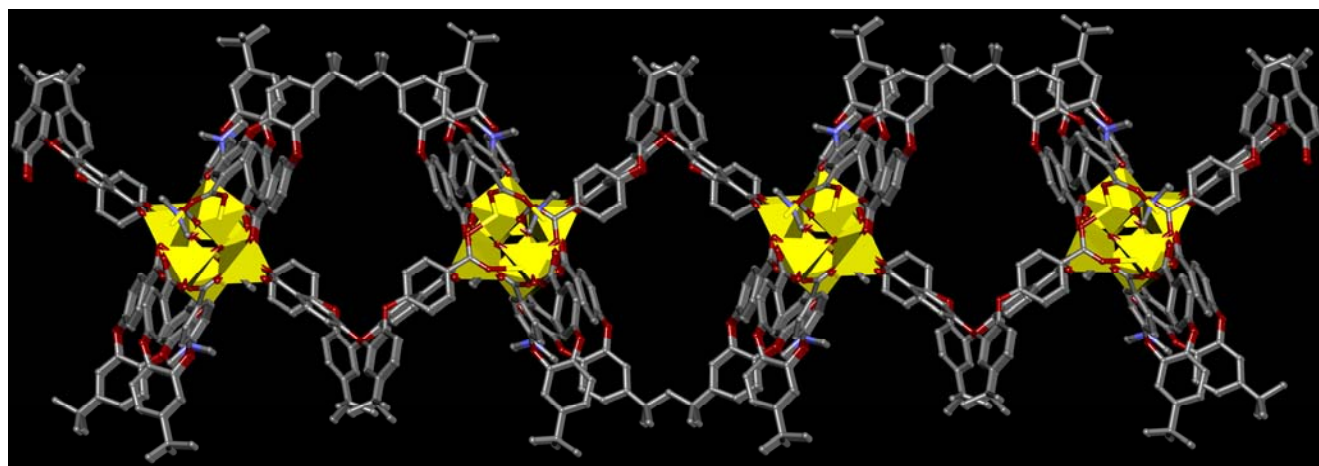

**Figure S10:** Progression of a single 2D-sheet (along  $c$ -axis) for the phase  $1D3G$ .

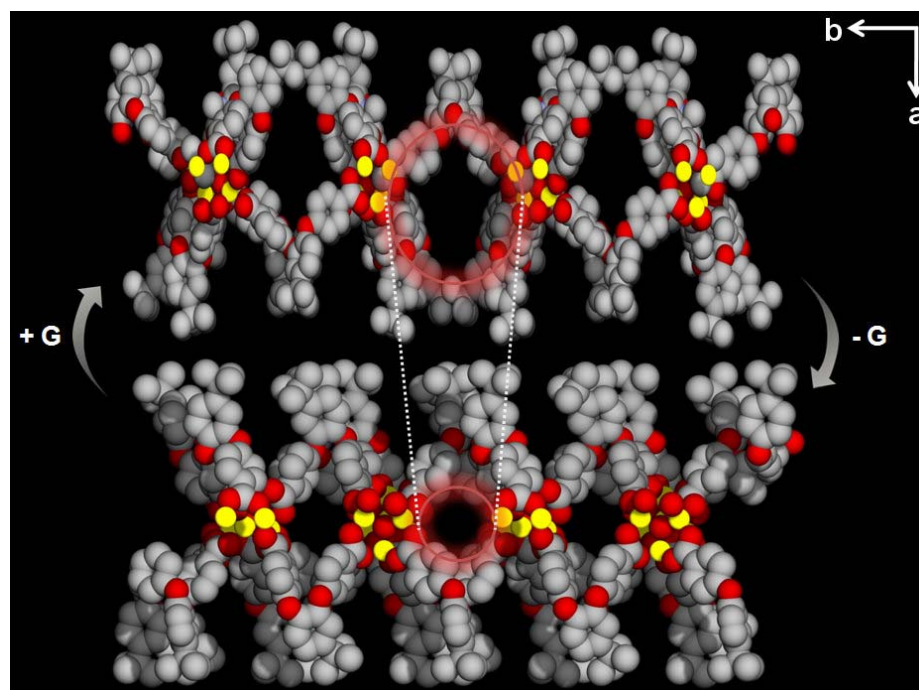

**Figure S11:** Squeezing of the channels of the single 2D-sheets (along  $c$ -axis) for the phases  $1D3G$  and  $1$ .



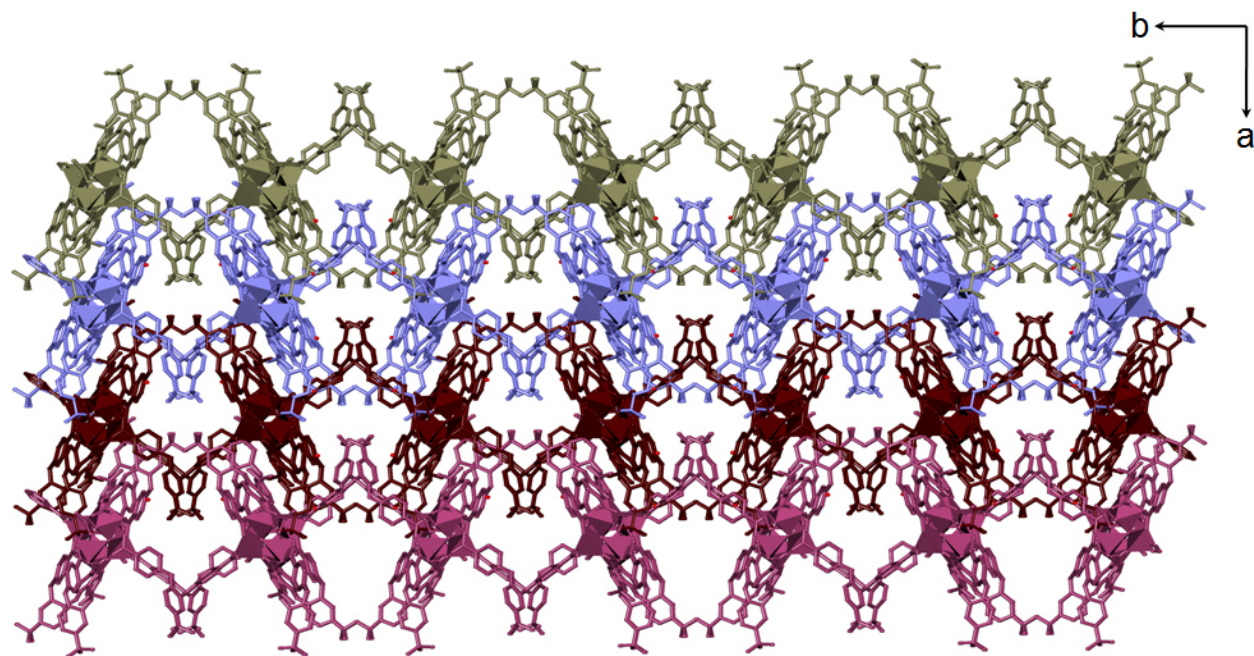

**Figure S12:** Perspective view along  $c$ -axis for the as-synthesized phase **1D-G** (each color representing a 2D-sheet).

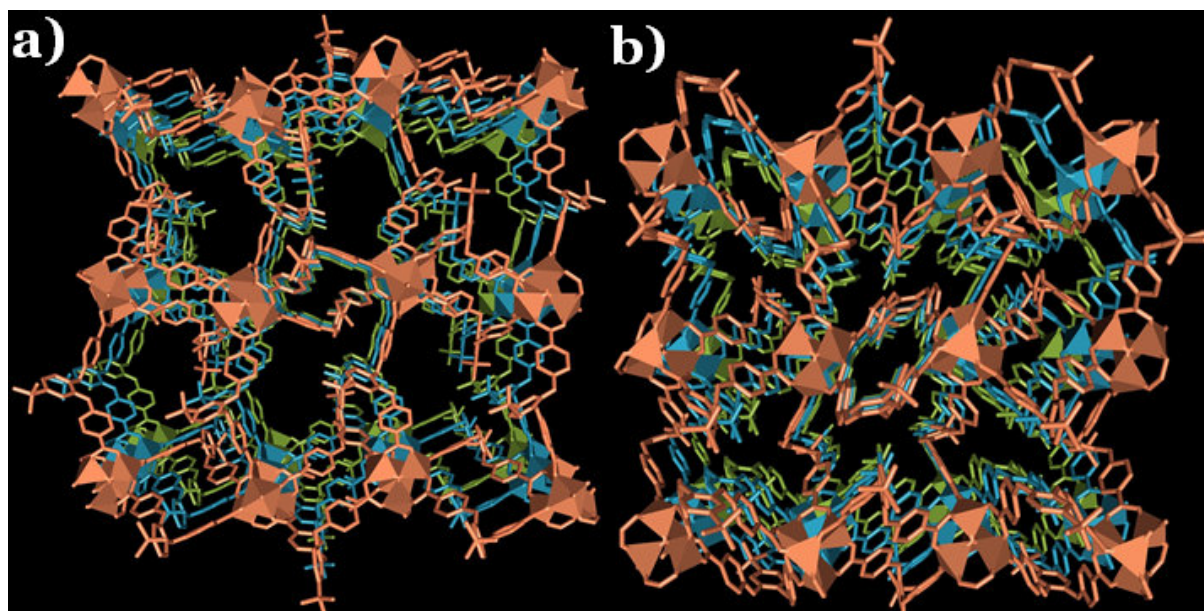

**Figure S13:** Perspective view along  $a$ -axis for the two phases: a) as-synthesized phase **1D-G**; b) desolvated phase **1** (three nets shown in different colors) (guest molecules omitted for clarity).

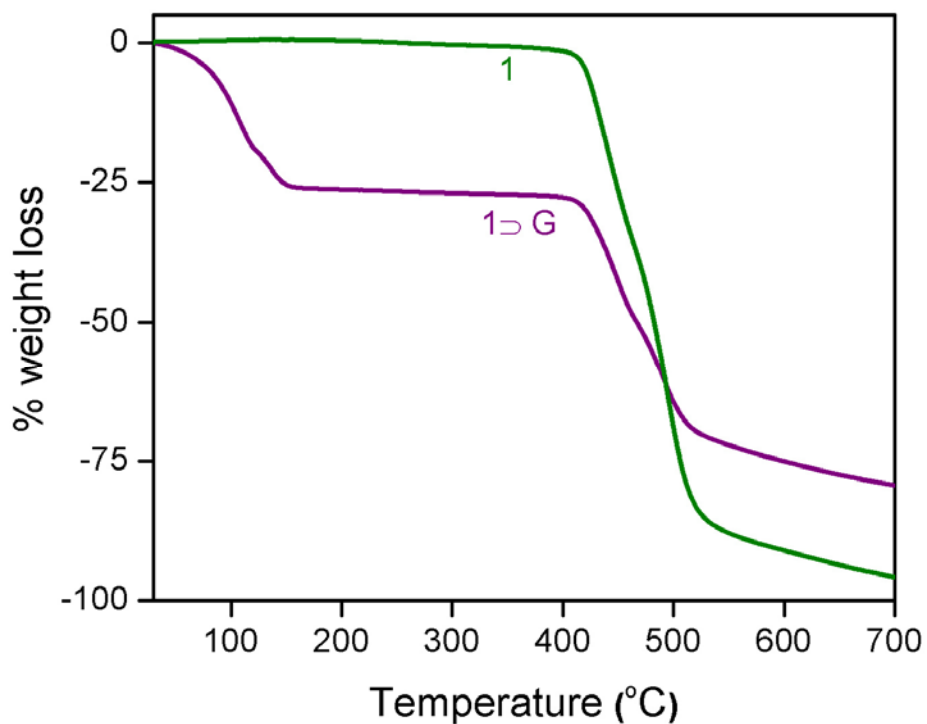

**Figure S14:** Thermogravimetric analysis (TGA) plots for the as-synthesized (**1**⊃**G**; purple color) and desolvated (**1**; olive color) compounds.

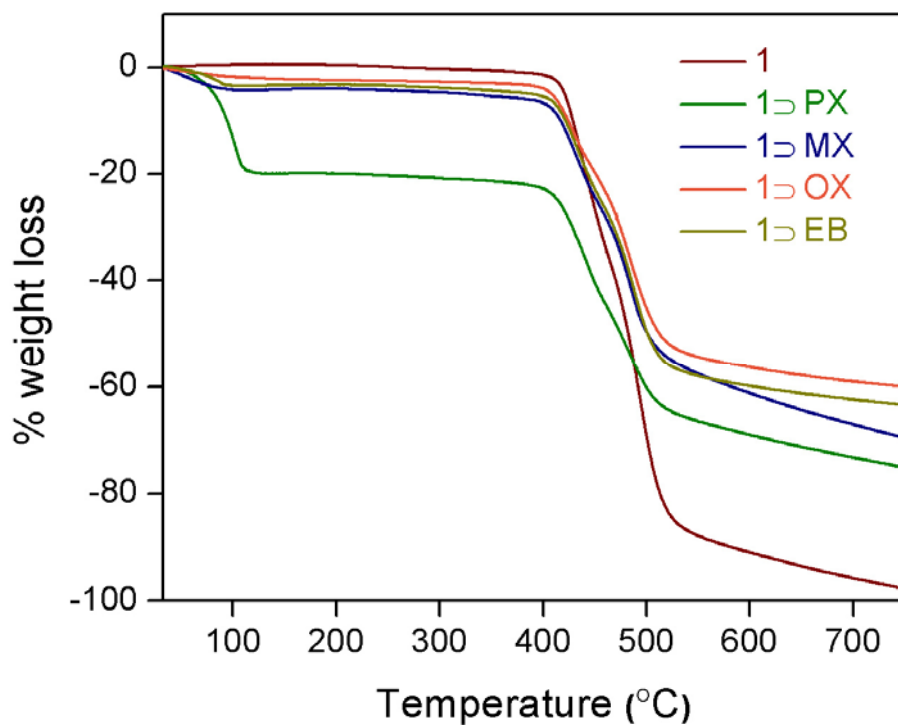

**Figure S15:** TGA plots for the guest-exposed phases of **1** (**1**⊃**solvent**), compared with that of **1** (wine). Vapour of solvents like *p*-xylene (olive), *m*-xylene (orange), *o*-xylene (navy) and ethyl benzene (dark yellow) were exposed.

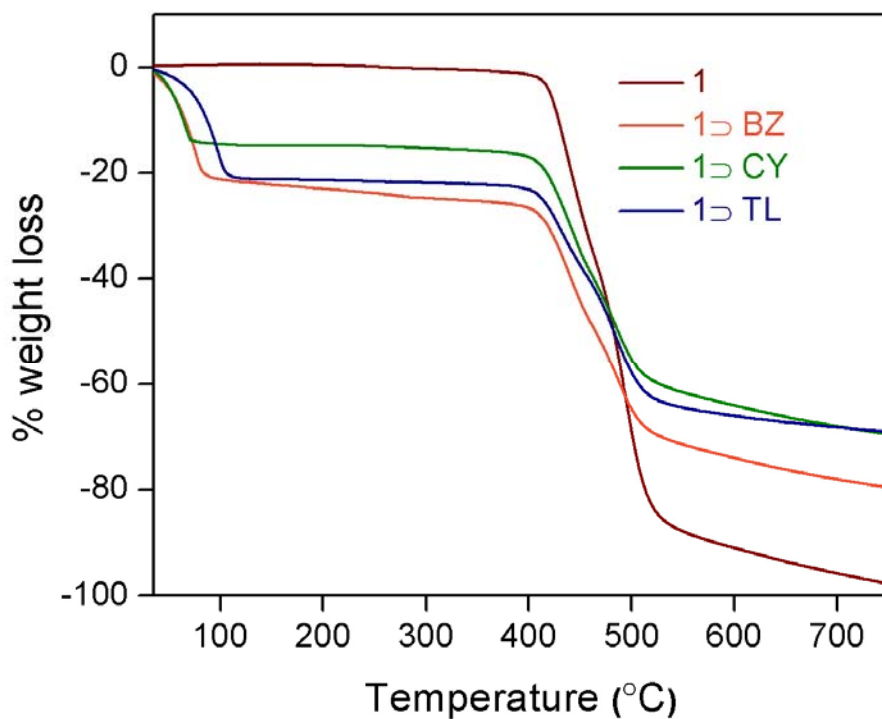

**Figure S16:** TGA plots for the guest-exposed phases of **1** (**1**⊃ solvent), compared with that of **1** (wine). Vapour of solvents like **Benzene** (orange), **Toluene** (olive), and **cyclohexane** (royal blue) were exposed.

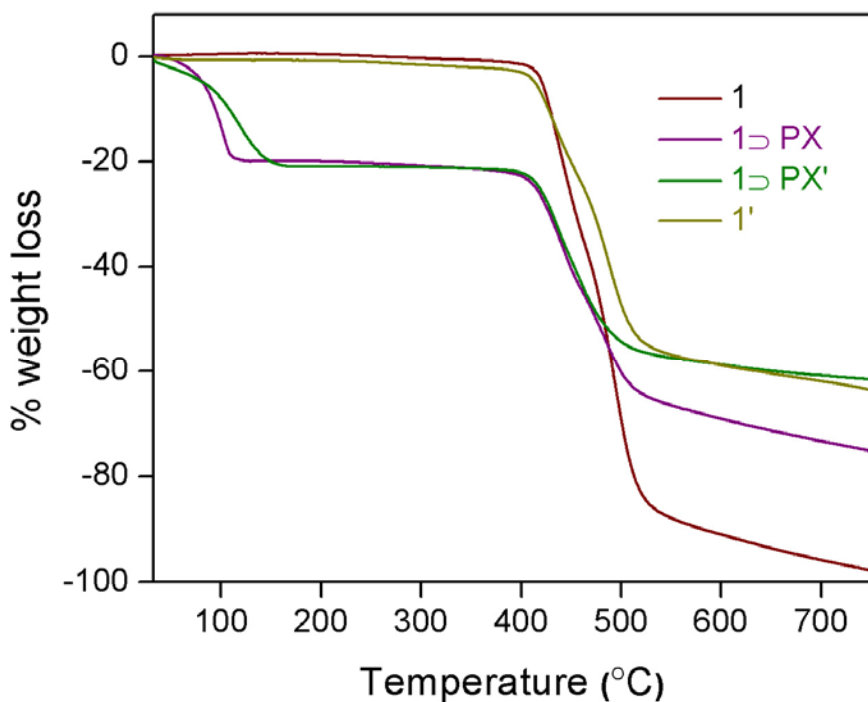

**Figure S17:** TGA plots for desolvated phase **1** (wine), compared with that of PX-exposed sample **1**⊃PX (purple), crystals **1**⊃PX', along with the heated (redesolvated) phase **1**'.

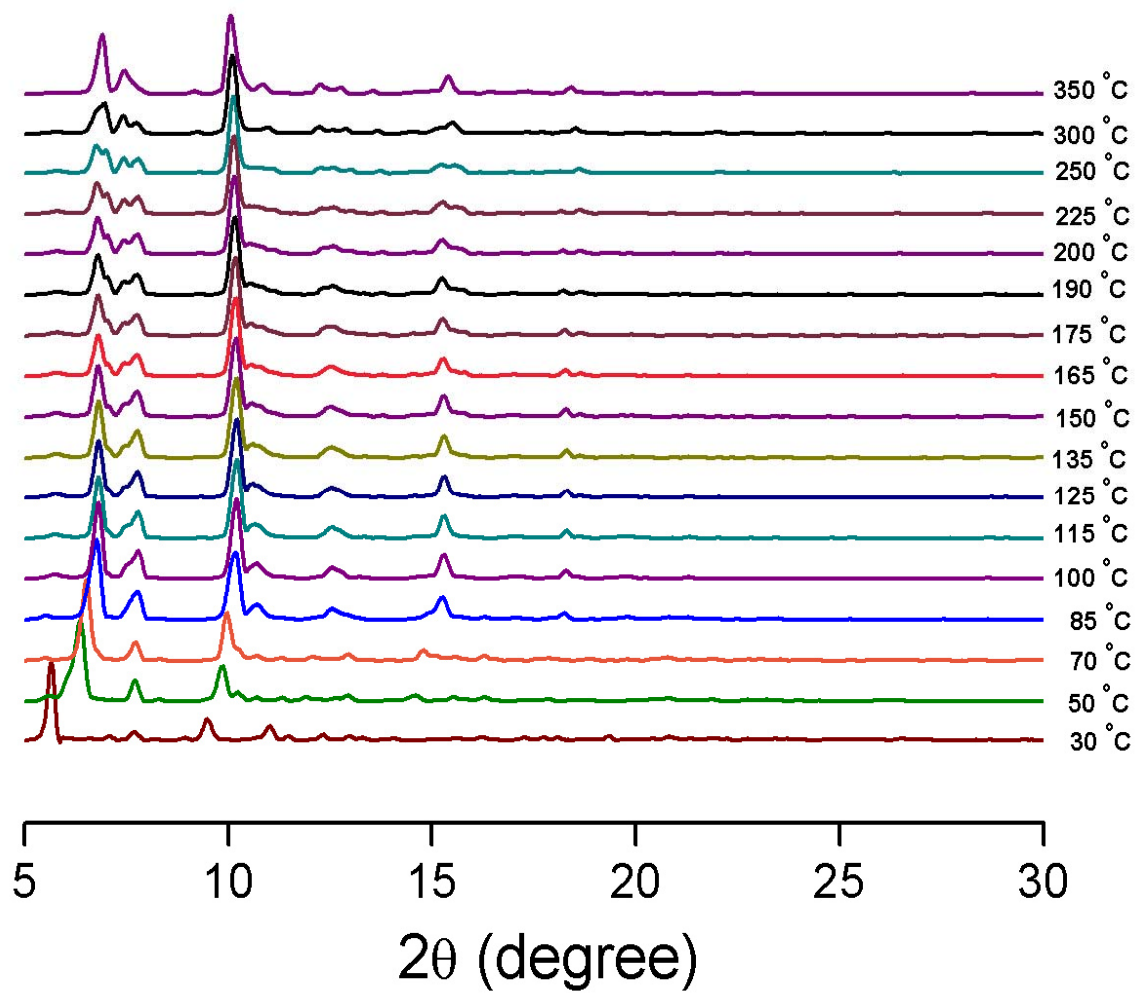

**Figure S18:** Variable temperature powder X-ray diffraction (PXRD) patterns of compound 1D6.



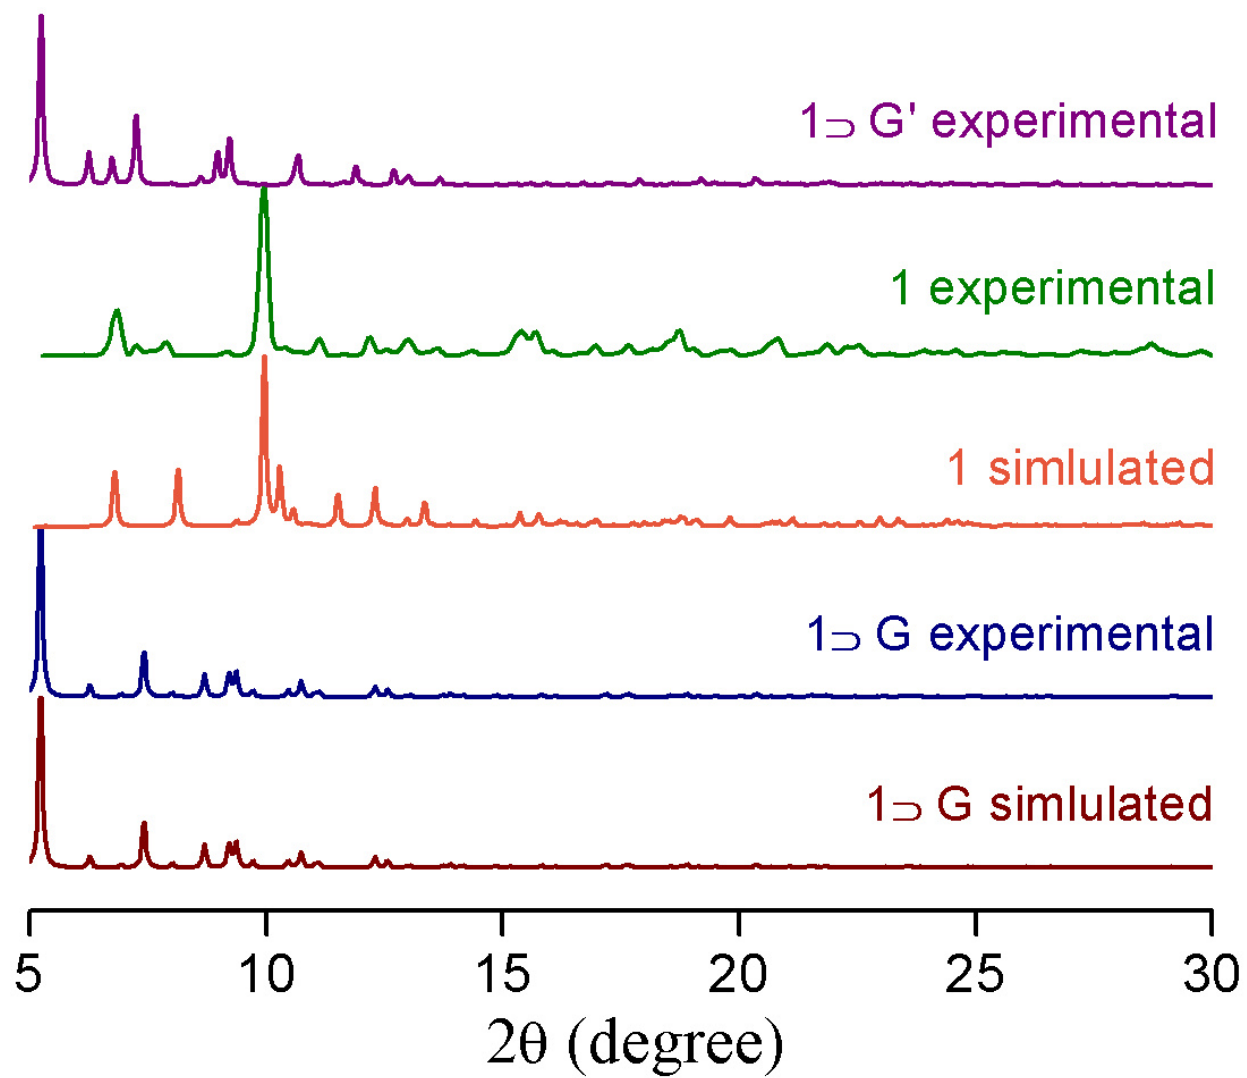

**Figure S19:** Powder X-ray diffraction (PXRD) patterns of compounds 1D G, 1 and 1D G'.

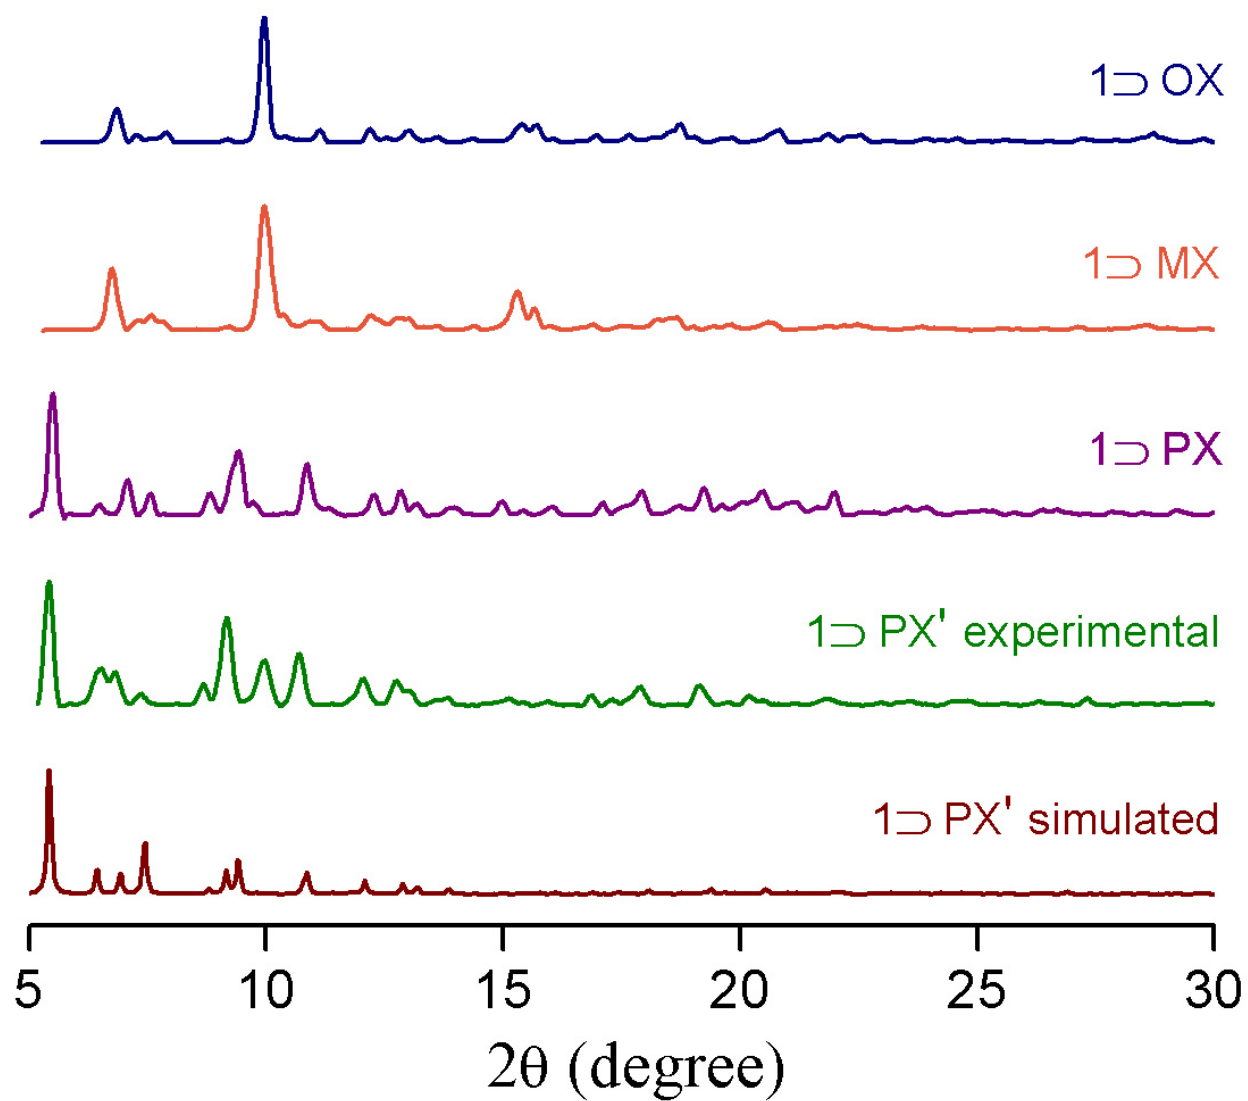

**Figure S20:** Simulated and experimental PXRD patterns of **1D PX'**, and experimental PXRD patterns for three different solvent exposed samples (**1D solvent**): **PX** (*p*-xylene), **MX** (*m*-xylene), **OX** (*o*-xylene).

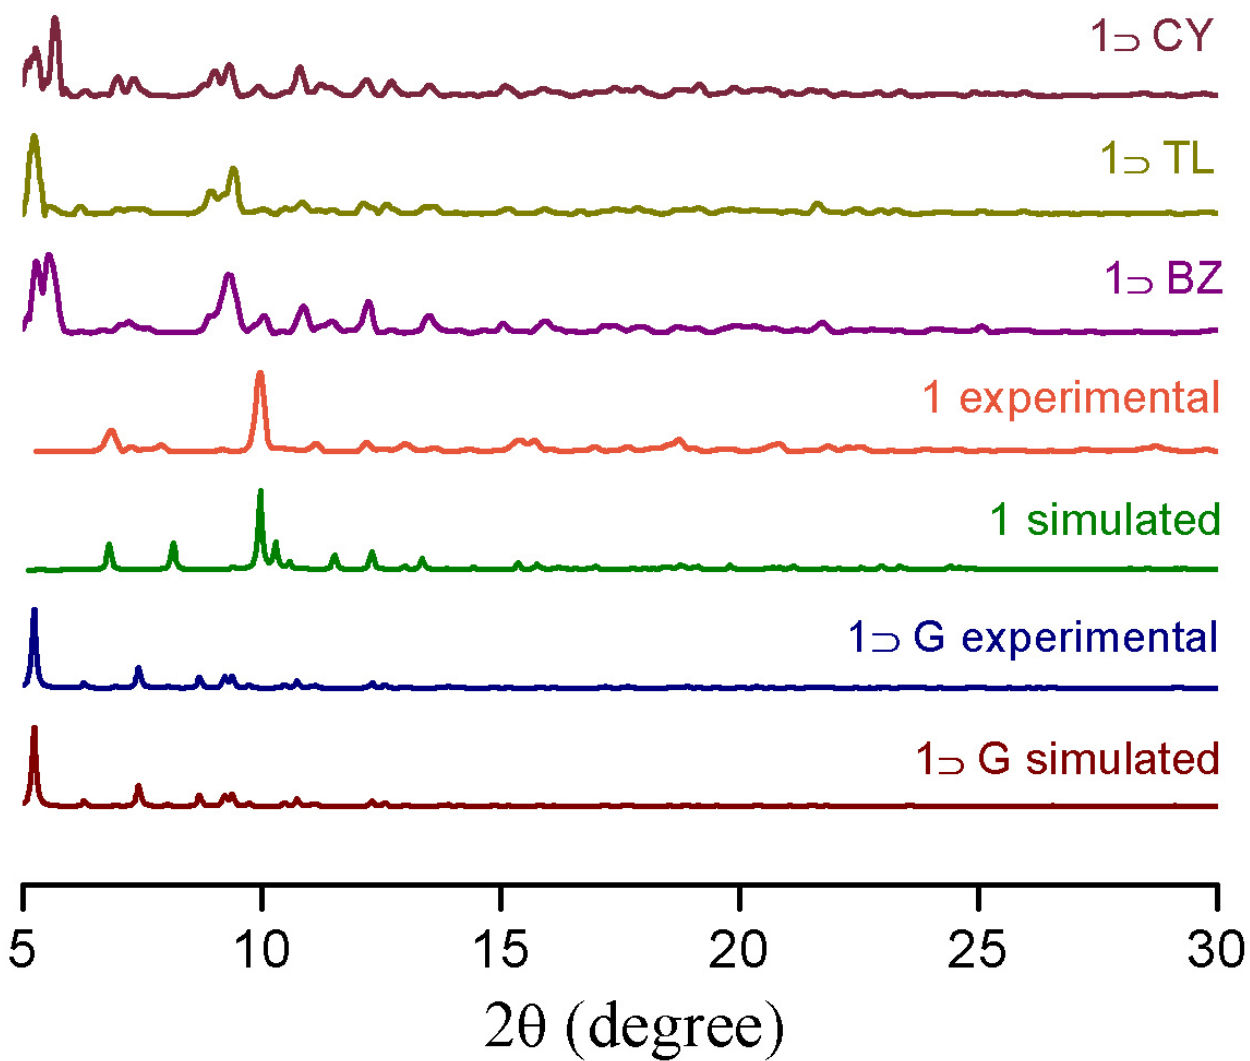

**Figure S21:** Simulated and experimental PXRD patterns of **1** $\supset$ G and **1**, and experimental PXRD patterns for different solvent exposed samples (**1** $\supset$ solvent); **BZ** (benzene), **TL** (toluene), and **CY** (cyclohexane).

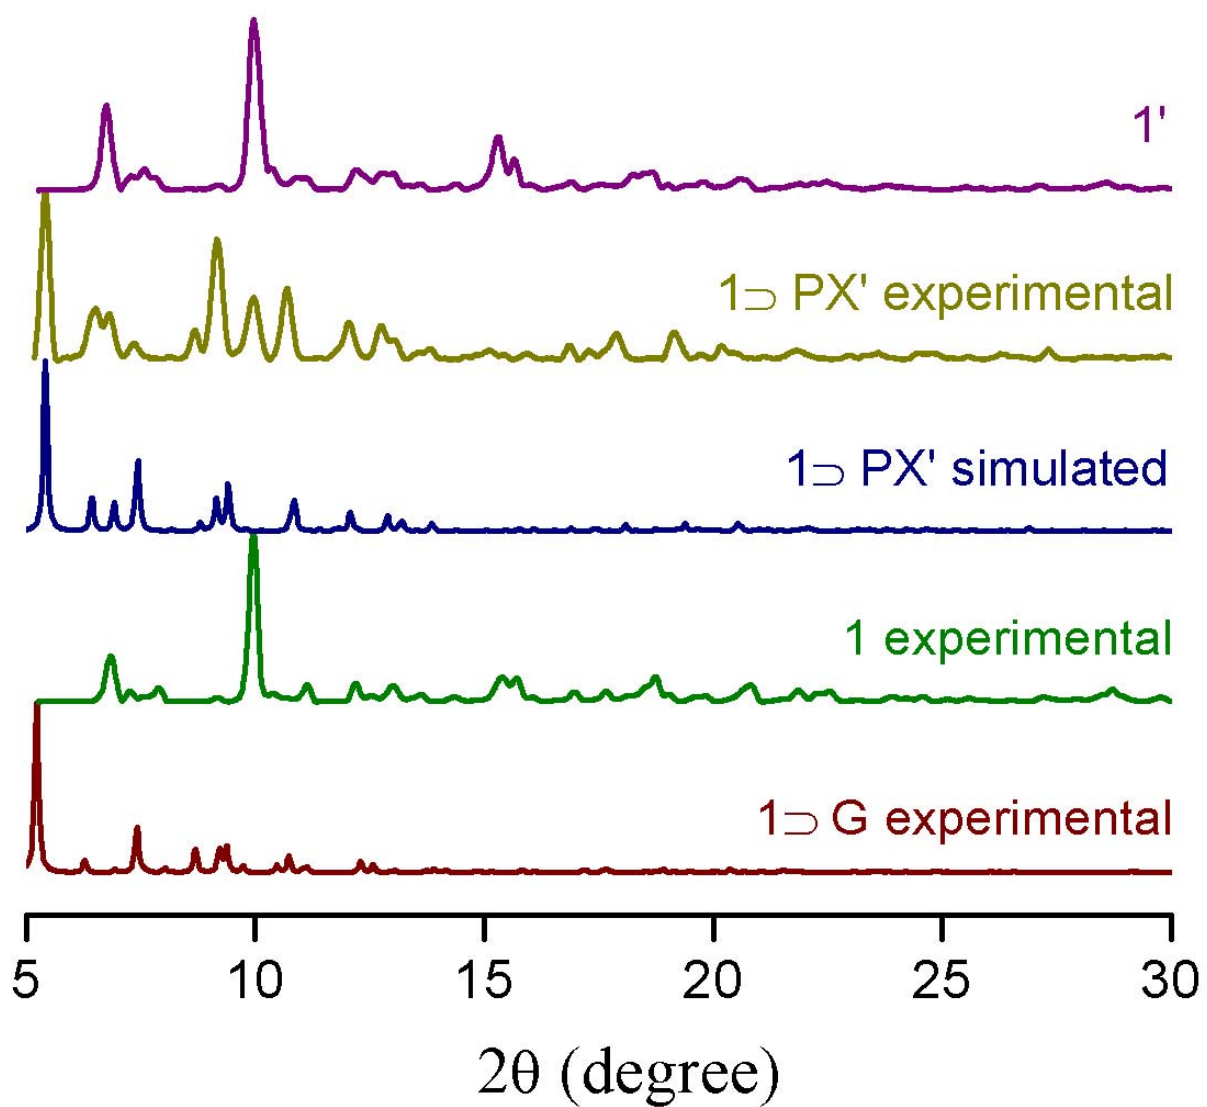

**Figure S22:** Powder X-ray diffraction (PXRD) patterns of compounds **1⊃G** (experimental), **1** (experimental), **1⊃PX'** (simulated), **1⊃PX'** (experimental) and **1'**(phase after heating phase **1⊃PX'**).

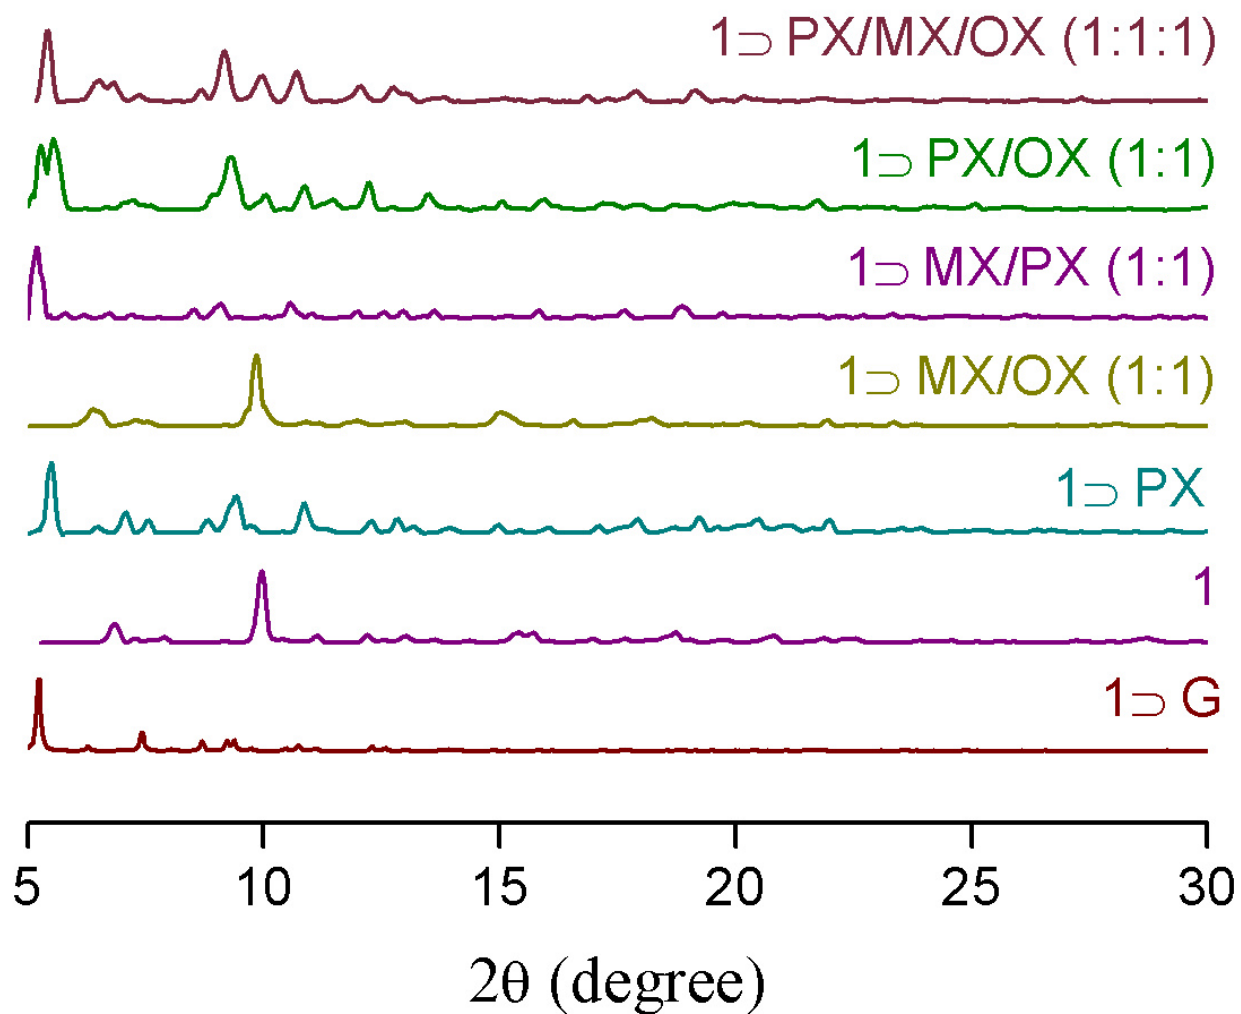

**Figure S23:** Experimental Powder X-ray diffraction (PXRD) patterns for compounds **1⊃G**, **1**, and the vapor-exposed phases: **1⊃PX** (only PX), **1⊃MX/OX** (binary mixture of 1:1 v/v MX and OX), **1⊃MX/PX** (binary mixture of 1:1 v/v MX and PX), **1⊃PX/OX** (binary mixture of 1:1 v/v PX and OX), **1⊃PX/MX/OX** (ternary mixture of 1:1:1 v/v PX, MX and OX).

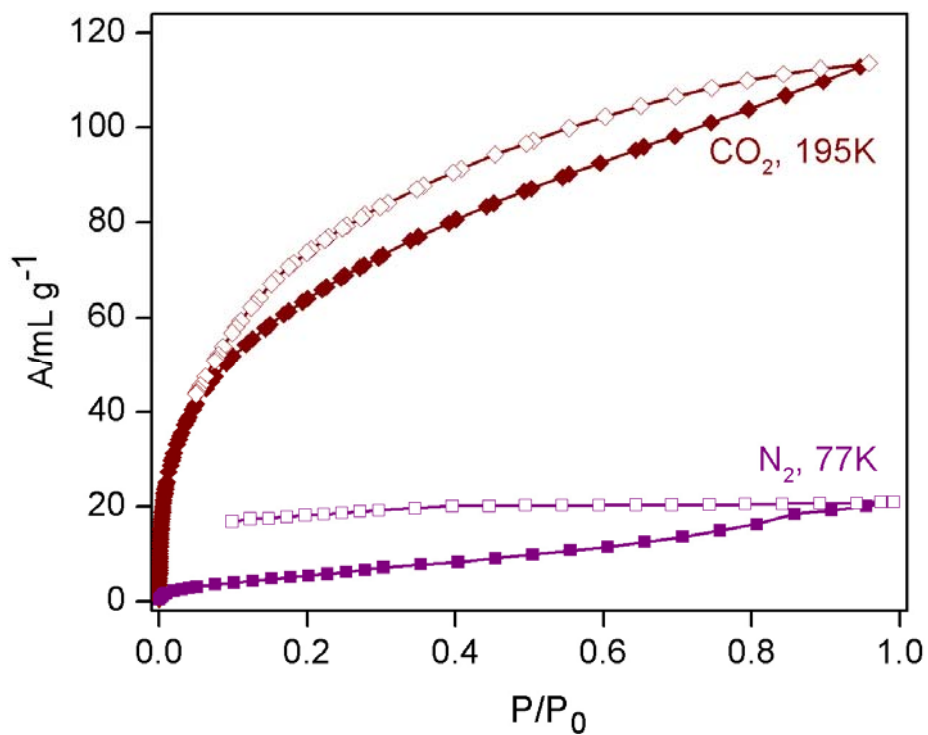

**Figure S24:** CO<sub>2</sub> and N<sub>2</sub> sorption isotherms of compound **1** at 195K and 77K respectively. Filled shapes = adsorption, hollow shapes = desorption.

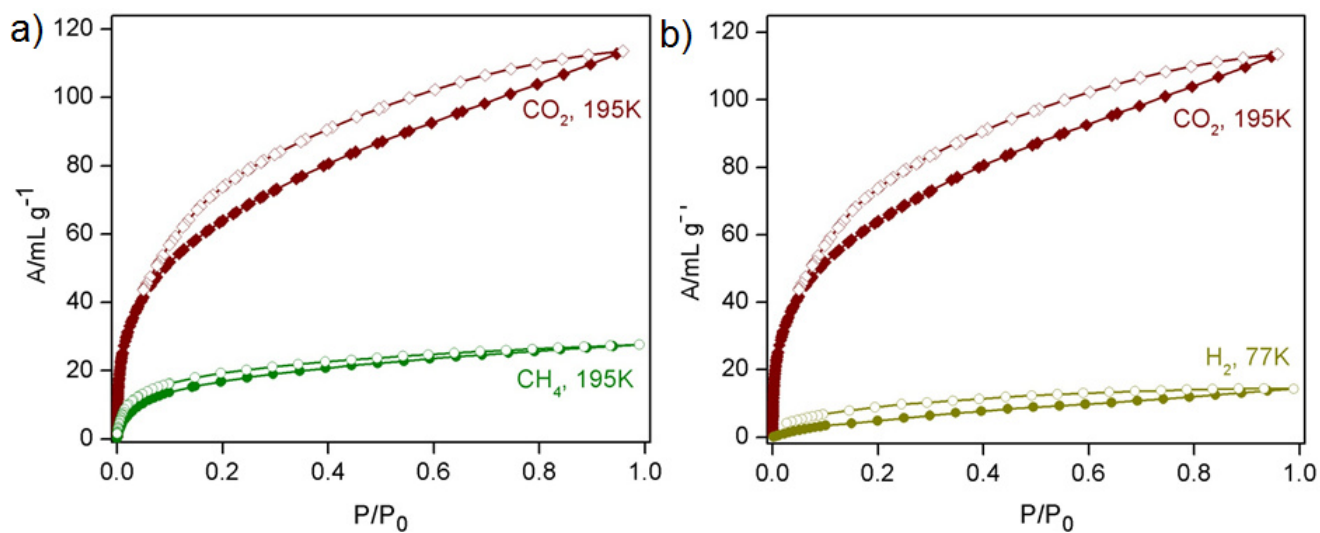

**Figure S25:** a) CO<sub>2</sub> and CH<sub>4</sub> sorption isotherms of compound **1** at 195K; b) CO<sub>2</sub> and H<sub>2</sub> sorption isotherms of compound **1** at 195K and 77K respectively. (Filled shapes = adsorption, hollow shapes = desorption).

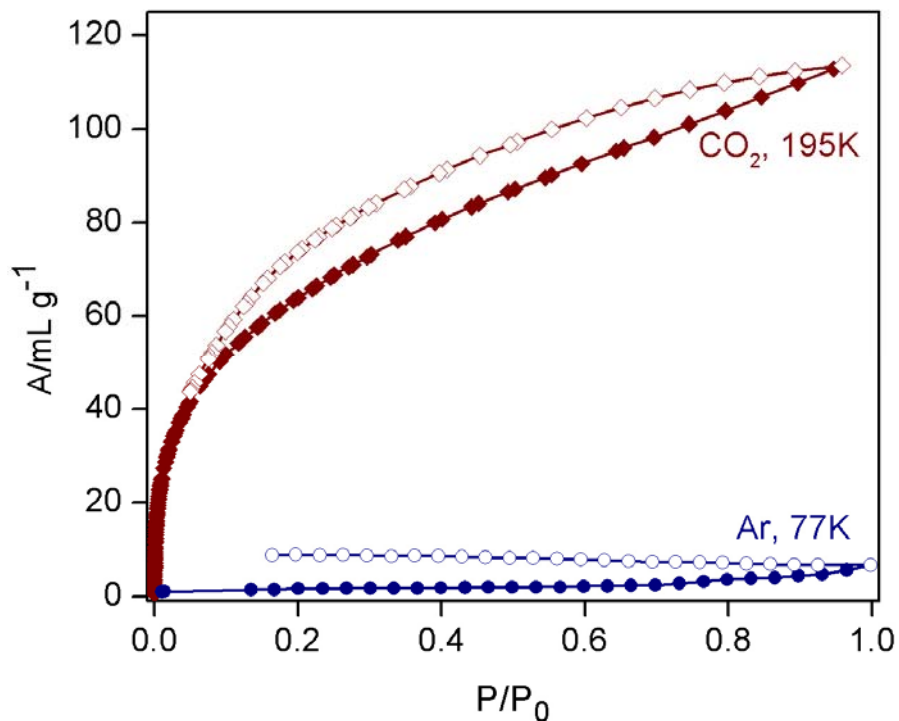

**Figure S26:**  $\text{CO}_2$  and Ar sorption isotherms of compound 1 at 195K and 77K respectively. Filled shapes = adsorption, hollow shapes = desorption.

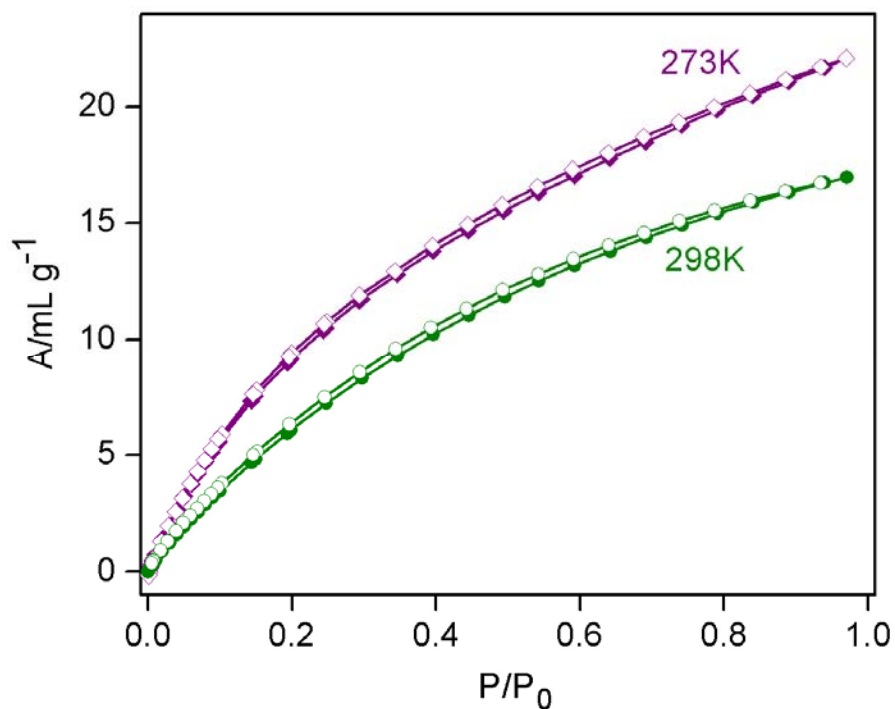

**Figure S27:**  $\text{CO}_2$  sorption isotherms of compound 1 at 273K and 298K; filled shapes = adsorption, hollow shapes = desorption.

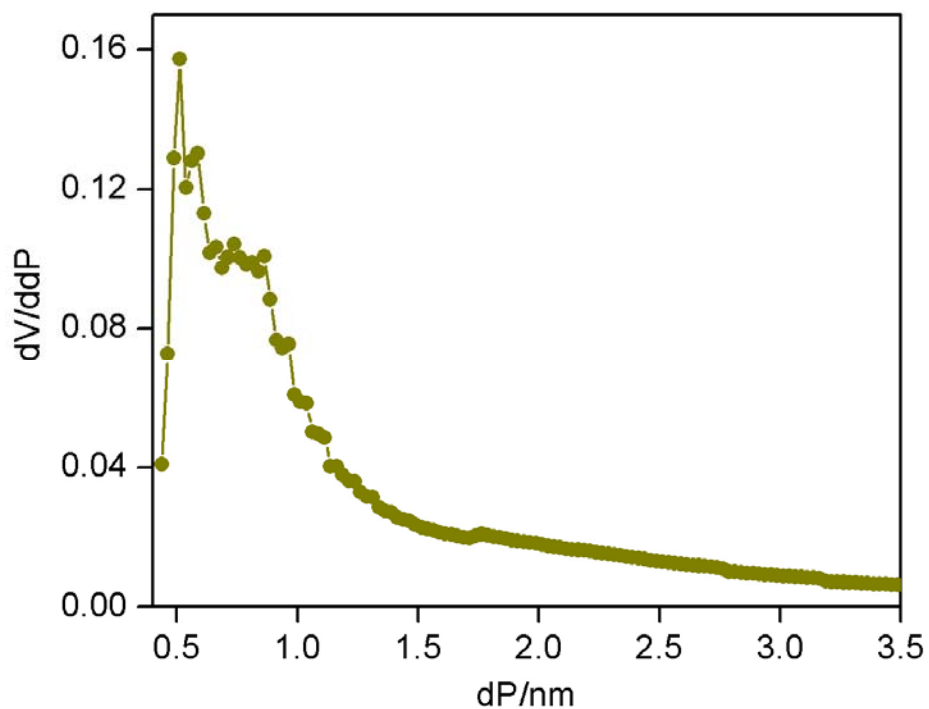

**Figure S28:** H-K (Horvath-Kawazoe) plot showing pore size distribution from CO<sub>2</sub> adsorption at 195K.

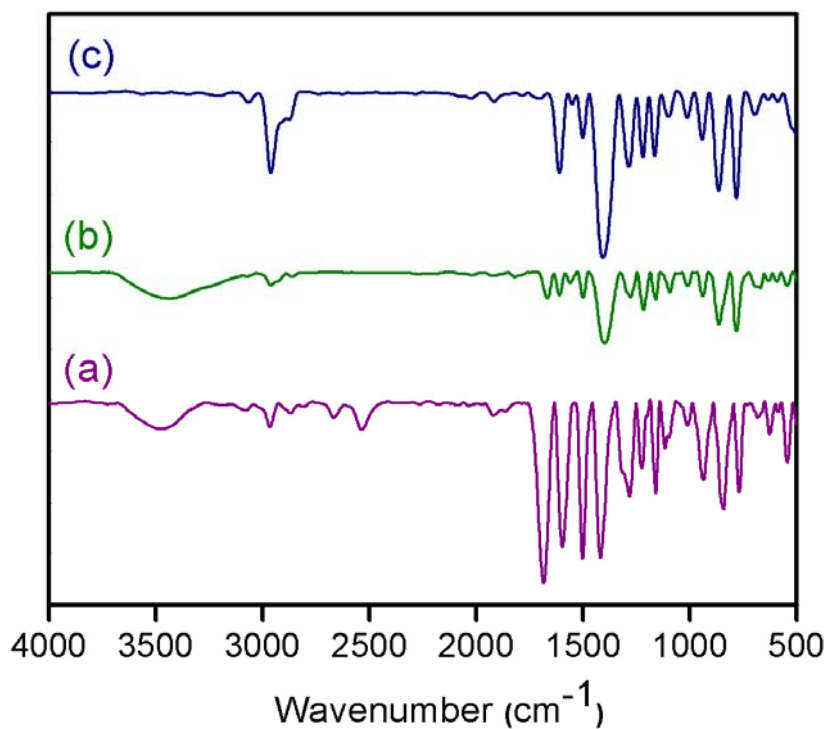

**Figure S29:** FTIR Spectra of (a) H<sub>2</sub>L, (b) compound 1D6, and (c) compound 1.



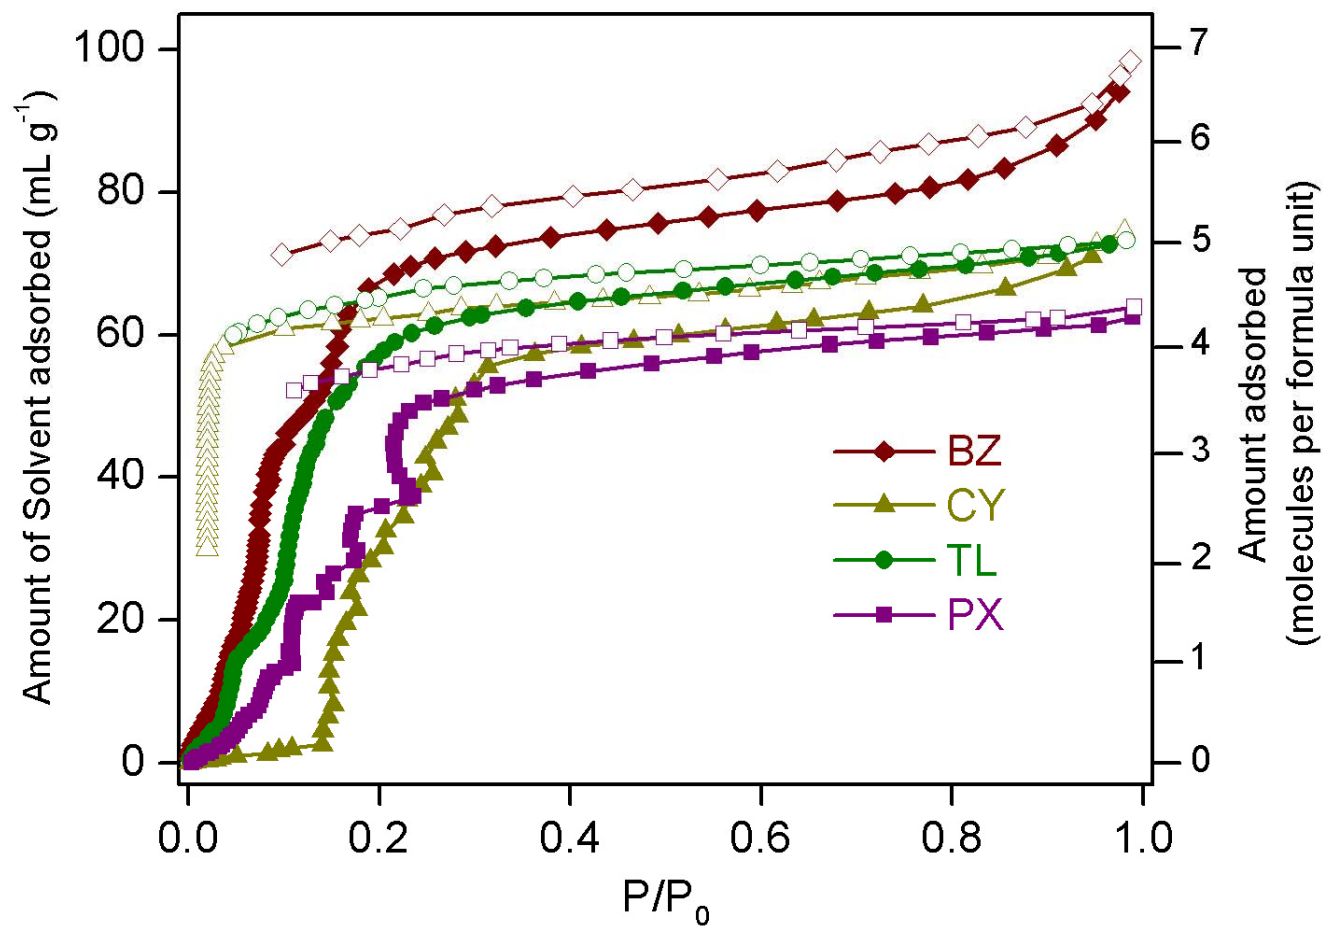

**Figure S30:** Solvent sorption isotherms for compound **1** recorded at 298K; color code: Benzene (wine red), toluene (olive), p-xylene (purple) and cyclohexane (dark yellow). Filled shapes: adsorption, hollow shapes: desorption.

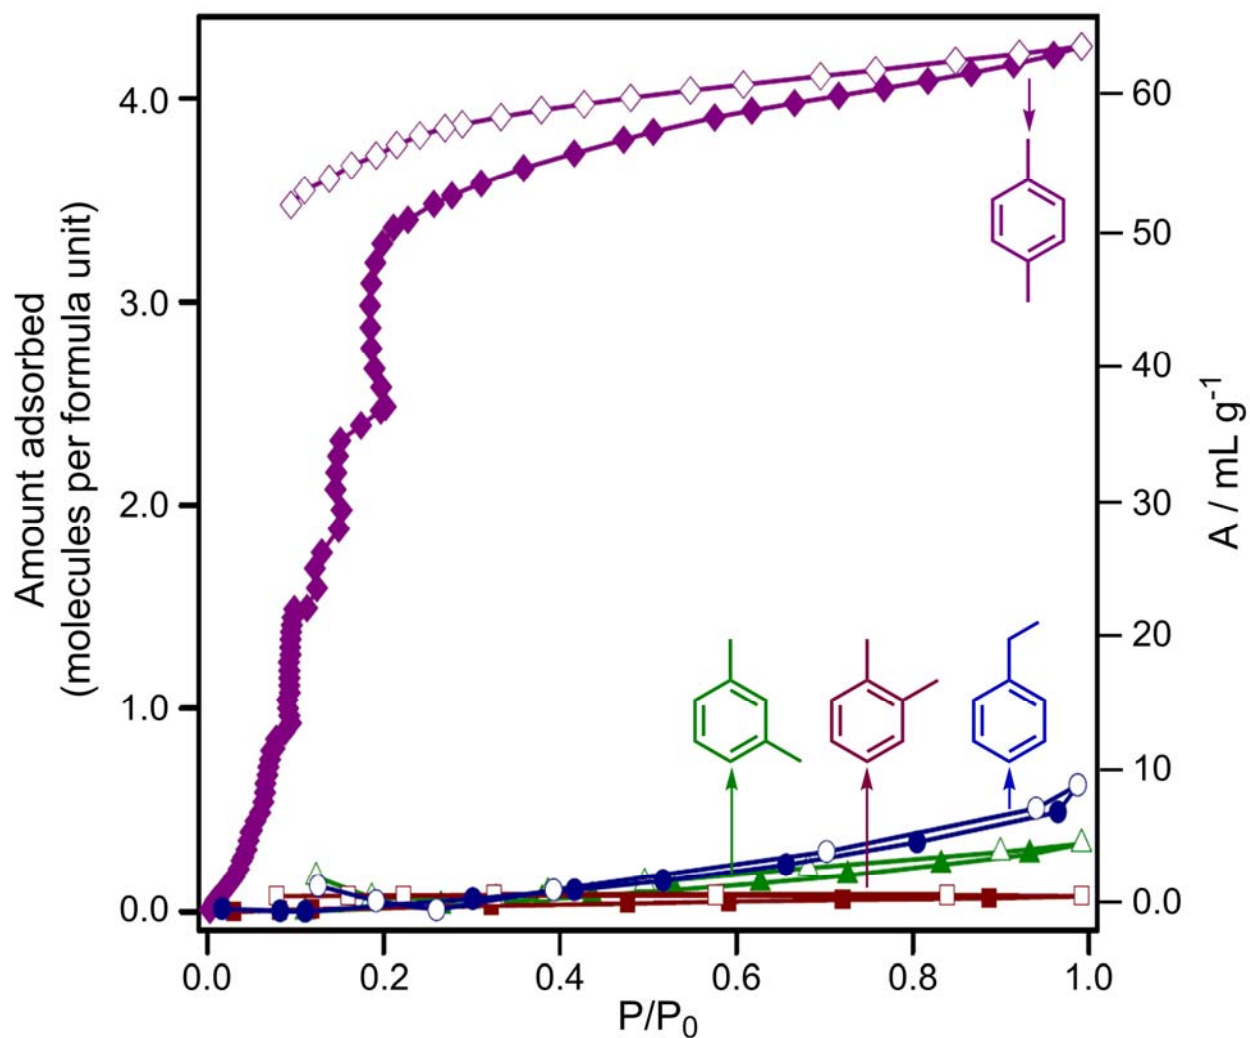

**Figure S31.** Solvent sorption isotherms for compound 1 at 298K for three xylene isomers along with isomeric ethyl benzene. Filled shapes: adsorption, hollow shapes: desorption.

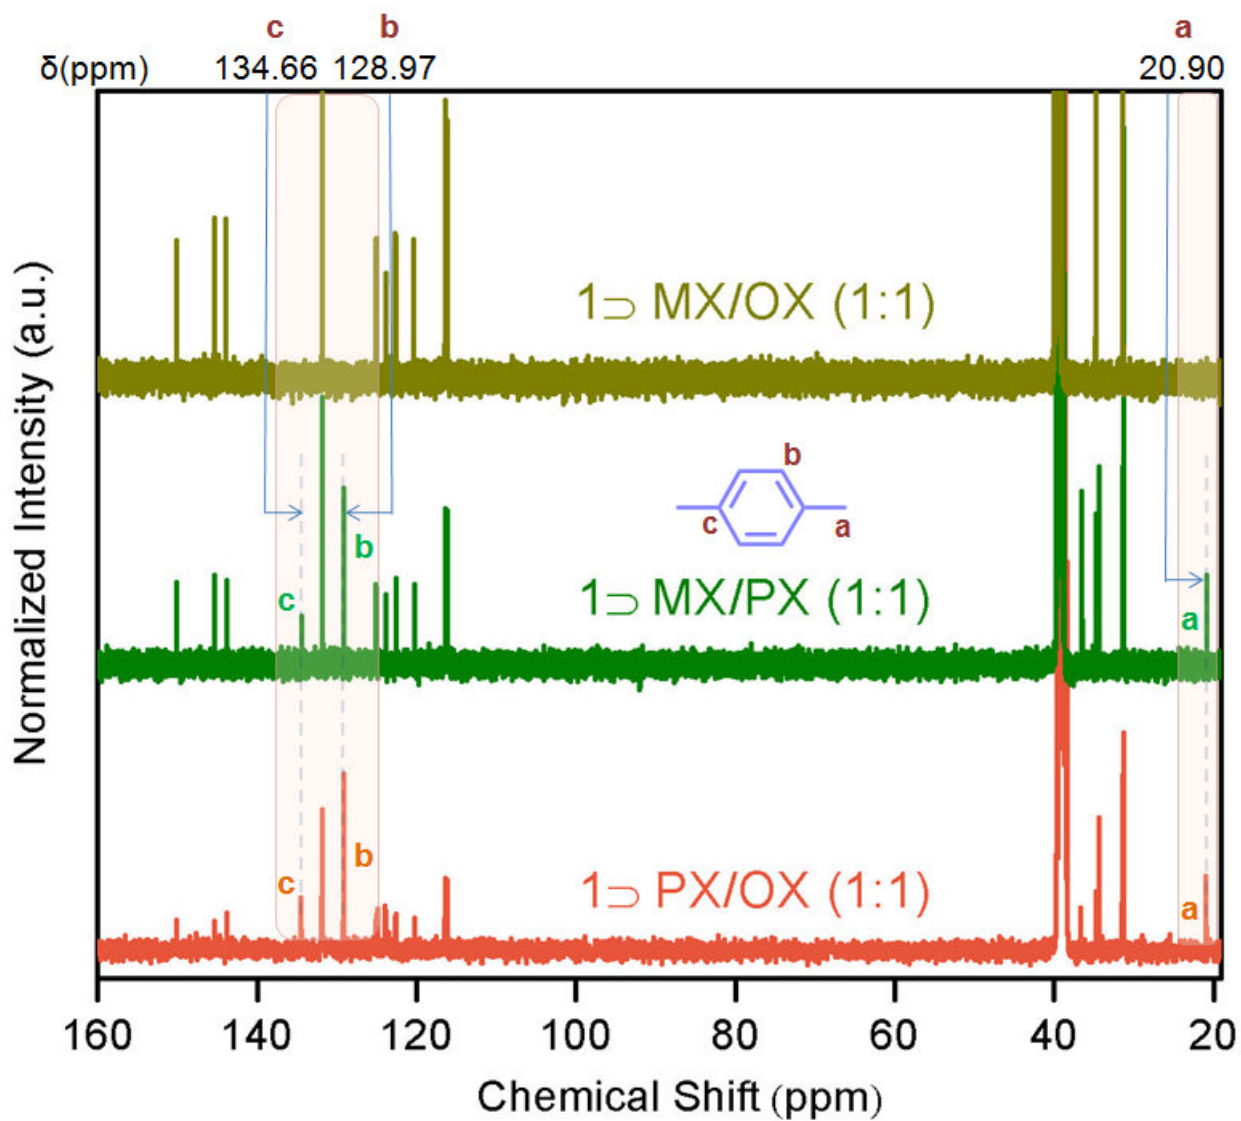

**Figure S32.**  $^{13}\text{C}$  NMR spectra for different binary-xylene (1:1) mixture vapor-exposed phases of compound **1**. Vapor of each of the binary mixtures (1:1) exposed for 72h to the phase **1** before digesting in  $\text{DCI/DMSO-}d_6$ .

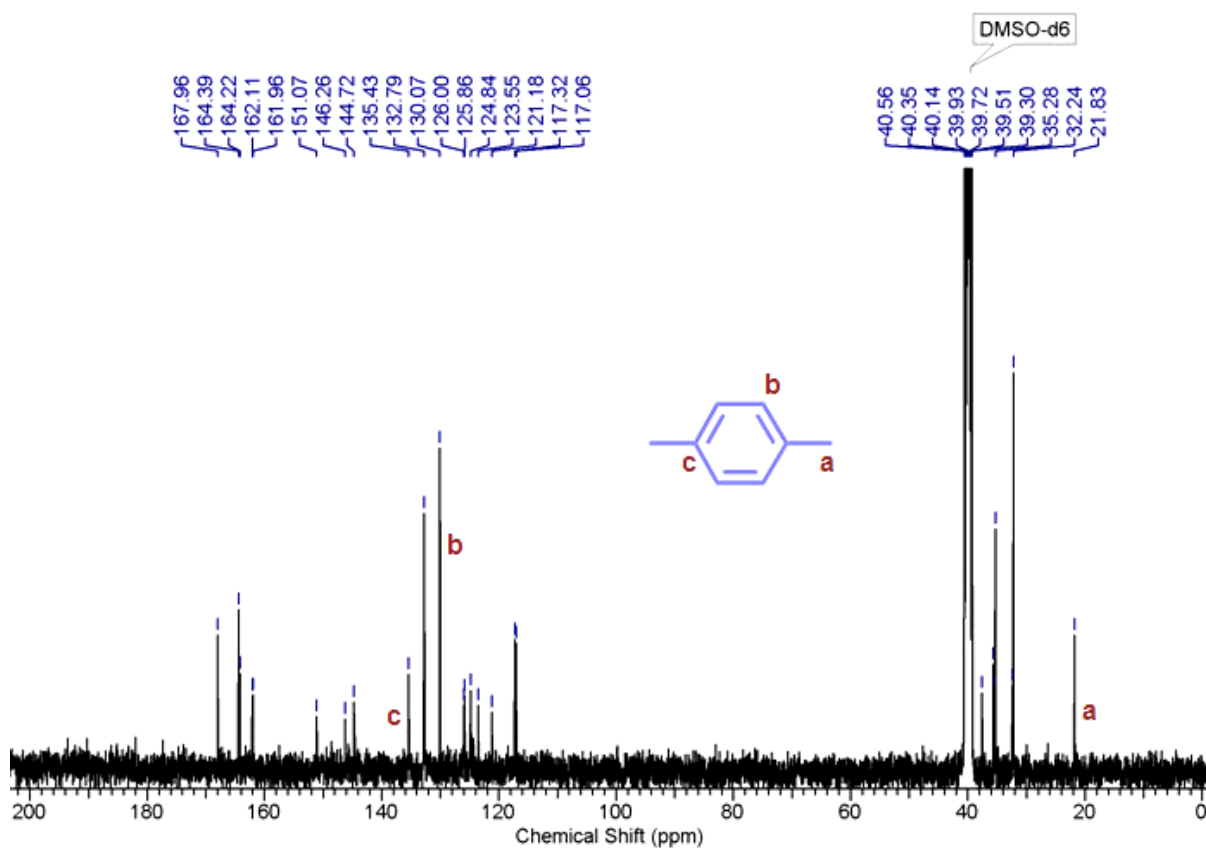

**Figure S33:**  $^{13}\text{C}$  NMR spectrum of compound **1PX'** digested in DCI/DMSO- $d_6$ .

| <b>Table S1</b> Dimensions of Adsorptive molecules ( $\text{\AA}$ ) <sup>[8]</sup><br>(each atom surrounded by a van der Waals sphere) |          |          |          |              |              |
|----------------------------------------------------------------------------------------------------------------------------------------|----------|----------|----------|--------------|--------------|
|                                                                                                                                        | <i>x</i> | <i>y</i> | <i>z</i> | <b>MIN-1</b> | <b>MIN-2</b> |
| <b>BZ</b>                                                                                                                              | 6.628    | 7.337    | 3.277    | 3.277        | 6.628        |
| <b>TL</b>                                                                                                                              | 6.625    | 4.012    | 8.252    | 4.012        | 6.625        |
| <b>CY</b>                                                                                                                              | 7.168    | 6.580    | 4.982    | 4.982        | 6.580        |
| <b>PX</b>                                                                                                                              | 6.618    | 3.81     | 9.146    | 3.81         | 6.618        |
| <b>MX</b>                                                                                                                              | 8.994    | 3.949    | 7.315    | 3.949        | 7.258        |
| <b>OX</b>                                                                                                                              | 7.269    | 3.834    | 7.826    | 3.834        | 7.269        |
| <b>EB</b>                                                                                                                              | 6.625    | 5.285    | 9.361    | 5.285        | 6.625        |

**MIN-1:** Size of the adsorptive in the minimum dimension.

**MIN-2:** Second minimum dimension for molecular orientations that enable a molecule to enter the channel.

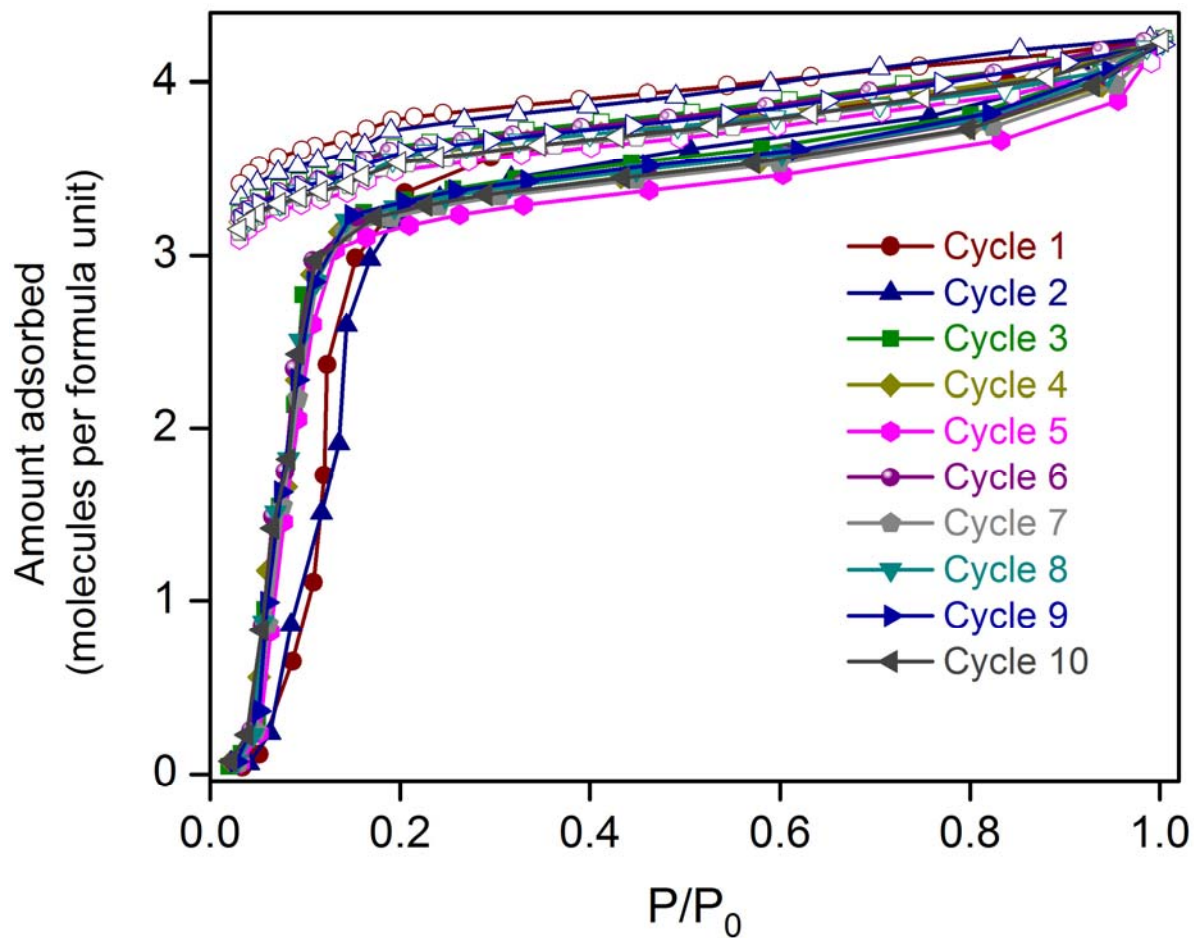

**Figure S34:** The recyclability of the PX adsorption behavior was confirmed by reproducing the same isotherm on unchanged desolvated sample **1** for ten consecutive cycles at 298 K. Filled shapes: adsorption, hollow shapes: desorption.

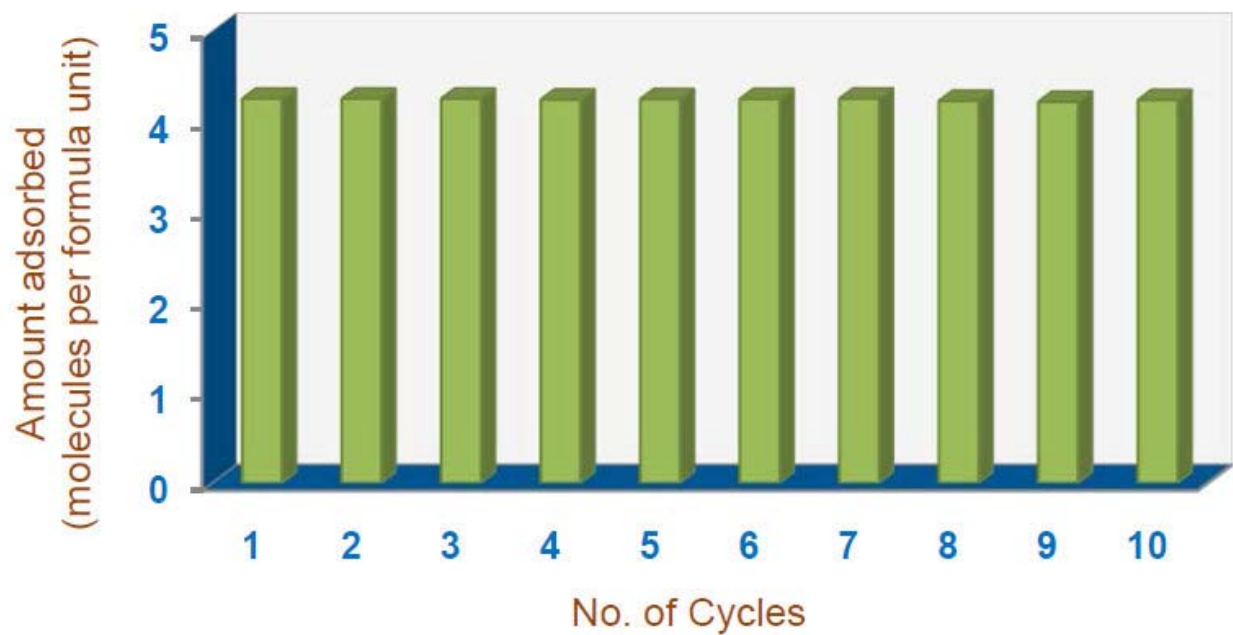

**Figure S35:** Bar diagram representation of the recyclability for the PX adsorption behavior as confirmed by reproducing the same isotherm on unchanged desolvated sample **1** for ten consecutive cycles at 298 K. Similar amounts of PX-uptake suggests the PX-sorption's recyclability behaviour for the material **1**.

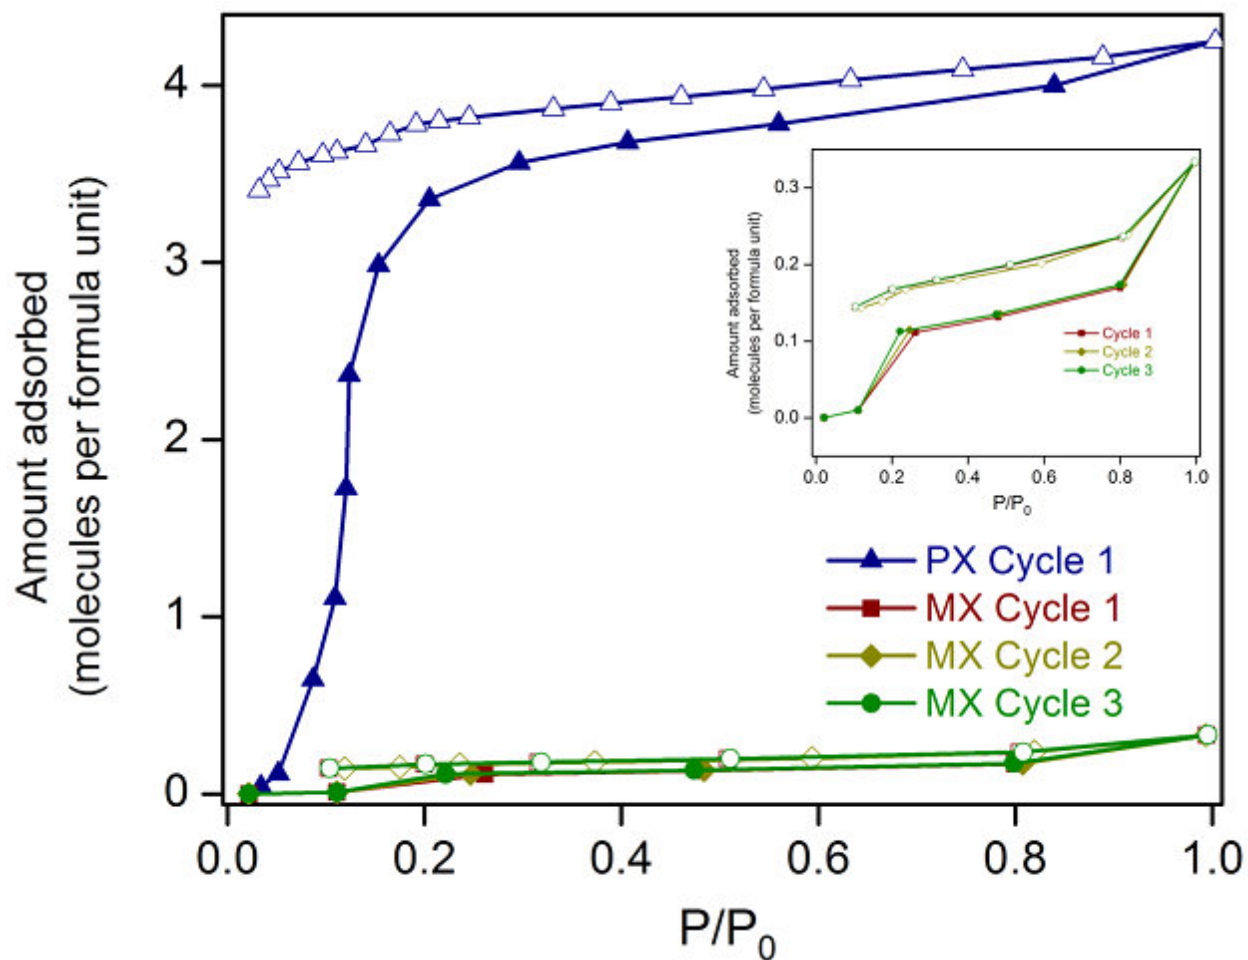

**Figure S36:** The recyclability of the MX adsorption behavior was confirmed by reproducing the same isotherm on unchanged desolvated sample **1** for three consecutive cycles at 298 K, as compared to the ‘cycle 1’ PX-sorption data; Inset: Plots for three consecutive recyclability cycles for MX. Filled shapes: adsorption, hollow shapes: desorption.

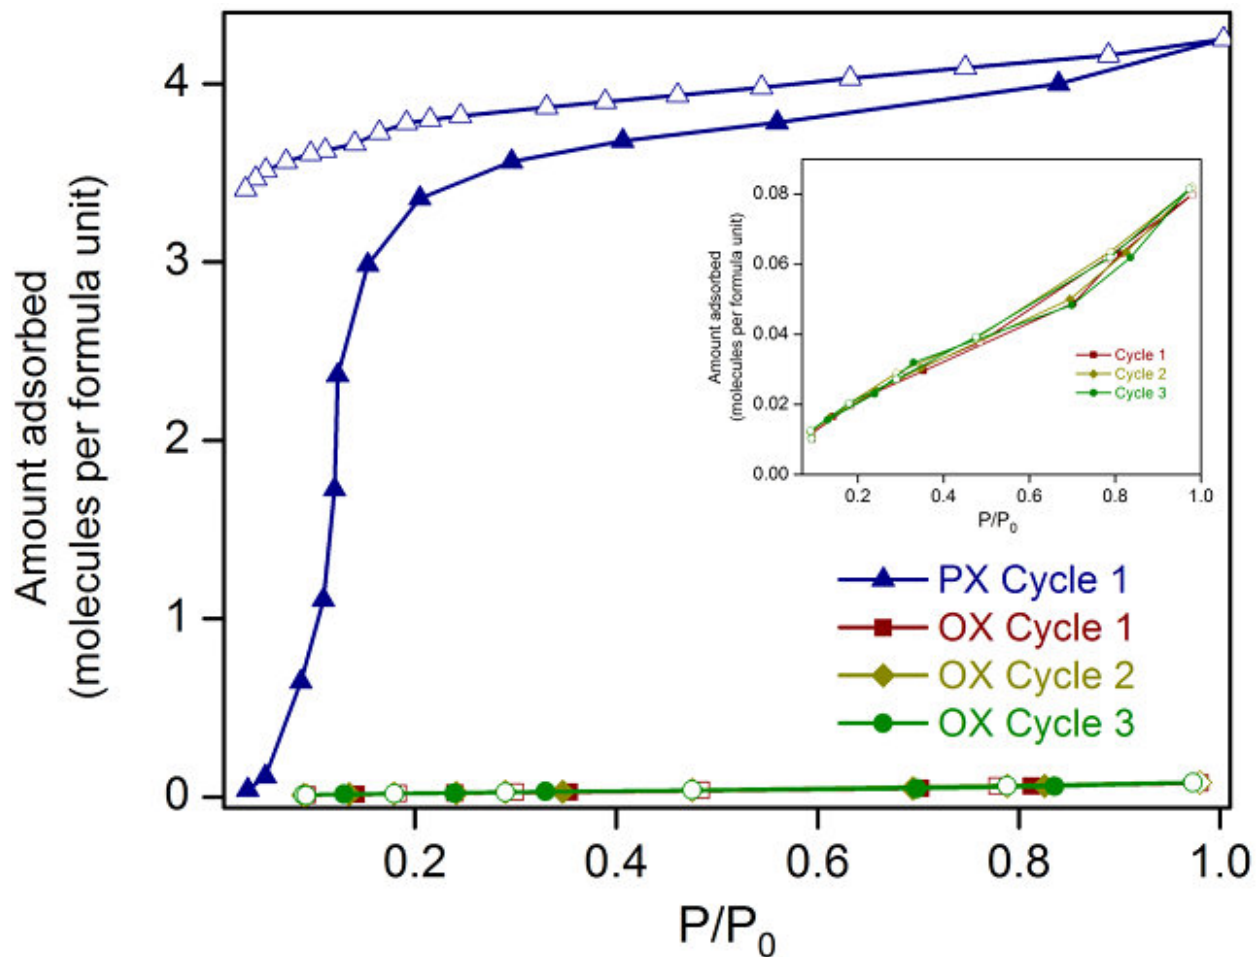

**Figure S37:** The recyclability of the OX adsorption behavior was confirmed by reproducing the same isotherm on unchanged desolvated sample **1** for three consecutive cycles at 298 K, as compared to the ‘cycle 1’ PX-sorption data; Inset: Plots for three consecutive recyclability cycles for OX. Filled shapes: adsorption, hollow shapes: desorption.



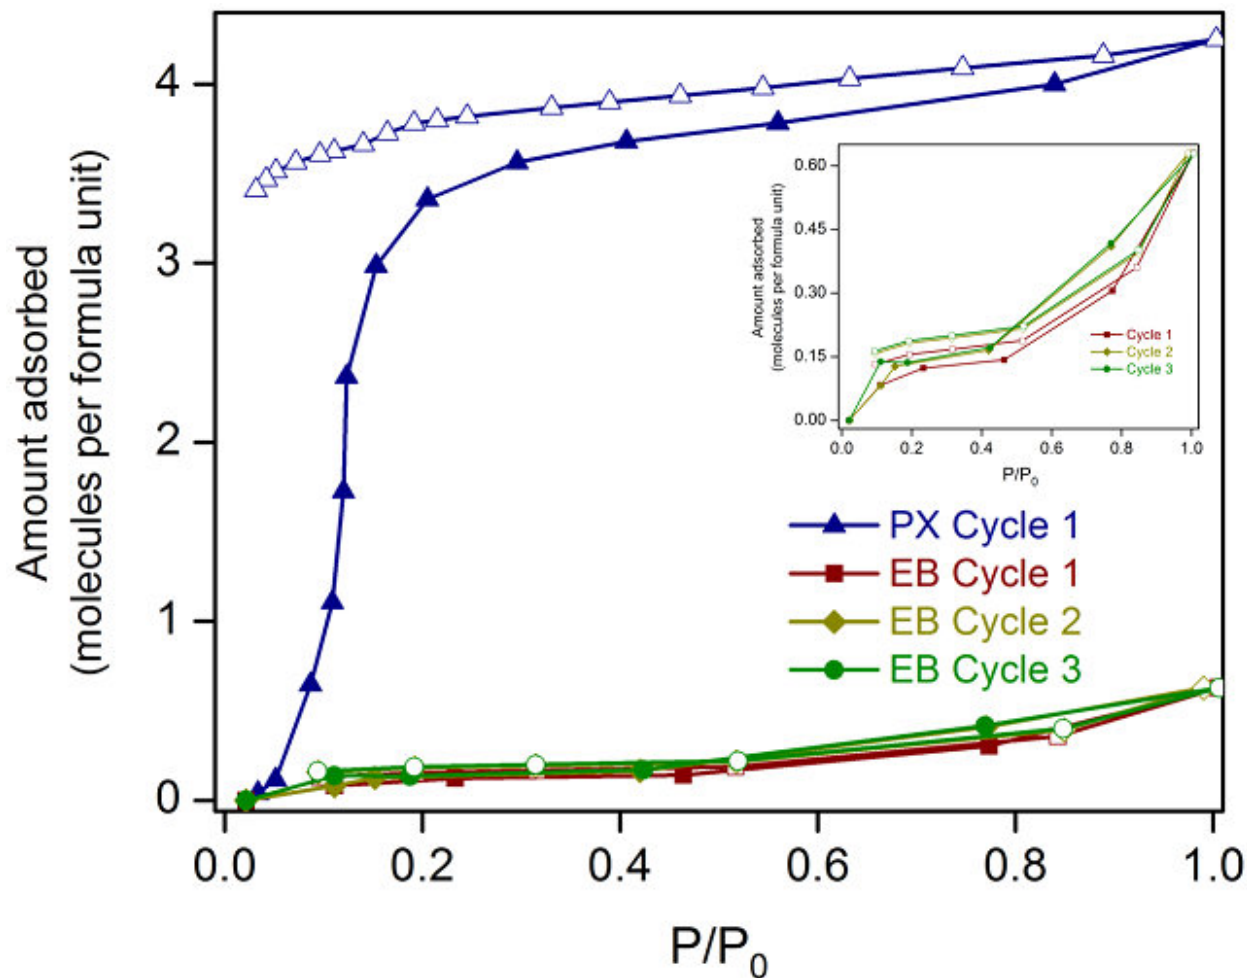

**Figure S38:** The recyclability of the EB adsorption behavior was confirmed by reproducing the same isotherm on unchanged desolvated sample **1** for three consecutive cycles at 298 K, as compared to the ‘cycle 1’ PX-sorption data; Inset: Plots for three consecutive recyclability cycles for EB. Filled shapes: adsorption, hollow shapes: desorption.

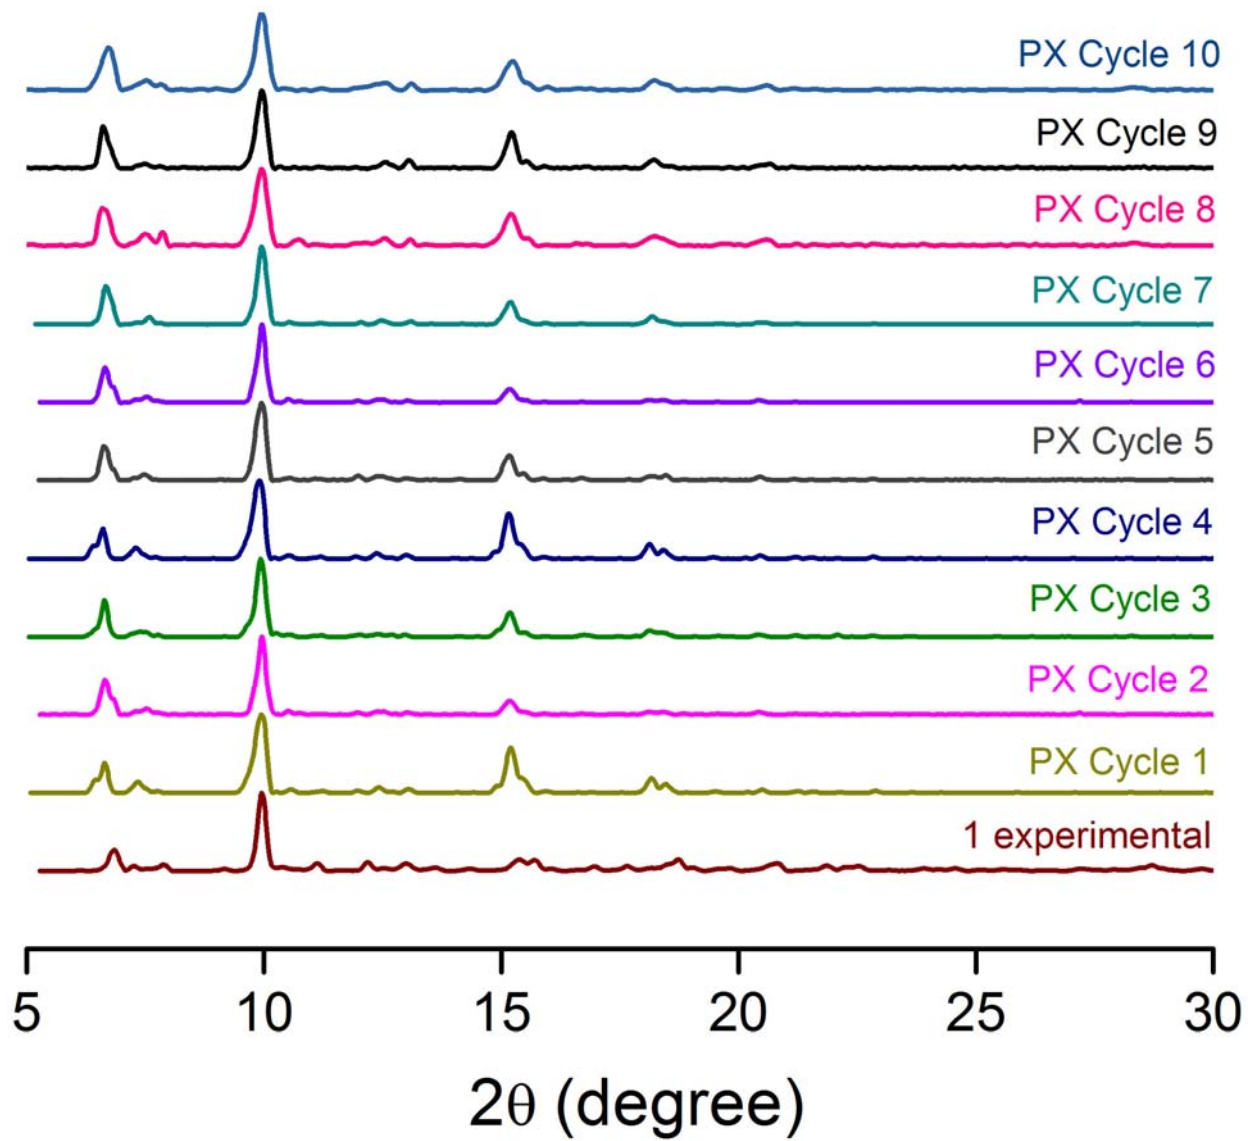

**Figure S39:** PXRD patterns for the post-desorption phases of the PX-recyclability experiments, plotted with the experimental PXRD pattern of **1**.

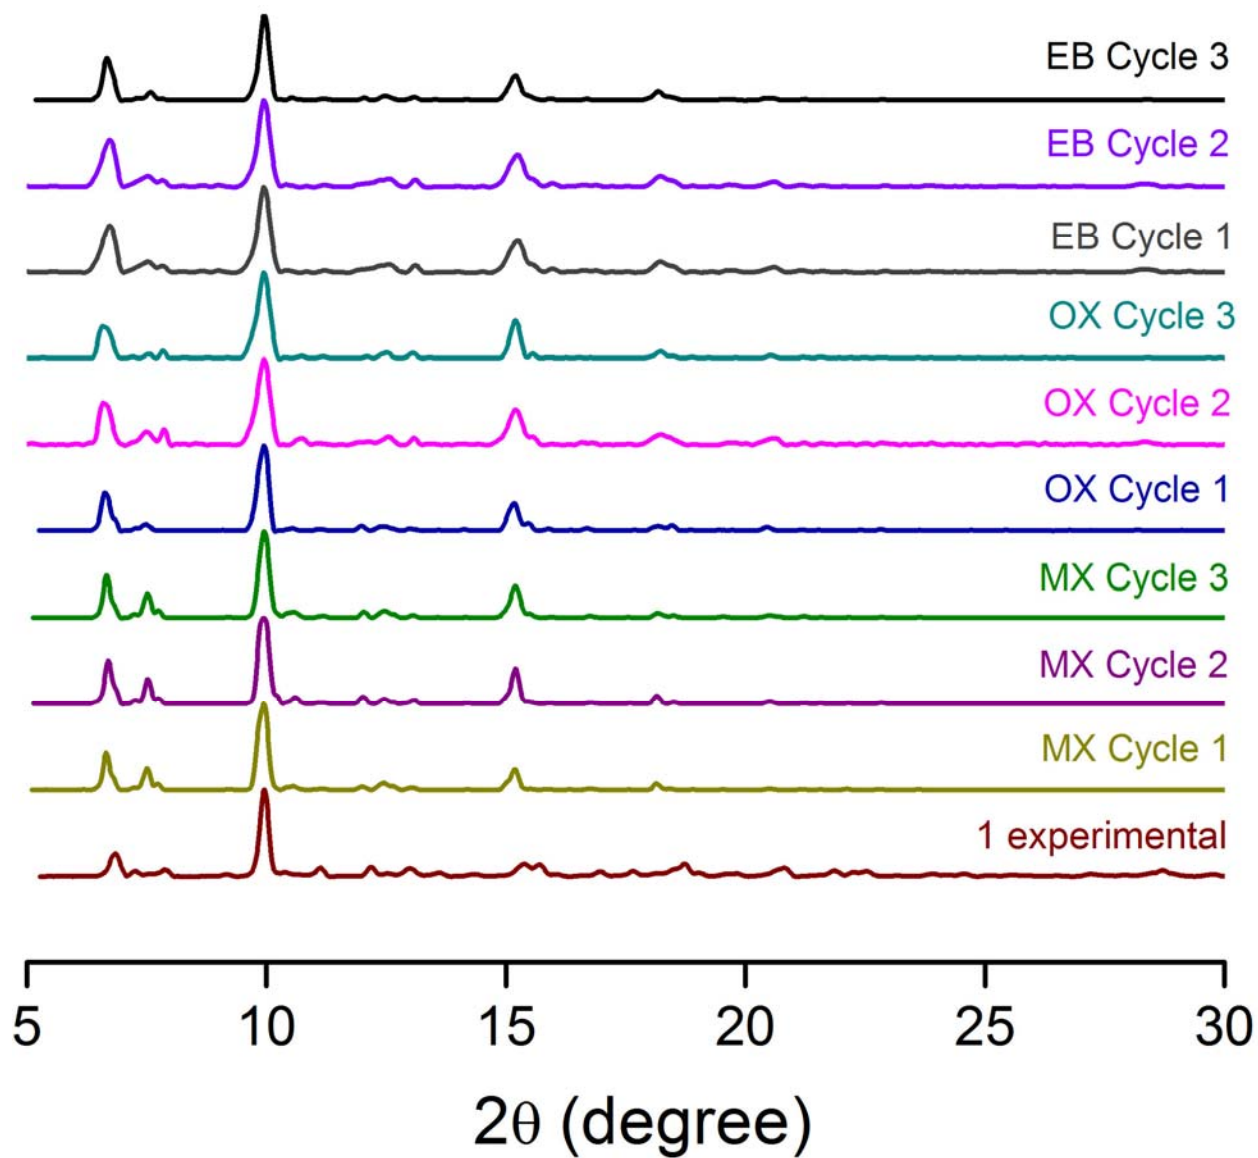

**Figure S40:** PXRD patterns for all the post-desorption phases of the MX-recyclability and OX-recyclability experiments, plotted with the experimental PXRD pattern of **1**.

**GC Instrumentation: Materials and Methods:**

GC-2014 Shimadzu Gas chromatograph (with AOC-20i Auto Injector) was used with the Column RTX-5 (Length: 30m, Inner diameter: 0.32 mm, Film thickness: 0.25  $\mu\text{m}$ ); Injection volume: 1  $\mu\text{L}$ , Injection temperature: 200  $^{\circ}\text{C}$ , Initial Column temperature: 40  $^{\circ}\text{C}$ , Column heating range: 40-70  $^{\circ}\text{C}$ , heating at 1  $^{\circ}\text{C}/\text{min}$ . With this setup, we could not obtain separate retention times for PX and MX, rather both of them were giving GC signal at similar retention times. That is why, to support the observed decrease in the mixed (PX+MX) signal intensity with time when the MOF was immersed in a quaternary mixture of xylenes, two more experiments comprising of ternary combinations of xylenes (one excluding MX, and the other excluding PX) was performed. The results (Figures S42-S44) confirm that the observed decline in the signal intensity is solely in the presence of PX. The corresponding uptake times indicate convincingly fast kinetics of the process.

**Table S2.** Crystal data and structure refinement for compound **1D**G.

|                                   |                                                                                |                        |
|-----------------------------------|--------------------------------------------------------------------------------|------------------------|
| Identification code               | Compound <b>1D</b> G                                                           |                        |
| Empirical formula                 | C <sub>78</sub> H <sub>78</sub> N <sub>2</sub> O <sub>23</sub> Zn <sub>4</sub> |                        |
| Formula weight                    | 1672.90                                                                        |                        |
| Temperature                       | 200(2) K                                                                       |                        |
| Wavelength                        | 0.71073 Å                                                                      |                        |
| Crystal system                    | Monoclinic                                                                     |                        |
| Space group                       | <i>P</i> 2 <sub>1</sub> / <i>c</i>                                             |                        |
| Unit cell dimensions              | <i>a</i> = 11.801(3) Å                                                         | <i>α</i> = 90°.        |
|                                   | <i>b</i> = 33.733(10) Å                                                        | <i>β</i> = 99.893(6)°. |
|                                   | <i>c</i> = 25.650(8) Å                                                         | <i>γ</i> = 90°.        |
| Volume                            | 10,059(5) Å <sup>3</sup>                                                       |                        |
| <i>Z</i>                          | 4                                                                              |                        |
| Density (calculated)              | 1.105 Mg/m <sup>3</sup>                                                        |                        |
| Absorption coefficient            | 1.001 mm <sup>-1</sup>                                                         |                        |
| F(000)                            | 3456                                                                           |                        |
| Crystal size                      | 0.15 x 0.13 x 0.12 mm <sup>3</sup>                                             |                        |
| Theta range for data collection   | 1.01 to 25.00°.                                                                |                        |
| Index ranges                      | -11 ≤ <i>h</i> ≤ 14, -37 ≤ <i>k</i> ≤ 39, -30 ≤ <i>l</i> ≤ 16                  |                        |
| Reflections collected             | 28853                                                                          |                        |
| Independent reflections           | 14814 [R(int) = 0.0772]                                                        |                        |
| Completeness to theta = 25.00°    | 83.7 %                                                                         |                        |
| Absorption correction             | Semi-empirical from equivalents                                                |                        |
| Max. and min. transmission        | 0.8893 and 0.8644                                                              |                        |
| Refinement method                 | Full-matrix least-squares on F <sup>2</sup>                                    |                        |
| Data / restraints / parameters    | 14814 / 171 / 920                                                              |                        |
| Goodness-of-fit on F <sup>2</sup> | 0.809                                                                          |                        |
| Final R indices [I > 2σ(I)]       | R <sub>1</sub> = 0.0787, wR <sub>2</sub> = 0.1985                              |                        |
| R indices (all data)              | R <sub>1</sub> = 0.1656, wR <sub>2</sub> = 0.2154                              |                        |
| Largest diff. peak and hole       | 0.628 and -0.672 e.Å <sup>-3</sup>                                             |                        |

**Table S3.** Crystal data and structure refinement for compound **1**.

|                                   |                                                                 |                         |
|-----------------------------------|-----------------------------------------------------------------|-------------------------|
| Identification code               | Compound <b>1</b>                                               |                         |
| Empirical formula                 | C <sub>72</sub> H <sub>60</sub> O <sub>19</sub> Zn <sub>4</sub> |                         |
| Formula weight                    | 1490.68                                                         |                         |
| Temperature                       | 200(2) K                                                        |                         |
| Wavelength                        | 0.71073 Å                                                       |                         |
| Crystal system                    | Monoclinic                                                      |                         |
| Space group                       | <i>P2<sub>1</sub>/c</i>                                         |                         |
| Unit cell dimensions              | <i>a</i> = 12.306(9) Å                                          | <i>α</i> = 90°.         |
|                                   | <i>b</i> = 26.370(18) Å                                         | <i>β</i> = 96.549(13)°. |
|                                   | <i>c</i> = 22.124(16) Å                                         | <i>γ</i> = 90°.         |
| Volume                            | 7133(9) Å <sup>3</sup>                                          |                         |
| Z                                 | 4                                                               |                         |
| Density (calculated)              | 1.388 Mg/m <sup>3</sup>                                         |                         |
| Absorption coefficient            | 1.398 mm <sup>-1</sup>                                          |                         |
| F(000)                            | 3056                                                            |                         |
| Crystal size                      | 0.15 x 0.12 x 0.10 mm <sup>3</sup>                              |                         |
| Theta range for data collection   | 1.21 to 25.00°.                                                 |                         |
| Index ranges                      | -14 ≤ <i>h</i> ≤ 14, -31 ≤ <i>k</i> ≤ 31, -26 ≤ <i>l</i> ≤ 26   |                         |
| Reflections collected             | 95666                                                           |                         |
| Independent reflections           | 12514 [R(int) = 0.2480]                                         |                         |
| Completeness to theta = 25.00°    | 99.5 %                                                          |                         |
| Max. and min. transmission        | 0.8729 and 0.8177                                               |                         |
| Refinement method                 | Full-matrix least-squares on F <sup>2</sup>                     |                         |
| Data / restraints / parameters    | 12514 / 78 / 865                                                |                         |
| Goodness-of-fit on F <sup>2</sup> | 0.910                                                           |                         |
| Final R indices [I > 2σ(I)]       | R <sub>1</sub> = 0.1106, wR <sub>2</sub> = 0.2622               |                         |
| R indices (all data)              | R <sub>1</sub> = 0.2897, wR <sub>2</sub> = 0.3313               |                         |
| Largest diff. peak and hole       | 0.996 and -0.593 e.Å <sup>-3</sup>                              |                         |

**Table S4.** Crystal data and structure refinement for Compound **1▷PX'**.

|                                   |                                                                                |                        |
|-----------------------------------|--------------------------------------------------------------------------------|------------------------|
| Identification code               | Compound <b>1▷PX'</b>                                                          |                        |
| Empirical formula                 | C <sub>86</sub> H <sub>84</sub> N <sub>2</sub> O <sub>21</sub> Zn <sub>4</sub> |                        |
| Formula weight                    | 1743.03                                                                        |                        |
| Temperature                       | 200(2) K                                                                       |                        |
| Wavelength                        | 0.71069 Å                                                                      |                        |
| Crystal system                    | Monoclinic                                                                     |                        |
| Space group                       | <i>P2<sub>1</sub>/c</i>                                                        |                        |
| Unit cell dimensions              | <i>a</i> = 12.080(5) Å                                                         | <i>α</i> = 90.000(5)°. |
|                                   | <i>b</i> = 32.556(5) Å                                                         | <i>β</i> = 97.830(5)°. |
|                                   | <i>c</i> = 25.722(5) Å                                                         | <i>γ</i> = 90.000(5)°. |
| Volume                            | 10022(5) Å <sup>3</sup>                                                        |                        |
| Z                                 | 4                                                                              |                        |
| Density (calculated)              | 1.155 Mg/m <sup>3</sup>                                                        |                        |
| Absorption coefficient            | 1.006 mm <sup>-1</sup>                                                         |                        |
| F(000)                            | 3608                                                                           |                        |
| Crystal size                      | 0.14 x 0.11 x 0.10 mm <sup>3</sup>                                             |                        |
| Theta range for data collection   | 1.48 to 16.80°.                                                                |                        |
| Index ranges                      | -9<= <i>h</i> <=9, -26<= <i>k</i> <=25, -19<= <i>l</i> <=20                    |                        |
| Reflections collected             | 28529                                                                          |                        |
| Independent reflections           | 5363 [R(int) = 0.0419]                                                         |                        |
| Completeness to theta = 16.80°    | 94.9 %                                                                         |                        |
| Max. and min. transmission        | 0.9061 and 0.8720                                                              |                        |
| Refinement method                 | Full-matrix least-squares on F <sup>2</sup>                                    |                        |
| Data / restraints / parameters    | 5363 / 284 / 966                                                               |                        |
| Goodness-of-fit on F <sup>2</sup> | 1.044                                                                          |                        |
| Final R indices [I>2σ(I)]         | R <sub>1</sub> = 0.0976, wR <sub>2</sub> = 0.2626                              |                        |
| R indices (all data)              | R <sub>1</sub> = 0.1055, wR <sub>2</sub> = 0.2704                              |                        |
| Largest diff. peak and hole       | 1.480 and -0.674 e.Å <sup>-3</sup>                                             |                        |

Table S5. Atomic coordinates ( $\times 10^4$ ) and equivalent isotropic displacement parameters ( $\text{\AA}^2 \times 10^3$ ) for compound **1D**G.  $U(\text{eq})$  is defined as one third of the trace of the orthogonalized  $U_{ij}$  tensor.

|       | x         | y       | z       | $U(\text{eq})$ |
|-------|-----------|---------|---------|----------------|
| C(1)  | -1152(10) | 4183(3) | 3528(5) | 61(3)          |
| C(2)  | -1943(9)  | 3994(3) | 3855(4) | 56(3)          |
| C(3)  | -3087(9)  | 3885(3) | 3630(4) | 71(3)          |
| C(4)  | -3848(11) | 3723(3) | 3909(4) | 86(4)          |
| C(5)  | -3444(11) | 3667(3) | 4432(6) | 77(4)          |
| C(6)  | -2326(13) | 3768(3) | 4670(4) | 100(4)         |
| C(7)  | -1561(9)  | 3928(3) | 4380(4) | 73(3)          |
| C(8)  | -5326(13) | 3536(4) | 4655(5) | 94(4)          |
| C(9)  | -5820(12) | 3904(5) | 4556(5) | 99(5)          |
| C(10) | -7090(10) | 3930(5) | 4459(4) | 103(4)         |
| C(11) | -7648(14) | 3587(4) | 4493(5) | 127(6)         |
| C(12) | -7217(11) | 3204(4) | 4584(5) | 95(4)          |
| C(13) | -6072(11) | 3214(4) | 4665(5) | 116(3)         |
| C(14) | -7994(11) | 2887(4) | 4603(5) | 189(9)         |
| C(15) | -8762(14) | 2846(6) | 4072(6) | 249(12)        |
| C(16) | -8760(14) | 2934(6) | 5007(7) | 286(13)        |
| C(17) | -7341(18) | 2503(5) | 4710(9) | 400(20)        |
| C(18) | 1856(11)  | 3856(3) | 2719(5) | 81(3)          |
| C(19) | 2613(7)   | 3502(2) | 2768(4) | 136(3)         |
| C(20) | 2789(8)   | 3305(3) | 2313(3) | 153(3)         |
| C(21) | 3482(9)   | 2969(3) | 2352(3) | 164(3)         |
| C(22) | 3999(7)   | 2831(2) | 2846(4) | 198(5)         |
| C(23) | 3823(7)   | 3028(2) | 3301(3) | 80(3)          |
| C(24) | 3130(7)   | 3363(2) | 3262(3) | 82(3)          |
| C(35) | 2206(9)   | 5023(4) | 1816(4) | 75(4)          |
| C(36) | 3021(10)  | 5123(4) | 1450(4) | 86(4)          |
| C(37) | 4006(12)  | 5341(4) | 1625(5) | 129(5)         |
| C(38) | 4868(14)  | 5407(5) | 1290(5) | 163(7)         |
| C(39) | 4538(13)  | 5272(5) | 786(5)  | 135(6)         |



|       |           |         |         |         |
|-------|-----------|---------|---------|---------|
| C(40) | 3589(11)  | 5060(4) | 620(5)  | 108(5)  |
| C(41) | 2867(10)  | 4975(4) | 959(4)  | 95(4)   |
| C(42) | 7343(9)   | 5467(2) | 634(3)  | 138(6)  |
| C(43) | 6182(7)   | 5563(3) | 513(4)  | 116(6)  |
| C(44) | 5847(6)   | 5944(4) | 348(3)  | 121(4)  |
| C(45) | 6674(9)   | 6230(3) | 304(3)  | 149(4)  |
| C(46) | 7836(8)   | 6134(3) | 424(3)  | 146(5)  |
| C(47) | 8170(5)   | 5753(3) | 589(3)  | 83(4)   |
| C(67) | -1524(8)  | 6062(2) | 2184(3) | 88(4)   |
| C(68) | -955(6)   | 6416(3) | 2127(4) | 130(5)  |
| C(69) | -1578(10) | 6751(2) | 1941(5) | 190(9)  |
| C(70) | -2770(9)  | 6733(3) | 1811(5) | 213(11) |
| C(71) | -3339(6)  | 6379(3) | 1868(5) | 192(8)  |
| C(72) | -2716(8)  | 6044(2) | 2055(4) | 134(6)  |
| C(25) | 5092(15)  | 2334(3) | 3355(4) | 193(5)  |
| C(26) | 6197(13)  | 2394(3) | 3633(7) | 204(9)  |
| C(27) | 6540(8)   | 2211(3) | 4120(6) | 201(10) |
| C(28) | 5778(12)  | 1967(3) | 4328(4) | 235(8)  |
| C(29) | 4674(10)  | 1907(3) | 4049(7) | 240(7)  |
| C(30) | 4330(9)   | 2091(4) | 3563(6) | 245(8)  |
| C(48) | 9480(14)  | 5661(5) | 667(6)  | 242(12) |
| C(49) | 10106(17) | 5980(5) | 985(7)  | 264(11) |
| C(50) | 9744(12)  | 5633(6) | 117(5)  | 281(13) |
| C(51) | 9540(20)  | 5271(6) | 949(9)  | 380(20) |
| C(52) | -1757(8)  | 4399(3) | 1583(5) | 69(3)   |
| C(53) | -2609(11) | 4267(3) | 1115(5) | 101(4)  |
| C(54) | -2208(12) | 4117(4) | 658(6)  | 128(5)  |
| C(55) | -2956(14) | 3995(5) | 215(7)  | 167(7)  |
| C(56) | -4136(13) | 4039(4) | 232(8)  | 143(6)  |
| C(57) | -4582(11) | 4210(5) | 672(6)  | 128(5)  |
| C(58) | -3800(9)  | 4344(3) | 1074(5) | 92(4)   |
| C(59) | 2300(8)   | 5132(4) | 3749(4) | 61(3)   |
| C(60) | 3135(9)   | 5313(3) | 4199(4) | 67(3)   |
| C(61) | 3834(9)   | 5625(3) | 4131(4) | 77(3)   |
| C(62) | 4593(9)   | 5770(3) | 4561(5) | 81(3)   |
| C(63) | 4557(10)  | 5615(4) | 5037(5) | 73(3)   |

|       |           |         |         |         |
|-------|-----------|---------|---------|---------|
| C(64) | 3899(10)  | 5318(4) | 5123(4) | 78(3)   |
| C(65) | 3186(9)   | 5155(3) | 4723(4) | 71(3)   |
| C(66) | -892(9)   | 5688(3) | 2352(4) | 56(3)   |
| C(73) | -1458(13) | 5310(4) | 3634(5) | 106(5)  |
| C(74) | -312(17)  | 5283(6) | 4433(7) | 270(13) |
| C(75) | -2081(15) | 5691(5) | 4327(7) | 209(9)  |
| C(76) | -3833(10) | 4682(4) | 2671(5) | 84(4)   |
| C(77) | -5676(9)  | 4386(4) | 2717(6) | 160(7)  |
| C(78) | -5106(10) | 5029(5) | 3151(6) | 151(6)  |
| N(1)  | -4848(8)  | 4709(3) | 2833(4) | 99(3)   |
| N(2)  | -1340(13) | 5443(4) | 4058(6) | 130(5)  |
| O(1)  | -140(6)   | 4235(2) | 3736(3) | 68(2)   |
| O(2)  | -1574(6)  | 4286(2) | 3065(3) | 76(2)   |
| O(3)  | -4112(8)  | 3503(2) | 4780(3) | 99(2)   |
| O(4)  | -2090(5)  | 4568(2) | 1957(3) | 69(2)   |
| O(5)  | -720(6)   | 4315(2) | 1554(3) | 89(2)   |
| O(6)  | -1457(6)  | 5385(2) | 2311(3) | 88(2)   |
| O(7)  | 2211(6)   | 5249(2) | 2225(3) | 80(2)   |
| O(8)  | 1573(6)   | 4731(2) | 1699(3) | 78(2)   |
| O(9)  | 5315(9)   | 5306(3) | 424(4)  | 160(4)  |
| O(10) | 2143(5)   | 5343(2) | 3347(3) | 64(2)   |
| O(11) | 1882(6)   | 4805(2) | 3831(3) | 70(2)   |
| O(12) | 5289(6)   | 5755(2) | 5489(3) | 89(2)   |
| O(13) | 1411(7)   | 3967(2) | 2278(3) | 94(3)   |
| O(14) | 1815(5)   | 4040(2) | 3131(3) | 67(2)   |
| O(15) | 4749(12)  | 2510(3) | 2904(5) | 219(4)  |
| O(16) | 3258(12)  | 2079(3) | 3364(9) | 406(16) |
| O(17) | -3097(6)  | 4950(2) | 2746(3) | 82(2)   |
| O(18) | -864(6)   | 5122(2) | 3401(3) | 85(2)   |
| O(19) | 280(4)    | 4752(2) | 2688(2) | 55(2)   |
| O(20) | -4752(9)  | 3942(4) | -246(5) | 202(6)  |
| O(21) | 166(6)    | 5722(2) | 2507(3) | 76(2)   |
| Zn(1) | -1424(1)  | 4839(1) | 2648(1) | 59(1)   |
| Zn(2) | 843(1)    | 4482(1) | 3319(1) | 55(1)   |
| Zn(3) | 559(1)    | 4454(1) | 2086(1) | 60(1)   |
| Zn(4) | 1057(1)   | 5255(1) | 2688(1) | 59(1)   |

|       |          |         |          |         |
|-------|----------|---------|----------|---------|
| C(31) | 7650(20) | 2278(5) | 4485(10) | 305(15) |
| C(32) | 8440(20) | 2033(7) | 4215(10) | 306(15) |
| C(33) | 8142(16) | 2686(4) | 4512(11) | 357(19) |
| C(34) | 7840(40) | 2130(8) | 5048(10) | 720(60) |
| O(1W) | 7685(17) | 6329(6) | 8948(5)  | 350(11) |
| O(2W) | 3177(16) | 6383(6) | 2421(8)  | 361(11) |

---

**Table S6.** Bond lengths [ $\text{\AA}$ ] and angles [ $^\circ$ ] for compound **1D**G.

---

|              |           |
|--------------|-----------|
| C(1)-O(1)    | 1.233(12) |
| C(1)-O(2)    | 1.253(11) |
| C(1)-C(2)    | 1.502(13) |
| C(2)-C(7)    | 1.361(12) |
| C(2)-C(3)    | 1.423(12) |
| C(3)-C(4)    | 1.355(12) |
| C(3)-H(3)    | 0.9300    |
| C(4)-C(5)    | 1.357(14) |
| C(4)-H(4)    | 0.9300    |
| C(5)-C(6)    | 1.397(15) |
| C(5)-O(3)    | 1.403(12) |
| C(6)-C(7)    | 1.375(13) |
| C(6)-H(6)    | 0.9300    |
| C(7)-H(7)    | 0.9300    |
| C(8)-C(9)    | 1.377(17) |
| C(8)-C(13)   | 1.400(14) |
| C(8)-O(3)    | 1.418(15) |
| C(9)-O(12)#1 | 1.324(14) |
| C(9)-C(10)   | 1.480(17) |
| C(10)-C(11)  | 1.343(14) |
| C(10)-H(10)  | 0.9300    |
| C(11)-C(12)  | 1.392(17) |
| C(11)-H(11)  | 0.9300    |
| C(12)-C(13)  | 1.331(16) |
| C(12)-C(14)  | 1.415(9)  |
| C(13)-H(13)  | 0.9300    |
| C(14)-C(16)  | 1.497(9)  |
| C(14)-C(15)  | 1.508(9)  |
| C(14)-C(17)  | 1.510(10) |
| C(15)-H(15A) | 0.9600    |
| C(15)-H(15B) | 0.9600    |
| C(15)-H(15C) | 0.9600    |
| C(16)-H(16A) | 0.9600    |
| C(16)-H(16B) | 0.9600    |

|              |           |
|--------------|-----------|
| C(16)-H(16C) | 0.9600    |
| C(17)-H(17A) | 0.9600    |
| C(17)-H(17B) | 0.9600    |
| C(17)-H(17C) | 0.9600    |
| C(18)-O(13)  | 1.221(12) |
| C(18)-O(14)  | 1.235(11) |
| C(18)-C(19)  | 1.484(12) |
| C(19)-C(20)  | 1.3900    |
| C(19)-C(24)  | 1.3900    |
| C(20)-C(21)  | 1.3900    |
| C(20)-H(20)  | 0.9300    |
| C(21)-C(22)  | 1.3900    |
| C(21)-H(21)  | 0.9300    |
| C(22)-C(23)  | 1.3900    |
| C(22)-O(15)  | 1.390(10) |
| C(23)-C(24)  | 1.3900    |
| C(23)-H(23)  | 0.9300    |
| C(24)-H(24)  | 0.9300    |
| C(35)-O(8)   | 1.241(12) |
| C(35)-O(7)   | 1.297(12) |
| C(35)-C(36)  | 1.494(13) |
| C(36)-C(41)  | 1.338(13) |
| C(36)-C(37)  | 1.383(14) |
| C(37)-C(38)  | 1.457(15) |
| C(37)-H(37)  | 0.9300    |
| C(38)-C(39)  | 1.362(16) |
| C(38)-H(38)  | 0.9300    |
| C(39)-C(40)  | 1.336(15) |
| C(39)-O(9)   | 1.418(12) |
| C(40)-C(41)  | 1.348(13) |
| C(40)-H(40)  | 0.9300    |
| C(41)-H(41)  | 0.9300    |
| C(42)-C(43)  | 1.3900    |
| C(42)-C(47)  | 1.3900    |
| C(42)-H(42)  | 0.9300    |
| C(43)-O(9)   | 1.330(7)  |

|               |           |
|---------------|-----------|
| C(43)-C(44)   | 1.3900    |
| C(44)-O(20)#2 | 1.331(11) |
| C(44)-C(45)   | 1.3900    |
| C(45)-C(46)   | 1.3900    |
| C(45)-H(45)   | 0.9300    |
| C(46)-C(47)   | 1.3900    |
| C(46)-H(46)   | 0.9300    |
| C(47)-C(48)   | 1.556(17) |
| C(67)-C(68)   | 1.3900    |
| C(67)-C(72)   | 1.3900    |
| C(67)-C(66)   | 1.490(11) |
| C(68)-C(69)   | 1.3900    |
| C(68)-H(68)   | 0.9300    |
| C(69)-C(70)   | 1.3900    |
| C(69)-H(69)   | 0.9300    |
| C(70)-O(16)#3 | 1.344(12) |
| C(70)-C(71)   | 1.3900    |
| C(71)-C(72)   | 1.3900    |
| C(71)-H(71)   | 0.9300    |
| C(72)-H(72)   | 0.9300    |
| C(25)-O(15)   | 1.301(13) |
| C(25)-C(26)   | 1.3900    |
| C(25)-C(30)   | 1.3900    |
| C(26)-C(27)   | 1.3900    |
| C(26)-H(26)   | 0.9300    |
| C(27)-C(28)   | 1.3900    |
| C(27)-C(31)   | 1.49(2)   |
| C(28)-C(29)   | 1.3900    |
| C(28)-H(28)   | 0.9300    |
| C(29)-C(30)   | 1.3900    |
| C(29)-H(29)   | 0.9300    |
| C(30)-O(16)   | 1.282(13) |
| C(48)-C(49)   | 1.469(10) |
| C(48)-C(51)   | 1.497(10) |
| C(48)-C(50)   | 1.498(9)  |
| C(49)-H(49A)  | 0.9600    |

|              |           |
|--------------|-----------|
| C(49)-H(49B) | 0.9600    |
| C(49)-H(49C) | 0.9600    |
| C(50)-H(50A) | 0.9600    |
| C(50)-H(50B) | 0.9600    |
| C(50)-H(50C) | 0.9600    |
| C(51)-H(51A) | 0.9600    |
| C(51)-H(51B) | 0.9600    |
| C(51)-H(51C) | 0.9600    |
| C(52)-O(4)   | 1.236(11) |
| C(52)-O(5)   | 1.271(10) |
| C(52)-C(53)  | 1.496(15) |
| C(53)-C(58)  | 1.414(14) |
| C(53)-C(54)  | 1.430(14) |
| C(54)-C(55)  | 1.376(17) |
| C(54)-H(54)  | 0.9300    |
| C(55)-C(56)  | 1.409(18) |
| C(55)-H(55)  | 0.9300    |
| C(56)-O(20)  | 1.355(17) |
| C(56)-C(57)  | 1.443(17) |
| C(57)-C(58)  | 1.338(15) |
| C(57)-H(57)  | 0.9300    |
| C(58)-H(58)  | 0.9300    |
| C(59)-O(10)  | 1.241(11) |
| C(59)-O(11)  | 1.243(12) |
| C(59)-C(60)  | 1.510(14) |
| C(60)-C(61)  | 1.368(12) |
| C(60)-C(65)  | 1.436(13) |
| C(61)-C(62)  | 1.385(13) |
| C(61)-H(61)  | 0.9300    |
| C(62)-C(63)  | 1.335(14) |
| C(62)-H(62)  | 0.9300    |
| C(63)-C(64)  | 1.310(13) |
| C(63)-O(12)  | 1.404(12) |
| C(64)-C(65)  | 1.330(13) |
| C(64)-H(64)  | 0.9300    |
| C(65)-H(65)  | 0.9300    |

|              |           |
|--------------|-----------|
| C(66)-O(6)   | 1.215(10) |
| C(66)-O(21)  | 1.248(11) |
| C(73)-N(2)   | 1.163(14) |
| C(73)-O(18)  | 1.180(13) |
| C(73)-H(73)  | 0.9300    |
| C(74)-N(2)   | 1.512(10) |
| C(74)-H(74A) | 0.9600    |
| C(74)-H(74B) | 0.9600    |
| C(74)-H(74C) | 0.9600    |
| C(75)-N(2)   | 1.465(15) |
| C(75)-H(75A) | 0.9600    |
| C(75)-H(75B) | 0.9600    |
| C(75)-H(75C) | 0.9600    |
| C(76)-O(17)  | 1.246(11) |
| C(76)-N(1)   | 1.336(12) |
| C(76)-H(76)  | 0.9300    |
| C(77)-N(1)   | 1.458(13) |
| C(77)-H(77A) | 0.9600    |
| C(77)-H(77B) | 0.9600    |
| C(77)-H(77C) | 0.9600    |
| C(78)-N(1)   | 1.418(13) |
| C(78)-H(78A) | 0.9600    |
| C(78)-H(78B) | 0.9600    |
| C(78)-H(78C) | 0.9600    |
| O(1)-Zn(2)   | 1.901(6)  |
| O(2)-Zn(1)   | 2.175(7)  |
| O(4)-Zn(1)   | 2.029(7)  |
| O(5)-Zn(3)   | 1.912(7)  |
| O(6)-Zn(1)   | 2.032(8)  |
| O(7)-Zn(4)   | 1.954(6)  |
| O(8)-Zn(3)   | 1.923(7)  |
| O(10)-Zn(4)  | 1.962(7)  |
| O(11)-Zn(2)  | 1.966(6)  |
| O(12)-C(9)#1 | 1.324(14) |
| O(13)-Zn(3)  | 1.945(7)  |
| O(14)-Zn(2)  | 1.988(6)  |



|                |            |
|----------------|------------|
| O(16)-C(70)#4  | 1.34(2)    |
| O(17)-Zn(1)    | 2.067(6)   |
| O(18)-Zn(1)    | 2.155(7)   |
| O(19)-Zn(2)    | 1.875(6)   |
| O(19)-Zn(3)    | 1.918(5)   |
| O(19)-Zn(4)    | 1.931(5)   |
| O(19)-Zn(1)    | 2.017(5)   |
| O(20)-C(44)#2  | 1.33(7)    |
| O(21)-Zn(4)    | 1.904(7)   |
| Zn(2)-Zn(4)    | 3.1041(17) |
| Zn(2)-Zn(3)    | 3.1232(18) |
| Zn(3)-Zn(4)    | 3.1182(17) |
| C(31)-C(33)    | 1.493(10)  |
| C(31)-C(32)    | 1.500(10)  |
| C(31)-C(34)    | 1.508(9)   |
| C(32)-H(32A)   | 0.9600     |
| C(32)-H(32B)   | 0.9600     |
| C(32)-H(32C)   | 0.9600     |
| C(33)-H(33A)   | 0.9600     |
| C(33)-H(33B)   | 0.9600     |
| C(33)-H(33C)   | 0.9600     |
| C(34)-H(34A)   | 0.9600     |
| C(34)-H(34B)   | 0.9600     |
| C(34)-H(34C)   | 0.9600     |
| O(1)-C(1)-O(2) | 124.7(10)  |
| O(1)-C(1)-C(2) | 117.7(10)  |
| O(2)-C(1)-C(2) | 117.5(10)  |
| C(7)-C(2)-C(3) | 119.3(9)   |
| C(7)-C(2)-C(1) | 119.4(10)  |
| C(3)-C(2)-C(1) | 121.3(9)   |
| C(4)-C(3)-C(2) | 123.9(10)  |
| C(4)-C(3)-H(3) | 118.0      |
| C(2)-C(3)-H(3) | 118.0      |
| C(3)-C(4)-C(5) | 115.2(11)  |
| C(3)-C(4)-H(4) | 122.4      |

|                    |           |
|--------------------|-----------|
| C(5)-C(4)-H(4)     | 122.4     |
| C(4)-C(5)-C(6)     | 122.9(11) |
| C(4)-C(5)-O(3)     | 122.9(11) |
| C(6)-C(5)-O(3)     | 114.2(12) |
| C(7)-C(6)-C(5)     | 121.2(11) |
| C(7)-C(6)-H(6)     | 119.4     |
| C(5)-C(6)-H(6)     | 119.4     |
| C(2)-C(7)-C(6)     | 117.5(10) |
| C(2)-C(7)-H(7)     | 121.2     |
| C(6)-C(7)-H(7)     | 121.2     |
| C(9)-C(8)-C(13)    | 117.0(15) |
| C(9)-C(8)-O(3)     | 119.5(11) |
| C(13)-C(8)-O(3)    | 123.3(15) |
| O(12)#1-C(9)-C(8)  | 127.4(13) |
| O(12)#1-C(9)-C(10) | 114.5(15) |
| C(8)-C(9)-C(10)    | 118.0(14) |
| C(11)-C(10)-C(9)   | 115.5(15) |
| C(11)-C(10)-H(10)  | 122.2     |
| C(9)-C(10)-H(10)   | 122.2     |
| C(10)-C(11)-C(12)  | 129.9(16) |
| C(10)-C(11)-H(11)  | 115.0     |
| C(12)-C(11)-H(11)  | 115.0     |
| C(13)-C(12)-C(11)  | 109.6(12) |
| C(13)-C(12)-C(14)  | 131.3(14) |
| C(11)-C(12)-C(14)  | 119.1(13) |
| C(12)-C(13)-C(8)   | 129.9(15) |
| C(12)-C(13)-H(13)  | 115.0     |
| C(8)-C(13)-H(13)   | 115.0     |
| C(12)-C(14)-C(16)  | 114.6(12) |
| C(12)-C(14)-C(15)  | 109.4(12) |
| C(16)-C(14)-C(15)  | 107.1(9)  |
| C(12)-C(14)-C(17)  | 110.0(13) |
| C(16)-C(14)-C(17)  | 108.4(10) |
| C(15)-C(14)-C(17)  | 107.1(10) |
| C(14)-C(15)-H(15A) | 109.5     |
| C(14)-C(15)-H(15B) | 109.5     |

|                     |           |
|---------------------|-----------|
| H(15A)-C(15)-H(15B) | 109.5     |
| C(14)-C(15)-H(15C)  | 109.5     |
| H(15A)-C(15)-H(15C) | 109.5     |
| H(15B)-C(15)-H(15C) | 109.5     |
| C(14)-C(16)-H(16A)  | 109.5     |
| C(14)-C(16)-H(16B)  | 109.5     |
| H(16A)-C(16)-H(16B) | 109.5     |
| C(14)-C(16)-H(16C)  | 109.5     |
| H(16A)-C(16)-H(16C) | 109.5     |
| H(16B)-C(16)-H(16C) | 109.5     |
| C(14)-C(17)-H(17A)  | 109.5     |
| C(14)-C(17)-H(17B)  | 109.5     |
| H(17A)-C(17)-H(17B) | 109.5     |
| C(14)-C(17)-H(17C)  | 109.5     |
| H(17A)-C(17)-H(17C) | 109.5     |
| H(17B)-C(17)-H(17C) | 109.5     |
| O(13)-C(18)-O(14)   | 124.4(10) |
| O(13)-C(18)-C(19)   | 118.8(9)  |
| O(14)-C(18)-C(19)   | 116.4(11) |
| C(20)-C(19)-C(24)   | 120.0     |
| C(20)-C(19)-C(18)   | 119.2(8)  |
| C(24)-C(19)-C(18)   | 120.8(8)  |
| C(19)-C(20)-C(21)   | 120.0     |
| C(19)-C(20)-H(20)   | 120.0     |
| C(21)-C(20)-H(20)   | 120.0     |
| C(22)-C(21)-C(20)   | 120.0     |
| C(22)-C(21)-H(21)   | 120.0     |
| C(20)-C(21)-H(21)   | 120.0     |
| C(23)-C(22)-C(21)   | 120.0     |
| C(23)-C(22)-O(15)   | 117.9(8)  |
| C(21)-C(22)-O(15)   | 122.0(8)  |
| C(22)-C(23)-C(24)   | 120.0     |
| C(22)-C(23)-H(23)   | 120.0     |
| C(24)-C(23)-H(23)   | 120.0     |
| C(23)-C(24)-C(19)   | 120.0     |
| C(23)-C(24)-H(24)   | 120.0     |

|                     |           |
|---------------------|-----------|
| C(19)-C(24)-H(24)   | 120.0     |
| O(8)-C(35)-O(7)     | 125.6(9)  |
| O(8)-C(35)-C(36)    | 116.9(11) |
| O(7)-C(35)-C(36)    | 117.5(11) |
| C(41)-C(36)-C(37)   | 118.3(11) |
| C(41)-C(36)-C(35)   | 120.7(11) |
| C(37)-C(36)-C(35)   | 120.8(11) |
| C(36)-C(37)-C(38)   | 121.5(11) |
| C(36)-C(37)-H(37)   | 119.2     |
| C(38)-C(37)-H(37)   | 119.2     |
| C(39)-C(38)-C(37)   | 113.2(13) |
| C(39)-C(38)-H(38)   | 123.4     |
| C(37)-C(38)-H(38)   | 123.4     |
| C(40)-C(39)-C(38)   | 124.7(12) |
| C(40)-C(39)-O(9)    | 115.8(11) |
| C(38)-C(39)-O(9)    | 119.0(13) |
| C(39)-C(40)-C(41)   | 119.8(11) |
| C(39)-C(40)-H(40)   | 120.1     |
| C(41)-C(40)-H(40)   | 120.1     |
| C(36)-C(41)-C(40)   | 121.9(12) |
| C(36)-C(41)-H(41)   | 119.1     |
| C(40)-C(41)-H(41)   | 119.1     |
| C(43)-C(42)-C(47)   | 120.0     |
| C(43)-C(42)-H(42)   | 120.0     |
| C(47)-C(42)-H(42)   | 120.0     |
| O(9)-C(43)-C(42)    | 125.9(9)  |
| O(9)-C(43)-C(44)    | 112.4(10) |
| C(42)-C(43)-C(44)   | 120.0     |
| O(20)#2-C(44)-C(43) | 122.8(11) |
| O(20)#2-C(44)-C(45) | 117.1(11) |
| C(43)-C(44)-C(45)   | 120.0     |
| C(46)-C(45)-C(44)   | 120.0     |
| C(46)-C(45)-H(45)   | 120.0     |
| C(44)-C(45)-H(45)   | 120.0     |
| C(47)-C(46)-C(45)   | 120.0     |
| C(47)-C(46)-H(46)   | 120.0     |

|                     |           |
|---------------------|-----------|
| C(45)-C(46)-H(46)   | 120.0     |
| C(46)-C(47)-C(42)   | 120.0     |
| C(46)-C(47)-C(48)   | 116.5(9)  |
| C(42)-C(47)-C(48)   | 123.2(9)  |
| C(68)-C(67)-C(72)   | 120.0     |
| C(68)-C(67)-C(66)   | 122.0(8)  |
| C(72)-C(67)-C(66)   | 117.9(8)  |
| C(69)-C(68)-C(67)   | 120.0     |
| C(69)-C(68)-H(68)   | 120.0     |
| C(67)-C(68)-H(68)   | 120.0     |
| C(68)-C(69)-C(70)   | 120.0     |
| C(68)-C(69)-H(69)   | 120.0     |
| C(70)-C(69)-H(69)   | 120.0     |
| O(16)#3-C(70)-C(69) | 113.6(10) |
| O(16)#3-C(70)-C(71) | 126.4(10) |
| C(69)-C(70)-C(71)   | 120.0     |
| C(72)-C(71)-C(70)   | 120.0     |
| C(72)-C(71)-H(71)   | 120.0     |
| C(70)-C(71)-H(71)   | 120.0     |
| C(71)-C(72)-C(67)   | 120.0     |
| C(71)-C(72)-H(72)   | 120.0     |
| C(67)-C(72)-H(72)   | 120.0     |
| O(15)-C(25)-C(26)   | 120.8(16) |
| O(15)-C(25)-C(30)   | 119.2(16) |
| C(26)-C(25)-C(30)   | 120.0     |
| C(25)-C(26)-C(27)   | 120.0     |
| C(25)-C(26)-H(26)   | 120.0     |
| C(27)-C(26)-H(26)   | 120.0     |
| C(28)-C(27)-C(26)   | 120.0     |
| C(28)-C(27)-C(31)   | 113.8(15) |
| C(26)-C(27)-C(31)   | 125.9(14) |
| C(27)-C(28)-C(29)   | 120.0     |
| C(27)-C(28)-H(28)   | 120.0     |
| C(29)-C(28)-H(28)   | 120.0     |
| C(30)-C(29)-C(28)   | 120.0     |
| C(30)-C(29)-H(29)   | 120.0     |

|                     |           |
|---------------------|-----------|
| C(28)-C(29)-H(29)   | 120.0     |
| O(16)-C(30)-C(29)   | 117.3(17) |
| O(16)-C(30)-C(25)   | 121.7(16) |
| C(29)-C(30)-C(25)   | 120.0     |
| C(49)-C(48)-C(51)   | 113.3(12) |
| C(49)-C(48)-C(50)   | 113.7(10) |
| C(51)-C(48)-C(50)   | 113.5(11) |
| C(49)-C(48)-C(47)   | 108.7(14) |
| C(51)-C(48)-C(47)   | 101.7(15) |
| C(50)-C(48)-C(47)   | 104.7(12) |
| C(48)-C(49)-H(49A)  | 109.5     |
| C(48)-C(49)-H(49B)  | 109.5     |
| H(49A)-C(49)-H(49B) | 109.5     |
| C(48)-C(49)-H(49C)  | 109.5     |
| H(49A)-C(49)-H(49C) | 109.5     |
| H(49B)-C(49)-H(49C) | 109.5     |
| C(48)-C(50)-H(50A)  | 109.5     |
| C(48)-C(50)-H(50B)  | 109.5     |
| H(50A)-C(50)-H(50B) | 109.5     |
| C(48)-C(50)-H(50C)  | 109.5     |
| H(50A)-C(50)-H(50C) | 109.5     |
| H(50B)-C(50)-H(50C) | 109.5     |
| C(48)-C(51)-H(51A)  | 109.5     |
| C(48)-C(51)-H(51B)  | 109.5     |
| H(51A)-C(51)-H(51B) | 109.5     |
| C(48)-C(51)-H(51C)  | 109.5     |
| H(51A)-C(51)-H(51C) | 109.5     |
| H(51B)-C(51)-H(51C) | 109.5     |
| O(4)-C(52)-O(5)     | 125.9(10) |
| O(4)-C(52)-C(53)    | 120.1(9)  |
| O(5)-C(52)-C(53)    | 114.0(11) |
| C(58)-C(53)-C(54)   | 117.9(12) |
| C(58)-C(53)-C(52)   | 121.9(10) |
| C(54)-C(53)-C(52)   | 119.5(11) |
| C(55)-C(54)-C(53)   | 121.7(13) |
| C(55)-C(54)-H(54)   | 119.1     |

|                   |           |
|-------------------|-----------|
| C(53)-C(54)-H(54) | 119.1     |
| C(54)-C(55)-C(56) | 116.1(15) |
| C(54)-C(55)-H(55) | 121.9     |
| C(56)-C(55)-H(55) | 121.9     |
| O(20)-C(56)-C(55) | 109.0(17) |
| O(20)-C(56)-C(57) | 126.4(14) |
| C(55)-C(56)-C(57) | 124.2(15) |
| C(58)-C(57)-C(56) | 116.1(11) |
| C(58)-C(57)-H(57) | 121.9     |
| C(56)-C(57)-H(57) | 121.9     |
| C(57)-C(58)-C(53) | 122.8(12) |
| C(57)-C(58)-H(58) | 118.6     |
| C(53)-C(58)-H(58) | 118.6     |
| O(10)-C(59)-O(11) | 130.1(11) |
| O(10)-C(59)-C(60) | 112.9(11) |
| O(11)-C(59)-C(60) | 117.1(10) |
| C(61)-C(60)-C(65) | 118.4(10) |
| C(61)-C(60)-C(59) | 122.8(11) |
| C(65)-C(60)-C(59) | 118.9(10) |
| C(60)-C(61)-C(62) | 119.4(10) |
| C(60)-C(61)-H(61) | 120.3     |
| C(62)-C(61)-H(61) | 120.3     |
| C(63)-C(62)-C(61) | 118.3(10) |
| C(63)-C(62)-H(62) | 120.9     |
| C(61)-C(62)-H(62) | 120.9     |
| C(64)-C(63)-C(62) | 124.5(11) |
| C(64)-C(63)-O(12) | 114.6(12) |
| C(62)-C(63)-O(12) | 120.8(12) |
| C(63)-C(64)-C(65) | 120.0(11) |
| C(63)-C(64)-H(64) | 120.0     |
| C(65)-C(64)-H(64) | 120.0     |
| C(64)-C(65)-C(60) | 119.3(11) |
| C(64)-C(65)-H(65) | 120.3     |
| C(60)-C(65)-H(65) | 120.3     |
| O(6)-C(66)-O(21)  | 127.5(10) |
| O(6)-C(66)-C(67)  | 116.5(10) |

|                     |           |
|---------------------|-----------|
| O(21)-C(66)-C(67)   | 116.0(10) |
| N(2)-C(73)-O(18)    | 134.1(17) |
| N(2)-C(73)-H(73)    | 113.0     |
| O(18)-C(73)-H(73)   | 113.0     |
| N(2)-C(74)-H(74A)   | 109.5     |
| N(2)-C(74)-H(74B)   | 109.5     |
| H(74A)-C(74)-H(74B) | 109.5     |
| N(2)-C(74)-H(74C)   | 109.5     |
| H(74A)-C(74)-H(74C) | 109.5     |
| H(74B)-C(74)-H(74C) | 109.5     |
| N(2)-C(75)-H(75A)   | 109.5     |
| N(2)-C(75)-H(75B)   | 109.5     |
| H(75A)-C(75)-H(75B) | 109.5     |
| N(2)-C(75)-H(75C)   | 109.5     |
| H(75A)-C(75)-H(75C) | 109.5     |
| H(75B)-C(75)-H(75C) | 109.5     |
| O(17)-C(76)-N(1)    | 122.7(10) |
| O(17)-C(76)-H(76)   | 118.6     |
| N(1)-C(76)-H(76)    | 118.6     |
| N(1)-C(77)-H(77A)   | 109.5     |
| N(1)-C(77)-H(77B)   | 109.5     |
| H(77A)-C(77)-H(77B) | 109.5     |
| N(1)-C(77)-H(77C)   | 109.5     |
| H(77A)-C(77)-H(77C) | 109.5     |
| H(77B)-C(77)-H(77C) | 109.5     |
| N(1)-C(78)-H(78A)   | 109.5     |
| N(1)-C(78)-H(78B)   | 109.5     |
| H(78A)-C(78)-H(78B) | 109.5     |
| N(1)-C(78)-H(78C)   | 109.5     |
| H(78A)-C(78)-H(78C) | 109.5     |
| H(78B)-C(78)-H(78C) | 109.5     |
| C(76)-N(1)-C(78)    | 121.6(11) |
| C(76)-N(1)-C(77)    | 119.4(12) |
| C(78)-N(1)-C(77)    | 118.8(10) |
| C(73)-N(2)-C(75)    | 132.6(18) |
| C(73)-N(2)-C(74)    | 114.2(15) |



|                     |           |
|---------------------|-----------|
| C(75)-N(2)-C(74)    | 112.6(13) |
| C(1)-O(1)-Zn(2)     | 117.2(7)  |
| C(1)-O(2)-Zn(1)     | 130.5(7)  |
| C(5)-O(3)-C(8)      | 118.8(10) |
| C(52)-O(4)-Zn(1)    | 139.3(6)  |
| C(52)-O(5)-Zn(3)    | 123.6(7)  |
| C(66)-O(6)-Zn(1)    | 139.0(8)  |
| C(35)-O(7)-Zn(4)    | 126.2(7)  |
| C(35)-O(8)-Zn(3)    | 131.4(7)  |
| C(43)-O(9)-C(39)    | 120.3(9)  |
| C(59)-O(10)-Zn(4)   | 127.8(7)  |
| C(59)-O(11)-Zn(2)   | 126.9(7)  |
| C(9)#1-O(12)-C(63)  | 116.9(10) |
| C(18)-O(13)-Zn(3)   | 128.0(7)  |
| C(18)-O(14)-Zn(2)   | 133.9(8)  |
| C(25)-O(15)-C(22)   | 123.0(11) |
| C(30)-O(16)-C(70)#4 | 120(5)    |
| C(76)-O(17)-Zn(1)   | 120.3(7)  |
| C(73)-O(18)-Zn(1)   | 125.1(8)  |
| Zn(2)-O(19)-Zn(3)   | 110.8(3)  |
| Zn(2)-O(19)-Zn(4)   | 109.3(3)  |
| Zn(3)-O(19)-Zn(4)   | 108.2(3)  |
| Zn(2)-O(19)-Zn(1)   | 108.5(2)  |
| Zn(3)-O(19)-Zn(1)   | 110.1(3)  |
| Zn(4)-O(19)-Zn(1)   | 109.9(3)  |
| C(44)#2-O(20)-C(56) | 117(3)    |
| C(66)-O(21)-Zn(4)   | 118.8(6)  |
| O(19)-Zn(1)-O(4)    | 102.2(2)  |
| O(19)-Zn(1)-O(6)    | 95.8(3)   |
| O(4)-Zn(1)-O(6)     | 93.5(3)   |
| O(19)-Zn(1)-O(17)   | 170.0(3)  |
| O(4)-Zn(1)-O(17)    | 87.3(3)   |
| O(6)-Zn(1)-O(17)    | 86.5(3)   |
| O(19)-Zn(1)-O(18)   | 82.5(2)   |
| O(4)-Zn(1)-O(18)    | 174.9(3)  |
| O(6)-Zn(1)-O(18)    | 87.7(3)   |

|                   |            |
|-------------------|------------|
| O(17)-Zn(1)-O(18) | 87.8(3)    |
| O(19)-Zn(1)-O(2)  | 90.8(3)    |
| O(4)-Zn(1)-O(2)   | 89.4(3)    |
| O(6)-Zn(1)-O(2)   | 172.0(3)   |
| O(17)-Zn(1)-O(2)  | 86.2(3)    |
| O(18)-Zn(1)-O(2)  | 88.7(3)    |
| O(19)-Zn(2)-O(1)  | 122.5(3)   |
| O(19)-Zn(2)-O(11) | 113.3(3)   |
| O(1)-Zn(2)-O(11)  | 103.7(3)   |
| O(19)-Zn(2)-O(14) | 106.8(2)   |
| O(1)-Zn(2)-O(14)  | 104.0(3)   |
| O(11)-Zn(2)-O(14) | 104.9(3)   |
| O(19)-Zn(2)-Zn(4) | 35.97(17)  |
| O(1)-Zn(2)-Zn(4)  | 140.7(2)   |
| O(11)-Zn(2)-Zn(4) | 77.6(2)    |
| O(14)-Zn(2)-Zn(4) | 113.71(18) |
| O(19)-Zn(2)-Zn(3) | 35.03(16)  |
| O(1)-Zn(2)-Zn(3)  | 126.0(2)   |
| O(11)-Zn(2)-Zn(3) | 129.8(2)   |
| O(14)-Zn(2)-Zn(3) | 72.48(19)  |
| Zn(4)-Zn(2)-Zn(3) | 60.10(4)   |
| O(5)-Zn(3)-O(19)  | 118.6(2)   |
| O(5)-Zn(3)-O(8)   | 103.6(3)   |
| O(19)-Zn(3)-O(8)  | 111.7(3)   |
| O(5)-Zn(3)-O(13)  | 106.5(3)   |
| O(19)-Zn(3)-O(13) | 113.0(3)   |
| O(8)-Zn(3)-O(13)  | 101.6(3)   |
| O(5)-Zn(3)-Zn(4)  | 128.6(2)   |
| O(19)-Zn(3)-Zn(4) | 36.04(16)  |
| O(8)-Zn(3)-Zn(4)  | 75.7(2)    |
| O(13)-Zn(3)-Zn(4) | 124.2(2)   |
| O(5)-Zn(3)-Zn(2)  | 131.6(2)   |
| O(19)-Zn(3)-Zn(2) | 34.14(18)  |
| O(8)-Zn(3)-Zn(2)  | 122.7(2)   |
| O(13)-Zn(3)-Zn(2) | 78.9(2)    |
| Zn(4)-Zn(3)-Zn(2) | 59.65(4)   |

|                     |           |
|---------------------|-----------|
| O(21)-Zn(4)-O(19)   | 119.0(3)  |
| O(21)-Zn(4)-O(7)    | 106.0(3)  |
| O(19)-Zn(4)-O(7)    | 111.8(3)  |
| O(21)-Zn(4)-O(10)   | 109.6(3)  |
| O(19)-Zn(4)-O(10)   | 111.9(3)  |
| O(7)-Zn(4)-O(10)    | 96.0(3)   |
| O(21)-Zn(4)-Zn(2)   | 136.9(2)  |
| O(19)-Zn(4)-Zn(2)   | 34.77(17) |
| O(7)-Zn(4)-Zn(2)    | 115.8(2)  |
| O(10)-Zn(4)-Zn(2)   | 77.1(2)   |
| O(21)-Zn(4)-Zn(3)   | 123.1(2)  |
| O(19)-Zn(4)-Zn(3)   | 35.76(15) |
| O(7)-Zn(4)-Zn(3)    | 77.4(2)   |
| O(10)-Zn(4)-Zn(3)   | 126.7(2)  |
| Zn(2)-Zn(4)-Zn(3)   | 60.26(4)  |
| C(27)-C(31)-C(33)   | 117.7(18) |
| C(27)-C(31)-C(32)   | 100.1(17) |
| C(33)-C(31)-C(32)   | 105.0(15) |
| C(27)-C(31)-C(34)   | 122(3)    |
| C(33)-C(31)-C(34)   | 105.5(15) |
| C(32)-C(31)-C(34)   | 104.9(16) |
| C(31)-C(32)-H(32A)  | 109.5     |
| C(31)-C(32)-H(32B)  | 109.5     |
| H(32A)-C(32)-H(32B) | 109.5     |
| C(31)-C(32)-H(32C)  | 109.5     |
| H(32A)-C(32)-H(32C) | 109.5     |
| H(32B)-C(32)-H(32C) | 109.5     |
| C(31)-C(33)-H(33A)  | 109.5     |
| C(31)-C(33)-H(33B)  | 109.5     |
| H(33A)-C(33)-H(33B) | 109.5     |
| C(31)-C(33)-H(33C)  | 109.5     |
| H(33A)-C(33)-H(33C) | 109.5     |
| H(33B)-C(33)-H(33C) | 109.5     |
| C(31)-C(34)-H(34A)  | 109.5     |
| C(31)-C(34)-H(34B)  | 109.5     |
| H(34A)-C(34)-H(34B) | 109.5     |

|                     |       |
|---------------------|-------|
| C(31)-C(34)-H(34C)  | 109.5 |
| H(34A)-C(34)-H(34C) | 109.5 |
| H(34B)-C(34)-H(34C) | 109.5 |

---

Symmetry transformations used to generate equivalent atoms:

#1  $-x, -y+1, -z+1$  #2  $-x, -y+1, -z$  #3  $-x, y+1/2, -z+1/2$

#4  $-x, y-1/2, -z+1/2$

**Table S7.** Anisotropic displacement parameters ( $\text{\AA}^2 \times 10^3$ ) for compound **1D**G. The anisotropic displacement factor exponent takes the form:  $-2\pi^2 [ h^2 a^* 2U^{11} + \dots + 2 h k a^* b^* U^{12} ]$

|       | $U^{11}$ | $U^{22}$ | $U^{33}$ | $U^{23}$ | $U^{13}$ | $U^{12}$ |
|-------|----------|----------|----------|----------|----------|----------|
| C(1)  | 64(8)    | 68(8)    | 53(7)    | -21(6)   | 17(8)    | -16(6)   |
| C(2)  | 65(7)    | 66(7)    | 39(6)    | -9(5)    | 9(7)     | -16(5)   |
| C(3)  | 76(8)    | 81(8)    | 57(7)    | -2(6)    | 18(7)    | -26(6)   |
| C(4)  | 96(10)   | 113(10)  | 50(7)    | 9(7)     | 15(8)    | -34(7)   |
| C(5)  | 72(9)    | 69(8)    | 98(11)   | -11(7)   | 33(10)   | -26(6)   |
| C(6)  | 144(13)  | 109(10)  | 50(7)    | 6(7)     | 20(10)   | -4(9)    |
| C(7)  | 70(8)    | 94(9)    | 57(7)    | 3(6)     | 18(7)    | -18(6)   |
| C(8)  | 99(9)    | 112(9)   | 67(7)    | -24(7)   | 5(7)     | -75(7)   |
| C(9)  | 89(11)   | 150(14)  | 64(8)    | -49(9)   | 31(9)    | -60(11)  |
| C(10) | 68(9)    | 180(15)  | 52(7)    | -33(8)   | -12(8)   | -28(9)   |
| C(11) | 156(15)  | 148(15)  | 90(10)   | -33(11)  | 59(11)   | -56(12)  |
| C(12) | 88(8)    | 124(8)   | 71(7)    | -18(7)   | 11(8)    | -67(8)   |
| C(13) | 125(8)   | 143(8)   | 78(6)    | -25(6)   | 13(8)    | -56(7)   |
| C(14) | 190(17)  | 260(20)  | 119(13)  | -52(14)  | 25(13)   | -179(16) |
| C(15) | 230(20)  | 320(30)  | 200(20)  | -20(18)  | 20(20)   | -200(20) |
| C(16) | 270(20)  | 380(30)  | 250(20)  | -20(20)  | 180(20)  | -190(20) |
| C(17) | 630(60)  | 140(20)  | 490(50)  | -90(20)  | 290(50)  | -190(20) |
| C(18) | 96(8)    | 86(7)    | 61(6)    | -24(6)   | 11(7)    | 24(6)    |
| C(19) | 174(6)   | 116(6)   | 109(5)   | -36(5)   | 1(6)     | 65(5)    |
| C(20) | 195(7)   | 131(6)   | 120(5)   | -36(5)   | -9(6)    | 79(5)    |
| C(21) | 207(7)   | 140(6)   | 129(6)   | -33(5)   | -15(6)   | 85(5)    |
| C(22) | 275(11)  | 168(9)   | 134(8)   | -22(8)   | -12(9)   | 161(8)   |
| C(23) | 81(8)    | 56(8)    | 92(9)    | -15(6)   | -16(7)   | -16(6)   |
| C(24) | 97(7)    | 59(7)    | 97(7)    | -22(6)   | 32(7)    | 5(6)     |
| C(35) | 46(7)    | 140(12)  | 47(7)    | 10(7)    | 29(7)    | 9(7)     |
| C(36) | 65(8)    | 134(11)  | 59(8)    | -17(7)   | 12(8)    | -23(7)   |
| C(37) | 102(11)  | 206(15)  | 84(10)   | -47(10)  | 33(10)   | -63(10)  |
| C(38) | 143(15)  | 280(20)  | 69(9)    | -48(11)  | 42(12)   | -90(13)  |
| C(39) | 95(11)   | 267(18)  | 57(8)    | -36(10)  | 55(10)   | -80(11)  |

|       |         |         |         |          |          |         |
|-------|---------|---------|---------|----------|----------|---------|
| C(40) | 83(10)  | 182(14) | 63(8)   | -35(8)   | 20(9)    | -25(9)  |
| C(41) | 74(9)   | 159(12) | 53(7)   | -41(7)   | 18(8)    | -15(8)  |
| C(42) | 111(12) | 156(14) | 167(15) | 29(11)   | 79(13)   | 9(10)   |
| C(43) | 45(8)   | 203(17) | 109(12) | -70(12)  | 36(9)    | -44(10) |
| C(44) | 78(9)   | 196(13) | 80(8)   | -32(9)   | -12(8)   | -41(8)  |
| C(45) | 110(9)  | 233(12) | 100(7)  | 20(8)    | 9(9)     | -22(8)  |
| C(46) | 98(9)   | 239(13) | 103(8)  | 29(9)    | 25(9)    | -10(10) |
| C(47) | 57(8)   | 159(12) | 34(6)   | 3(7)     | 7(7)     | 15(8)   |
| C(67) | 75(9)   | 65(9)   | 119(10) | -44(7)   | -2(9)    | -5(7)   |
| C(68) | 87(10)  | 81(11)  | 197(16) | -5(10)   | -39(11)  | 12(9)   |
| C(69) | 132(15) | 69(12)  | 330(30) | 7(12)    | -78(16)  | -9(10)  |
| C(70) | 102(13) | 63(12)  | 420(30) | -17(14)  | -92(17)  | 29(10)  |
| C(71) | 77(10)  | 74(10)  | 380(20) | -22(13)  | -94(13)  | -19(9)  |
| C(72) | 61(9)   | 64(10)  | 257(19) | -30(9)   | -28(11)  | 0(7)    |
| C(25) | 265(12) | 157(11) | 144(11) | 9(9)     | -5(10)   | 155(9)  |
| C(26) | 200(15) | 92(13)  | 320(30) | 60(14)   | 47(14)   | 76(12)  |
| C(27) | 90(11)  | 64(11)  | 400(30) | 35(13)   | -102(14) | -18(8)  |
| C(28) | 122(11) | 110(10) | 420(20) | 41(11)   | -94(13)  | -6(9)   |
| C(29) | 116(10) | 113(10) | 430(20) | 44(10)   | -122(11) | 11(8)   |
| C(30) | 127(11) | 108(11) | 430(20) | 38(10)   | -145(12) | 29(8)   |
| C(48) | 170(18) | 280(20) | 330(20) | -170(20) | 200(20)  | -91(16) |
| C(49) | 239(14) | 277(14) | 273(14) | -40(9)   | 34(10)   | -16(9)  |
| C(50) | 63(11)  | 630(40) | 160(17) | -10(20)  | 57(15)   | -8(17)  |
| C(51) | 370(20) | 380(20) | 380(20) | 12(10)   | 64(11)   | 14(10)  |
| C(52) | 34(6)   | 78(8)   | 89(9)   | -13(7)   | -10(7)   | -9(6)   |
| C(53) | 74(9)   | 121(10) | 100(10) | -83(8)   | -5(9)    | 5(7)    |
| C(54) | 83(10)  | 183(15) | 110(11) | -67(11)  | -11(11)  | 14(9)   |
| C(55) | 96(13)  | 221(18) | 166(17) | -112(14) | -28(13)  | 14(12)  |
| C(56) | 73(10)  | 165(13) | 164(14) | -81(11)  | -58(11)  | 23(9)   |
| C(57) | 44(8)   | 222(17) | 105(11) | -39(11)  | -25(10)  | 5(9)    |
| C(58) | 40(7)   | 141(11) | 83(9)   | -22(8)   | -25(8)   | 6(7)    |
| C(59) | 33(6)   | 102(10) | 47(7)   | -16(7)   | 5(6)     | 11(6)   |
| C(60) | 47(7)   | 94(9)   | 58(7)   | -33(6)   | 0(7)     | -5(6)   |
| C(61) | 64(7)   | 107(9)  | 59(7)   | -22(7)   | 12(7)    | -45(7)  |
| C(62) | 58(8)   | 113(10) | 71(8)   | -21(8)   | 9(8)     | -40(7)  |
| C(63) | 50(8)   | 99(10)  | 59(8)   | -43(8)   | -22(7)   | -6(7)   |

|       |         |         |         |          |          |        |
|-------|---------|---------|---------|----------|----------|--------|
| C(64) | 73(9)   | 116(10) | 41(6)   | -37(7)   | -3(7)    | -14(7) |
| C(65) | 60(7)   | 98(9)   | 47(7)   | -27(6)   | -16(7)   | -1(6)  |
| C(66) | 54(8)   | 54(8)   | 57(7)   | 0(6)     | 3(7)     | 16(6)  |
| C(73) | 115(12) | 124(12) | 80(9)   | -62(9)   | 21(10)   | -34(9) |
| C(74) | 360(40) | 320(30) | 136(18) | -122(19) | 50(20)   | 10(30) |
| C(75) | 260(20) | 192(17) | 218(19) | -77(14)  | 170(20)  | 7(15)  |
| C(76) | 50(7)   | 115(10) | 86(9)   | -30(7)   | 8(8)     | 6(7)   |
| C(77) | 43(7)   | 201(16) | 219(19) | 56(13)   | -25(10)  | -58(9) |
| C(78) | 77(10)  | 236(18) | 150(14) | -61(13)  | 49(11)   | 28(10) |
| N(1)  | 43(6)   | 142(9)  | 108(9)  | -4(7)    | 4(7)     | 4(6)   |
| N(2)  | 163(14) | 143(11) | 90(9)   | -26(9)   | 32(11)   | 20(9)  |
| O(1)  | 45(4)   | 101(5)  | 55(5)   | 1(4)     | -3(4)    | -8(4)  |
| O(2)  | 68(5)   | 90(6)   | 76(5)   | -16(4)   | 26(5)    | -28(4) |
| O(3)  | 99(7)   | 115(7)  | 86(6)   | 1(5)     | 26(6)    | -20(5) |
| O(4)  | 45(4)   | 100(6)  | 58(4)   | -23(4)   | -7(4)    | -3(4)  |
| O(5)  | 47(5)   | 134(7)  | 77(5)   | -48(4)   | -19(5)   | 23(4)  |
| O(6)  | 75(5)   | 65(5)   | 113(7)  | 7(5)     | -16(5)   | -5(4)  |
| O(7)  | 64(5)   | 132(6)  | 46(4)   | -26(4)   | 15(4)    | -8(4)  |
| O(8)  | 63(5)   | 104(6)  | 66(5)   | -22(4)   | 9(5)     | -24(4) |
| O(9)  | 166(10) | 214(11) | 114(8)  | -54(7)   | 68(9)    | -60(8) |
| O(10) | 45(4)   | 93(5)   | 50(4)   | -8(4)    | -4(4)    | -16(4) |
| O(11) | 61(5)   | 84(6)   | 61(5)   | -20(4)   | 1(4)     | -22(4) |
| O(12) | 69(5)   | 113(7)  | 73(5)   | -29(5)   | -20(5)   | -20(5) |
| O(13) | 122(7)  | 98(6)   | 49(4)   | -24(4)   | -24(5)   | 50(5)  |
| O(14) | 55(4)   | 76(5)   | 70(5)   | -28(4)   | 11(4)    | -1(3)  |
| O(15) | 292(10) | 189(9)  | 157(8)  | -26(7)   | -13(8)   | 173(7) |
| O(16) | 204(14) | 87(9)   | 780(40) | -23(14)  | -320(20) | 7(9)   |
| O(17) | 42(4)   | 95(6)   | 107(6)  | -34(5)   | 13(5)    | -8(4)  |
| O(18) | 72(5)   | 104(6)  | 84(5)   | -43(4)   | 26(5)    | -3(4)  |
| O(19) | 33(3)   | 78(4)   | 53(4)   | -20(3)   | 4(4)     | 0(3)   |
| O(20) | 89(8)   | 317(15) | 165(10) | -161(10) | -78(8)   | 60(8)  |
| O(21) | 56(5)   | 74(5)   | 91(6)   | -13(4)   | -13(5)   | -2(4)  |
| Zn(1) | 35(1)   | 73(1)   | 67(1)   | -15(1)   | 4(1)     | -4(1)  |
| Zn(2) | 39(1)   | 74(1)   | 51(1)   | -18(1)   | 3(1)     | -5(1)  |
| Zn(3) | 42(1)   | 82(1)   | 53(1)   | -19(1)   | -3(1)    | 0(1)   |
| Zn(4) | 41(1)   | 75(1)   | 57(1)   | -16(1)   | 0(1)     | -7(1)  |

|       |         |         |         |          |          |          |
|-------|---------|---------|---------|----------|----------|----------|
| C(31) | 190(20) | 180(20) | 480(40) | -80(30)  | -120(20) | -24(18)  |
| C(32) | 288(17) | 301(17) | 323(17) | -9(10)   | 29(10)   | 5(10)    |
| C(33) | 200(20) | 89(14)  | 700(60) | 0(20)    | -180(30) | -4(14)   |
| C(34) | 540(70) | 710(80) | 740(80) | 450(70)  | -400(70) | -400(60) |
| O(1W) | 450(30) | 500(30) | 129(11) | 97(14)   | 120(16)  | 140(20)  |
| O(2W) | 320(20) | 450(30) | 350(20) | -122(19) | 150(20)  | -75(18)  |

---



**Table S8.** Atomic coordinates ( $\times 10^4$ ) and equivalent isotropic displacement parameters ( $\text{\AA}^2 \times 10^3$ ) for Compound **1**.  $U(\text{eq})$  is defined as one third of the trace of the orthogonalized  $U_{ij}$  tensor.

|       | x         | y        | z        | $U(\text{eq})$ |
|-------|-----------|----------|----------|----------------|
| C(1)  | 8038(13)  | 6106(6)  | 7785(8)  | 67(5)          |
| C(2)  | 7308(13)  | 6497(7)  | 8024(7)  | 74(5)          |
| C(3)  | 7760(11)  | 6907(6)  | 8333(7)  | 65(5)          |
| C(4)  | 7100(10)  | 7256(6)  | 8553(7)  | 66(5)          |
| C(5)  | 6020(14)  | 7183(5)  | 8459(7)  | 62(4)          |
| C(6)  | 5510(13)  | 6777(6)  | 8154(7)  | 70(4)          |
| C(7)  | 6145(13)  | 6414(6)  | 7904(7)  | 76(5)          |
| C(8)  | 4280(13)  | 7610(5)  | 8495(8)  | 54(4)          |
| C(9)  | 3959(11)  | 7733(6)  | 7947(8)  | 62(4)          |
| C(10) | 2857(12)  | 7806(5)  | 7747(8)  | 73(5)          |
| C(11) | 2074(10)  | 7729(5)  | 8143(8)  | 56(4)          |
| C(12) | 2443(14)  | 7600(6)  | 8714(9)  | 88(6)          |
| C(13) | 3500(14)  | 7523(6)  | 8912(7)  | 73(5)          |
| C(14) | 879(11)   | 7804(6)  | 7929(7)  | 64(4)          |
| C(15) | 418(13)   | 7384(7)  | 7527(10) | 131(8)         |
| C(16) | 186(13)   | 7863(10) | 8405(10) | 169(12)        |
| C(17) | 692(13)   | 8293(9)  | 7574(15) | 226(17)        |
| C(18) | 5549(12)  | 8110(6)  | 7553(7)  | 56(4)          |
| C(19) | 6348(11)  | 8018(5)  | 7149(7)  | 62(4)          |
| C(20) | 7198(10)  | 8351(5)  | 7137(7)  | 58(4)          |
| C(21) | 7311(10)  | 8751(5)  | 7547(7)  | 53(4)          |
| C(22) | 6568(11)  | 8812(6)  | 7971(7)  | 66(4)          |
| C(23) | 5660(12)  | 8502(6)  | 7948(6)  | 59(4)          |
| C(24) | 14612(14) | 6492(7)  | 6431(8)  | 80(5)          |
| C(25) | 13729(16) | 6827(7)  | 6578(9)  | 105(6)         |
| C(26) | 12776(15) | 6573(8)  | 6665(8)  | 105(6)         |
| C(27) | 12599(14) | 6046(7)  | 6566(7)  | 72(5)          |

|       |           |          |           |         |
|-------|-----------|----------|-----------|---------|
| C(28) | 13409(12) | 5751(7)  | 6360(8)   | 88(6)   |
| C(29) | 14423(14) | 5978(7)  | 6320(7)   | 87(5)   |
| C(30) | 11534(11) | 5787(8)  | 6644(7)   | 68(5)   |
| C(31) | 8235(15)  | 4659(6)  | 6177(6)   | 62(4)   |
| C(32) | 7495(13)  | 4324(6)  | 5788(7)   | 63(4)   |
| C(33) | 6335(15)  | 4505(7)  | 5650(7)   | 82(5)   |
| C(34) | 5578(17)  | 4211(9)  | 5337(9)   | 124(8)  |
| C(35) | 5835(16)  | 3724(9)  | 5119(7)   | 82(6)   |
| C(36) | 6953(19)  | 3560(6)  | 5211(7)   | 85(6)   |
| C(37) | 7748(15)  | 3876(7)  | 5546(7)   | 82(5)   |
| C(38) | 4100(20)  | 3502(9)  | 4636(11)  | 130(9)  |
| C(39) | 3312(17)  | 3656(10) | 5022(10)  | 158(10) |
| C(40) | 2223(18)  | 3756(10) | 4705(12)  | 142(6)  |
| C(41) | 1874(19)  | 3723(9)  | 4094(12)  | 147(6)  |
| C(42) | 2717(17)  | 3520(9)  | 3826(11)  | 147(6)  |
| C(43) | 3806(13)  | 3441(7)  | 4047(11)  | 98(6)   |
| C(45) | 1897(17)  | 4556(7)  | 5385(10)  | 149(8)  |
| C(46) | 322(17)   | 4120(11) | 4681(12)  | 213(15) |
| C(47) | 1193(17)  | 3670(7)  | 5609(9)   | 142(9)  |
| C(48) | 11716(11) | 4110(6)  | 7416(11)  | 65(5)   |
| C(49) | 8127(15)  | 4322(6)  | 8270(8)   | 73(5)   |
| C(50) | 7397(13)  | 4028(7)  | 8598(9)   | 83(5)   |
| C(51) | 12136(14) | 6237(7)  | 10886(11) | 116(7)  |
| C(52) | 12744(17) | 6522(7)  | 10533(10) | 119(8)  |
| C(53) | 13840(20) | 6541(7)  | 10745(11) | 101(7)  |
| C(54) | 14345(16) | 6288(8)  | 11247(9)  | 100(7)  |
| C(55) | 13662(15) | 6025(6)  | 11564(7)  | 83(5)   |
| C(56) | 15472(16) | 6802(8)  | 10376(8)  | 91(6)   |
| C(57) | 16200(20) | 7221(9)  | 10387(9)  | 148(11) |
| C(58) | 17133(17) | 7258(11) | 10370(11) | 147(9)  |
| C(59) | 17743(15) | 6810(9)  | 10276(9)  | 111(6)  |
| C(60) | 17109(13) | 6331(8)  | 10222(8)  | 115(5)  |
| C(61) | 16035(13) | 6378(10) | 10299(9)  | 103(5)  |
| C(62) | 18960(16) | 6824(7)  | 10285(8)  | 139(8)  |
| C(63) | 19362(17) | 7324(8)  | 10019(12) | 188(12) |
| C(64) | 19489(15) | 6836(10) | 10954(8)  | 163(11) |

|       |           |          |          |         |
|-------|-----------|----------|----------|---------|
| C(65) | 19347(17) | 6368(10) | 9920(10) | 191(14) |
| C(66) | 14495(15) | 5791(8)  | 9847(10) | 83(5)   |
| C(67) | 13862(15) | 5388(6)  | 9970(8)  | 79(5)   |
| C(68) | 12943(14) | 5303(6)  | 9590(9)  | 81(5)   |
| C(69) | 12671(16) | 5613(7)  | 9078(9)  | 85(5)   |
| C(70) | 13368(15) | 5992(7)  | 8956(8)  | 86(5)   |
| C(71) | 14282(15) | 6089(7)  | 9340(10) | 92(6)   |
| C(72) | 11689(16) | 5515(9)  | 8639(11) | 94(7)   |
| O(1)  | 9019(8)   | 6197(4)  | 7823(5)  | 84(3)   |
| O(2)  | 7558(8)   | 5712(4)  | 7541(5)  | 83(3)   |
| O(3)  | 5368(9)   | 7545(4)  | 8718(4)  | 80(3)   |
| O(4)  | 4657(8)   | 7780(3)  | 7493(4)  | 68(3)   |
| O(5)  | 11281(7)  | 4136(3)  | 7923(5)  | 62(3)   |
| O(6)  | 11519(8)  | 4342(4)  | 6949(5)  | 75(3)   |
| O(7)  | 9261(9)   | 4538(4)  | 6182(5)  | 77(3)   |
| O(8)  | 7851(8)   | 4983(4)  | 6471(5)  | 80(3)   |
| O(9)  | 5178(11)  | 3377(5)  | 4819(6)  | 103(4)  |
| O(10) | 15525(9)  | 6754(4)  | 6352(5)  | 99(4)   |
| O(11) | 11403(8)  | 5349(4)  | 6470(5)  | 84(4)   |
| O(12) | 10894(8)  | 6060(4)  | 6938(5)  | 87(3)   |
| O(13) | 11190(8)  | 5076(4)  | 8729(5)  | 87(3)   |
| O(14) | 11375(11) | 5819(5)  | 8232(8)  | 118(5)  |
| O(15) | 15478(10) | 5873(4)  | 10254(5) | 95(4)   |
| O(16) | 14397(11) | 6835(4)  | 10350(6) | 98(4)   |
| O(17) | 7637(8)   | 4544(4)  | 7779(5)  | 76(3)   |
| O(18) | 9118(8)   | 4372(4)  | 8463(5)  | 81(3)   |
| O(19) | 9772(7)   | 5104(3)  | 7450(5)  | 75(3)   |
| Zn(1) | 10220(1)  | 5797(1)  | 7619(1)  | 71(1)   |
| Zn(2) | 8228(1)   | 5091(1)  | 7317(1)  | 66(1)   |
| Zn(3) | 10400(1)  | 4857(1)  | 6732(1)  | 68(1)   |
| Zn(4) | 10326(1)  | 4672(1)  | 8133(1)  | 70(1)   |
| C(44) | 1387(17)  | 4059(7)  | 5108(8)  | 148(9)  |

---

Table S9. Bond lengths [ $\text{\AA}$ ] and angles [ $^\circ$ ] for Compound 1.

---

|              |           |
|--------------|-----------|
| C(1)-O(1)    | 1.225(15) |
| C(1)-O(2)    | 1.283(17) |
| C(1)-C(2)    | 1.50(2)   |
| C(2)-C(3)    | 1.363(19) |
| C(2)-C(7)    | 1.44(2)   |
| C(3)-C(4)    | 1.354(18) |
| C(3)-H(3)    | 0.9300    |
| C(4)-C(5)    | 1.335(18) |
| C(4)-H(4)    | 0.9300    |
| C(5)-C(6)    | 1.379(18) |
| C(5)-O(3)    | 1.411(16) |
| C(6)-C(7)    | 1.390(19) |
| C(6)-H(6)    | 0.9300    |
| C(7)-H(7)    | 0.9300    |
| C(8)-C(9)    | 1.274(18) |
| C(8)-O(3)    | 1.383(16) |
| C(8)-C(13)   | 1.424(19) |
| C(9)-C(10)   | 1.391(18) |
| C(9)-O(4)    | 1.398(16) |
| C(10)-C(11)  | 1.389(18) |
| C(10)-H(10)  | 0.9300    |
| C(11)-C(12)  | 1.337(19) |
| C(11)-C(14)  | 1.506(18) |
| C(12)-C(13)  | 1.340(19) |
| C(12)-H(12)  | 0.9300    |
| C(13)-H(13)  | 0.9300    |
| C(14)-C(16)  | 1.44(2)   |
| C(14)-C(15)  | 1.49(2)   |
| C(14)-C(17)  | 1.51(2)   |
| C(15)-H(15A) | 0.9600    |
| C(15)-H(15B) | 0.9600    |
| C(15)-H(15C) | 0.9600    |
| C(16)-H(16A) | 0.9600    |
| C(16)-H(16B) | 0.9600    |

|               |           |
|---------------|-----------|
| C(16)-H(16C)  | 0.9600    |
| C(17)-H(17A)  | 0.9600    |
| C(17)-H(17B)  | 0.9600    |
| C(17)-H(17C)  | 0.9600    |
| C(18)-C(23)   | 1.352(18) |
| C(18)-O(4)    | 1.394(15) |
| C(18)-C(19)   | 1.424(19) |
| C(19)-C(20)   | 1.368(17) |
| C(19)-H(19)   | 0.9300    |
| C(20)-C(21)   | 1.389(18) |
| C(20)-H(20)   | 0.9300    |
| C(21)-C(22)   | 1.391(18) |
| C(21)-C(48)#1 | 1.521(19) |
| C(22)-C(23)   | 1.381(18) |
| C(22)-H(22)   | 0.9300    |
| C(23)-H(23)   | 0.9300    |
| C(24)-O(10)   | 1.347(16) |
| C(24)-C(29)   | 1.39(2)   |
| C(24)-C(25)   | 1.47(2)   |
| C(25)-C(26)   | 1.38(2)   |
| C(25)-H(25)   | 0.9300    |
| C(26)-C(27)   | 1.42(2)   |
| C(26)-H(26)   | 0.9300    |
| C(27)-C(28)   | 1.38(2)   |
| C(27)-C(30)   | 1.50(2)   |
| C(28)-C(29)   | 1.395(19) |
| C(28)-H(28)   | 0.9300    |
| C(29)-H(29)   | 0.9300    |
| C(30)-O(11)   | 1.222(18) |
| C(30)-O(12)   | 1.296(17) |
| C(31)-O(8)    | 1.204(17) |
| C(31)-O(7)    | 1.302(18) |
| C(31)-C(32)   | 1.473(19) |
| C(32)-C(37)   | 1.348(19) |
| C(32)-C(33)   | 1.50(2)   |
| C(33)-C(34)   | 1.34(2)   |

|               |           |
|---------------|-----------|
| C(33)-H(33)   | 0.9300    |
| C(34)-C(35)   | 1.42(2)   |
| C(34)-H(34)   | 0.9300    |
| C(35)-O(9)    | 1.347(19) |
| C(35)-C(36)   | 1.43(2)   |
| C(36)-C(37)   | 1.43(2)   |
| C(36)-H(36)   | 0.9300    |
| C(37)-H(37)   | 0.9300    |
| C(38)-C(43)   | 1.32(2)   |
| C(38)-O(9)    | 1.39(3)   |
| C(38)-C(39)   | 1.42(3)   |
| C(39)-C(40)   | 1.46(3)   |
| C(39)-H(39)   | 0.9300    |
| C(40)-C(41)   | 1.37(3)   |
| C(40)-C(44)   | 1.64(3)   |
| C(41)-C(42)   | 1.36(3)   |
| C(41)-H(41)   | 0.9300    |
| C(42)-C(43)   | 1.39(2)   |
| C(42)-H(42)   | 0.9300    |
| C(43)-O(10)#2 | 1.374(19) |
| C(45)-C(44)   | 1.551(10) |
| C(45)-H(45A)  | 0.9600    |
| C(45)-H(45B)  | 0.9600    |
| C(45)-H(45C)  | 0.9600    |
| C(46)-C(44)   | 1.534(10) |
| C(46)-H(46A)  | 0.9600    |
| C(46)-H(46B)  | 0.9600    |
| C(46)-H(46C)  | 0.9600    |
| C(47)-C(44)   | 1.547(10) |
| C(47)-H(47A)  | 0.9600    |
| C(47)-H(47B)  | 0.9600    |
| C(47)-H(47C)  | 0.9600    |
| C(48)-O(6)    | 1.20(2)   |
| C(48)-O(5)    | 1.30(2)   |
| C(48)-C(21)#3 | 1.521(19) |
| C(49)-O(18)   | 1.252(17) |

|               |           |
|---------------|-----------|
| C(49)-O(17)   | 1.318(16) |
| C(49)-C(50)   | 1.44(2)   |
| C(50)-C(55)#4 | 1.319(19) |
| C(50)-C(51)#4 | 1.40(2)   |
| C(51)-C(52)   | 1.37(2)   |
| C(51)-C(50)#4 | 1.40(2)   |
| C(51)-H(51)   | 0.9300    |
| C(52)-C(53)   | 1.38(3)   |
| C(52)-H(52)   | 0.9300    |
| C(53)-C(54)   | 1.38(3)   |
| C(53)-O(16)   | 1.405(19) |
| C(54)-C(55)   | 1.35(2)   |
| C(54)-H(54)   | 0.9300    |
| C(55)-C(50)#4 | 1.319(19) |
| C(55)-H(55)   | 0.9300    |
| C(56)-O(16)   | 1.322(19) |
| C(56)-C(61)   | 1.34(2)   |
| C(56)-C(57)   | 1.42(2)   |
| C(57)-C(58)   | 1.15(2)   |
| C(57)-H(57)   | 0.9300    |
| C(58)-C(59)   | 1.43(3)   |
| C(58)-H(58)   | 0.9300    |
| C(59)-C(60)   | 1.48(3)   |
| C(59)-C(62)   | 1.50(2)   |
| C(60)-C(61)   | 1.36(2)   |
| C(60)-H(60)   | 0.9300    |
| C(61)-O(15)   | 1.50(2)   |
| C(62)-C(63)   | 1.547(10) |
| C(62)-C(64)   | 1.548(10) |
| C(62)-C(65)   | 1.554(10) |
| C(63)-H(63A)  | 0.9600    |
| C(63)-H(63B)  | 0.9600    |
| C(63)-H(63C)  | 0.9600    |
| C(64)-H(64A)  | 0.9600    |
| C(64)-H(64B)  | 0.9600    |
| C(64)-H(64C)  | 0.9600    |

|               |           |
|---------------|-----------|
| C(65)-H(65A)  | 0.9600    |
| C(65)-H(65B)  | 0.9600    |
| C(65)-H(65C)  | 0.9600    |
| C(66)-C(67)   | 1.36(2)   |
| C(66)-C(71)   | 1.37(2)   |
| C(66)-O(15)   | 1.440(19) |
| C(67)-C(68)   | 1.35(2)   |
| C(67)-H(67)   | 0.9300    |
| C(68)-C(69)   | 1.41(2)   |
| C(68)-H(68)   | 0.9300    |
| C(69)-C(70)   | 1.37(2)   |
| C(69)-C(72)   | 1.48(2)   |
| C(70)-C(71)   | 1.35(2)   |
| C(70)-H(70)   | 0.9300    |
| C(71)-H(71)   | 0.9300    |
| C(72)-O(14)   | 1.23(2)   |
| C(72)-O(13)   | 1.34(2)   |
| O(1)-Zn(1)    | 1.910(10) |
| O(2)-Zn(2)    | 1.924(10) |
| O(5)-Zn(4)    | 1.928(9)  |
| O(6)-Zn(3)    | 1.954(12) |
| O(7)-Zn(3)    | 1.939(12) |
| O(8)-Zn(2)    | 1.899(12) |
| O(10)-C(43)#2 | 1.374(19) |
| O(11)-Zn(3)   | 1.925(11) |
| O(12)-Zn(1)   | 1.929(11) |
| O(13)-Zn(4)   | 1.919(12) |
| O(14)-Zn(1)   | 1.851(15) |
| O(17)-Zn(2)   | 1.957(10) |
| O(18)-Zn(4)   | 1.904(10) |
| O(19)-Zn(2)   | 1.889(9)  |
| O(19)-Zn(1)   | 1.933(9)  |
| O(19)-Zn(4)   | 1.952(10) |
| O(19)-Zn(3)   | 1.956(10) |
| Zn(1)-Zn(2)   | 3.090(3)  |
| Zn(3)-Zn(4)   | 3.149(3)  |



|                   |           |
|-------------------|-----------|
| O(1)-C(1)-O(2)    | 126.1(14) |
| O(1)-C(1)-C(2)    | 117.8(17) |
| O(2)-C(1)-C(2)    | 116.0(14) |
| C(3)-C(2)-C(7)    | 123.5(14) |
| C(3)-C(2)-C(1)    | 119.6(16) |
| C(7)-C(2)-C(1)    | 116.9(16) |
| C(4)-C(3)-C(2)    | 119.5(14) |
| C(4)-C(3)-H(3)    | 120.3     |
| C(2)-C(3)-H(3)    | 120.3     |
| C(5)-C(4)-C(3)    | 118.2(14) |
| C(5)-C(4)-H(4)    | 120.9     |
| C(3)-C(4)-H(4)    | 120.9     |
| C(4)-C(5)-C(6)    | 125.3(14) |
| C(4)-C(5)-O(3)    | 116.2(14) |
| C(6)-C(5)-O(3)    | 118.4(14) |
| C(5)-C(6)-C(7)    | 118.9(15) |
| C(5)-C(6)-H(6)    | 120.5     |
| C(7)-C(6)-H(6)    | 120.5     |
| C(6)-C(7)-C(2)    | 114.5(15) |
| C(6)-C(7)-H(7)    | 122.8     |
| C(2)-C(7)-H(7)    | 122.8     |
| C(9)-C(8)-O(3)    | 123.7(15) |
| C(9)-C(8)-C(13)   | 119.9(15) |
| O(3)-C(8)-C(13)   | 116.4(15) |
| C(8)-C(9)-C(10)   | 121.5(15) |
| C(8)-C(9)-O(4)    | 123.8(14) |
| C(10)-C(9)-O(4)   | 114.6(15) |
| C(9)-C(10)-C(11)  | 120.0(17) |
| C(9)-C(10)-H(10)  | 120.0     |
| C(11)-C(10)-H(10) | 120.0     |
| C(12)-C(11)-C(10) | 116.6(15) |
| C(12)-C(11)-C(14) | 122.9(14) |
| C(10)-C(11)-C(14) | 120.4(16) |
| C(11)-C(12)-C(13) | 124.0(17) |
| C(11)-C(12)-H(12) | 118.0     |

|                     |           |
|---------------------|-----------|
| C(13)-C(12)-H(12)   | 118.0     |
| C(12)-C(13)-C(8)    | 117.7(15) |
| C(12)-C(13)-H(13)   | 121.1     |
| C(8)-C(13)-H(13)    | 121.1     |
| C(16)-C(14)-C(15)   | 107.4(15) |
| C(16)-C(14)-C(11)   | 115.2(15) |
| C(15)-C(14)-C(11)   | 112.3(12) |
| C(16)-C(14)-C(17)   | 102.8(17) |
| C(15)-C(14)-C(17)   | 107.3(19) |
| C(11)-C(14)-C(17)   | 111.1(13) |
| C(23)-C(18)-O(4)    | 123.9(15) |
| C(23)-C(18)-C(19)   | 120.7(14) |
| O(4)-C(18)-C(19)    | 115.3(14) |
| C(20)-C(19)-C(18)   | 119.2(14) |
| C(20)-C(19)-H(19)   | 120.4     |
| C(18)-C(19)-H(19)   | 120.4     |
| C(19)-C(20)-C(21)   | 119.7(14) |
| C(19)-C(20)-H(20)   | 120.2     |
| C(21)-C(20)-H(20)   | 120.2     |
| C(20)-C(21)-C(22)   | 120.2(13) |
| C(20)-C(21)-C(48)#1 | 121.9(15) |
| C(22)-C(21)-C(48)#1 | 117.7(15) |
| C(23)-C(22)-C(21)   | 119.9(15) |
| C(23)-C(22)-H(22)   | 120.0     |
| C(21)-C(22)-H(22)   | 120.0     |
| C(18)-C(23)-C(22)   | 119.9(15) |
| C(18)-C(23)-H(23)   | 120.1     |
| C(22)-C(23)-H(23)   | 120.1     |
| O(10)-C(24)-C(29)   | 127.0(17) |
| O(10)-C(24)-C(25)   | 111.7(16) |
| C(29)-C(24)-C(25)   | 120.8(15) |
| C(26)-C(25)-C(24)   | 113.7(16) |
| C(26)-C(25)-H(25)   | 123.2     |
| C(24)-C(25)-H(25)   | 123.2     |
| C(25)-C(26)-C(27)   | 124.8(17) |
| C(25)-C(26)-H(26)   | 117.6     |

|                   |           |
|-------------------|-----------|
| C(27)-C(26)-H(26) | 117.6     |
| C(28)-C(27)-C(26) | 119.8(16) |
| C(28)-C(27)-C(30) | 116.9(15) |
| C(26)-C(27)-C(30) | 123.2(16) |
| C(27)-C(28)-C(29) | 117.7(15) |
| C(27)-C(28)-H(28) | 121.2     |
| C(29)-C(28)-H(28) | 121.2     |
| C(28)-C(29)-C(24) | 122.6(16) |
| C(28)-C(29)-H(29) | 118.7     |
| C(24)-C(29)-H(29) | 118.7     |
| O(11)-C(30)-O(12) | 128.1(15) |
| O(11)-C(30)-C(27) | 118.6(15) |
| O(12)-C(30)-C(27) | 113.0(17) |
| O(8)-C(31)-O(7)   | 127.6(14) |
| O(8)-C(31)-C(32)  | 119.1(17) |
| O(7)-C(31)-C(32)  | 113.2(16) |
| C(37)-C(32)-C(31) | 127.0(17) |
| C(37)-C(32)-C(33) | 117.0(15) |
| C(31)-C(32)-C(33) | 116.0(16) |
| C(34)-C(33)-C(32) | 120.6(17) |
| C(34)-C(33)-H(33) | 119.7     |
| C(32)-C(33)-H(33) | 119.7     |
| C(33)-C(34)-C(35) | 122(2)    |
| C(33)-C(34)-H(34) | 119.0     |
| C(35)-C(34)-H(34) | 119.0     |
| O(9)-C(35)-C(34)  | 129.7(19) |
| O(9)-C(35)-C(36)  | 112(2)    |
| C(34)-C(35)-C(36) | 118.2(17) |
| C(37)-C(36)-C(35) | 119.1(16) |
| C(37)-C(36)-H(36) | 120.5     |
| C(35)-C(36)-H(36) | 120.5     |
| C(32)-C(37)-C(36) | 122.9(17) |
| C(32)-C(37)-H(37) | 118.6     |
| C(36)-C(37)-H(37) | 118.6     |
| C(43)-C(38)-O(9)  | 114(2)    |
| C(43)-C(38)-C(39) | 120(3)    |

|                       |           |
|-----------------------|-----------|
| O(9)-C(38)-C(39)      | 126(2)    |
| C(38)-C(39)-C(40)     | 114(2)    |
| C(38)-C(39)-H(39)     | 122.9     |
| C(40)-C(39)-H(39)     | 122.9     |
| C(41)-C(40)-C(39)     | 129(2)    |
| C(41)-C(40)-C(44)     | 115(2)    |
| C(39)-C(40)-C(44)     | 115.0(19) |
| C(42)-C(41)-C(40)     | 107(2)    |
| C(42)-C(41)-H(41)     | 126.7     |
| C(40)-C(41)-H(41)     | 126.7     |
| C(41)-C(42)-C(43)     | 131(2)    |
| C(41)-C(42)-H(42)     | 114.5     |
| C(43)-C(42)-H(42)     | 114.5     |
| C(38)-C(43)-O(10)#2   | 124(2)    |
| C(38)-C(43)-C(42)     | 118(2)    |
| O(10)#2-C(43)-C(42)   | 117(2)    |
| O(6)-C(48)-O(5)       | 130.8(15) |
| O(6)-C(48)-C(21)#3    | 116.3(17) |
| O(5)-C(48)-C(21)#3    | 112.7(17) |
| O(18)-C(49)-O(17)     | 124.8(17) |
| O(18)-C(49)-C(50)     | 121.5(16) |
| O(17)-C(49)-C(50)     | 113.6(16) |
| C(55)#4-C(50)-C(51)#4 | 117.9(17) |
| C(55)#4-C(50)-C(49)   | 124.9(19) |
| C(51)#4-C(50)-C(49)   | 117.1(17) |
| C(52)-C(51)-C(50)#4   | 122.6(18) |
| C(52)-C(51)-H(51)     | 118.7     |
| C(50)#4-C(51)-H(51)   | 118.7     |
| C(51)-C(52)-C(53)     | 113.7(19) |
| C(51)-C(52)-H(52)     | 123.1     |
| C(53)-C(52)-H(52)     | 123.1     |
| C(52)-C(53)-C(54)     | 126.3(17) |
| C(52)-C(53)-O(16)     | 110(2)    |
| C(54)-C(53)-O(16)     | 124(2)    |
| C(55)-C(54)-C(53)     | 114.6(19) |
| C(55)-C(54)-H(54)     | 122.7     |

|                     |           |
|---------------------|-----------|
| C(53)-C(54)-H(54)   | 122.7     |
| C(50)#4-C(55)-C(54) | 124.7(19) |
| C(50)#4-C(55)-H(55) | 117.7     |
| C(54)-C(55)-H(55)   | 117.7     |
| O(16)-C(56)-C(61)   | 125.5(19) |
| O(16)-C(56)-C(57)   | 125(2)    |
| C(61)-C(56)-C(57)   | 108(2)    |
| C(58)-C(57)-C(56)   | 134(3)    |
| C(58)-C(57)-H(57)   | 113.1     |
| C(56)-C(57)-H(57)   | 113.1     |
| C(57)-C(58)-C(59)   | 118(3)    |
| C(57)-C(58)-H(58)   | 120.8     |
| C(59)-C(58)-H(58)   | 120.8     |
| C(58)-C(59)-C(60)   | 115.9(18) |
| C(58)-C(59)-C(62)   | 121(2)    |
| C(60)-C(59)-C(62)   | 122.6(19) |
| C(61)-C(60)-C(59)   | 115(2)    |
| C(61)-C(60)-H(60)   | 122.5     |
| C(59)-C(60)-H(60)   | 122.5     |
| C(56)-C(61)-C(60)   | 128(2)    |
| C(56)-C(61)-O(15)   | 121.0(15) |
| C(60)-C(61)-O(15)   | 111(2)    |
| C(59)-C(62)-C(63)   | 112.3(16) |
| C(59)-C(62)-C(64)   | 108.9(16) |
| C(63)-C(62)-C(64)   | 103.2(17) |
| C(59)-C(62)-C(65)   | 109.8(17) |
| C(63)-C(62)-C(65)   | 109(2)    |
| C(64)-C(62)-C(65)   | 113.0(18) |
| C(67)-C(66)-C(71)   | 123.4(18) |
| C(67)-C(66)-O(15)   | 117(2)    |
| C(71)-C(66)-O(15)   | 119.5(18) |
| C(68)-C(67)-C(66)   | 117.7(18) |
| C(68)-C(67)-H(67)   | 121.2     |
| C(66)-C(67)-H(67)   | 121.2     |
| C(67)-C(68)-C(69)   | 120.7(17) |
| C(67)-C(68)-H(68)   | 119.6     |

|                     |           |
|---------------------|-----------|
| C(69)-C(68)-H(68)   | 119.6     |
| C(70)-C(69)-C(68)   | 119.2(18) |
| C(70)-C(69)-C(72)   | 118.7(19) |
| C(68)-C(69)-C(72)   | 121.9(19) |
| C(71)-C(70)-C(69)   | 120.6(18) |
| C(71)-C(70)-H(70)   | 119.7     |
| C(69)-C(70)-H(70)   | 119.7     |
| C(70)-C(71)-C(66)   | 118.2(18) |
| C(70)-C(71)-H(71)   | 120.9     |
| C(66)-C(71)-H(71)   | 120.9     |
| O(14)-C(72)-O(13)   | 124(2)    |
| O(14)-C(72)-C(69)   | 121.9(19) |
| O(13)-C(72)-C(69)   | 114(2)    |
| C(1)-O(1)-Zn(1)     | 131.3(11) |
| C(1)-O(2)-Zn(2)     | 127.4(9)  |
| C(8)-O(3)-C(5)      | 120.7(12) |
| C(18)-O(4)-C(9)     | 122.0(11) |
| C(48)-O(5)-Zn(4)    | 124.7(10) |
| C(48)-O(6)-Zn(3)    | 129.2(11) |
| C(31)-O(7)-Zn(3)    | 122.0(9)  |
| C(31)-O(8)-Zn(2)    | 125.0(10) |
| C(35)-O(9)-C(38)    | 119.0(17) |
| C(24)-O(10)-C(43)#2 | 117.5(13) |
| C(30)-O(11)-Zn(3)   | 127.5(11) |
| C(30)-O(12)-Zn(1)   | 122.1(10) |
| C(72)-O(13)-Zn(4)   | 127.3(13) |
| C(72)-O(14)-Zn(1)   | 131.7(14) |
| C(66)-O(15)-C(61)   | 121.4(13) |
| C(56)-O(16)-C(53)   | 119.7(17) |
| C(49)-O(17)-Zn(2)   | 126.5(10) |
| C(49)-O(18)-Zn(4)   | 133.3(12) |
| Zn(2)-O(19)-Zn(1)   | 107.9(5)  |
| Zn(2)-O(19)-Zn(4)   | 111.5(4)  |
| Zn(1)-O(19)-Zn(4)   | 109.6(5)  |
| Zn(2)-O(19)-Zn(3)   | 110.6(5)  |
| Zn(1)-O(19)-Zn(3)   | 110.0(4)  |

|                   |          |
|-------------------|----------|
| Zn(4)-O(19)-Zn(3) | 107.4(4) |
| O(14)-Zn(1)-O(1)  | 111.1(6) |
| O(14)-Zn(1)-O(12) | 101.4(6) |
| O(1)-Zn(1)-O(12)  | 113.5(5) |
| O(14)-Zn(1)-O(19) | 110.4(5) |
| O(1)-Zn(1)-O(19)  | 110.8(4) |
| O(12)-Zn(1)-O(19) | 109.1(4) |
| O(14)-Zn(1)-Zn(2) | 134.5(5) |
| O(1)-Zn(1)-Zn(2)  | 76.5(3)  |
| O(12)-Zn(1)-Zn(2) | 116.7(3) |
| O(19)-Zn(1)-Zn(2) | 35.6(3)  |
| O(19)-Zn(2)-O(8)  | 106.5(4) |
| O(19)-Zn(2)-O(2)  | 113.4(4) |
| O(8)-Zn(2)-O(2)   | 108.5(5) |
| O(19)-Zn(2)-O(17) | 111.1(4) |
| O(8)-Zn(2)-O(17)  | 109.9(5) |
| O(2)-Zn(2)-O(17)  | 107.3(4) |
| O(19)-Zn(2)-Zn(1) | 36.6(3)  |
| O(8)-Zn(2)-Zn(1)  | 113.7(3) |
| O(2)-Zn(2)-Zn(1)  | 77.5(3)  |
| O(17)-Zn(2)-Zn(1) | 131.7(3) |
| O(11)-Zn(3)-O(7)  | 123.1(5) |
| O(11)-Zn(3)-O(6)  | 94.8(4)  |
| O(7)-Zn(3)-O(6)   | 106.9(4) |
| O(11)-Zn(3)-O(19) | 110.2(5) |
| O(7)-Zn(3)-O(19)  | 109.3(4) |
| O(6)-Zn(3)-O(19)  | 111.4(5) |
| O(11)-Zn(3)-Zn(4) | 119.5(4) |
| O(7)-Zn(3)-Zn(4)  | 116.8(3) |
| O(6)-Zn(3)-Zn(4)  | 75.5(3)  |
| O(19)-Zn(3)-Zn(4) | 36.3(3)  |
| O(18)-Zn(4)-O(13) | 111.3(5) |
| O(18)-Zn(4)-O(5)  | 108.2(4) |
| O(13)-Zn(4)-O(5)  | 105.5(4) |
| O(18)-Zn(4)-O(19) | 108.7(4) |
| O(13)-Zn(4)-O(19) | 109.0(4) |

|                   |           |
|-------------------|-----------|
| O(5)-Zn(4)-O(19)  | 114.2(4)  |
| O(18)-Zn(4)-Zn(3) | 123.6(4)  |
| O(13)-Zn(4)-Zn(3) | 121.0(3)  |
| O(5)-Zn(4)-Zn(3)  | 77.8(3)   |
| O(19)-Zn(4)-Zn(3) | 36.4(3)   |
| C(46)-C(44)-C(47) | 108.6(17) |
| C(46)-C(44)-C(45) | 115.7(19) |
| C(47)-C(44)-C(45) | 111.5(16) |
| C(46)-C(44)-C(40) | 105.1(18) |
| C(47)-C(44)-C(40) | 102.9(16) |
| C(45)-C(44)-C(40) | 112.1(16) |

---

Symmetry transformations used to generate equivalent atoms:

#1  $-x+2, y+1/2, -z+3/2$  #2  $-x+2, -y+1, -z+1$  #3  $-x+2, y-1/2, -z+3/2$

#4  $-x+2, -y+1, -z+2$



**Table S10.** Anisotropic displacement parameters ( $\text{\AA}^2 \times 10^3$ ) for Compound **1**.  
The anisotropic displacement factor exponent takes the form:  $-2\pi^2 [ h^2 a^* 2U^{11} + \dots + 2 h k a^* b^* U^{12} ]$

|       | $U^{11}$ | $U^{22}$ | $U^{33}$ | $U^{23}$ | $U^{13}$ | $U^{12}$ |
|-------|----------|----------|----------|----------|----------|----------|
| C(1)  | 43(10)   | 67(12)   | 93(13)   | 21(10)   | 19(9)    | 14(9)    |
| C(2)  | 70(12)   | 85(13)   | 71(13)   | 22(10)   | 34(10)   | 15(10)   |
| C(3)  | 35(8)    | 80(12)   | 84(13)   | -31(10)  | 20(8)    | -9(9)    |
| C(4)  | 19(8)    | 89(12)   | 89(13)   | -12(9)   | -6(8)    | -20(8)   |
| C(5)  | 84(12)   | 47(10)   | 58(11)   | -3(8)    | 15(9)    | 7(9)     |
| C(6)  | 73(11)   | 80(12)   | 60(12)   | 1(10)    | 27(9)    | -7(10)   |
| C(7)  | 75(12)   | 70(11)   | 90(13)   | -7(9)    | 44(10)   | 2(9)     |
| C(8)  | 67(12)   | 53(9)    | 38(11)   | -24(8)   | -8(10)   | 12(8)    |
| C(9)  | 30(8)    | 118(13)  | 38(11)   | -41(10)  | 12(8)    | -21(8)   |
| C(10) | 49(10)   | 42(9)    | 130(15)  | -18(9)   | 11(10)   | -18(7)   |
| C(11) | 25(8)    | 53(9)    | 94(13)   | -30(9)   | 27(9)    | -19(7)   |
| C(12) | 66(11)   | 112(15)  | 82(15)   | 25(11)   | -2(10)   | 25(11)   |
| C(13) | 94(12)   | 84(12)   | 40(11)   | -4(8)    | 8(10)    | 26(10)   |
| C(14) | 46(10)   | 64(11)   | 82(12)   | -9(9)    | -1(9)    | -9(8)    |
| C(15) | 53(11)   | 126(17)  | 210(20)  | -49(17)  | -7(13)   | 9(11)    |
| C(16) | 47(11)   | 300(30)  | 160(20)  | -140(20) | 26(13)   | -43(15)  |
| C(17) | 30(11)   | 190(20)  | 460(50)  | 170(30)  | 58(18)   | 45(13)   |
| C(18) | 47(10)   | 61(11)   | 57(12)   | 9(9)     | -12(9)   | 11(8)    |
| C(19) | 50(9)    | 54(10)   | 80(12)   | -2(8)    | -4(9)    | 7(8)     |
| C(20) | 20(7)    | 67(10)   | 81(12)   | 0(9)     | -12(7)   | -10(7)   |
| C(21) | 21(7)    | 64(10)   | 72(11)   | -3(9)    | 3(8)     | -3(7)    |
| C(22) | 32(8)    | 86(12)   | 75(12)   | 7(9)     | -10(8)   | 7(8)     |
| C(23) | 61(10)   | 101(13)  | 14(8)    | -8(8)    | 5(7)     | 5(9)     |
| C(24) | 76(12)   | 86(14)   | 83(13)   | -1(10)   | 22(10)   | -29(11)  |
| C(25) | 104(15)  | 86(13)   | 135(18)  | -12(12)  | 62(13)   | 17(12)   |
| C(26) | 90(14)   | 123(18)  | 114(17)  | -16(13)  | 62(12)   | -12(13)  |
| C(27) | 95(14)   | 64(12)   | 60(12)   | 3(9)     | 19(10)   | -4(10)   |
| C(28) | 50(10)   | 90(13)   | 131(16)  | -33(11)  | 39(10)   | -18(10)  |
| C(29) | 93(14)   | 92(15)   | 83(14)   | -15(11)  | 39(10)   | -2(11)   |

|       |         |         |         |          |         |          |
|-------|---------|---------|---------|----------|---------|----------|
| C(30) | 31(9)   | 113(15) | 65(12)  | 21(11)   | 25(8)   | 16(10)   |
| C(31) | 93(14)  | 63(11)  | 23(10)  | -2(8)    | -18(9)  | -17(11)  |
| C(32) | 85(13)  | 62(11)  | 44(10)  | 1(9)     | 21(9)   | -8(9)    |
| C(33) | 87(13)  | 92(13)  | 75(13)  | -10(10)  | 45(10)  | -4(12)   |
| C(34) | 121(17) | 150(20) | 110(18) | -74(15)  | 69(14)  | -92(16)  |
| C(35) | 74(13)  | 121(17) | 46(12)  | 4(11)    | -12(10) | -35(13)  |
| C(36) | 170(20) | 54(11)  | 35(11)  | -14(8)   | 23(12)  | -13(13)  |
| C(37) | 110(14) | 77(13)  | 61(12)  | -7(10)   | 18(10)  | -6(11)   |
| C(38) | 160(20) | 170(20) | 65(15)  | -71(14)  | 55(16)  | -106(17) |
| C(39) | 94(15)  | 290(30) | 89(16)  | -129(17) | 13(13)  | -12(16)  |
| C(40) | 90(12)  | 205(14) | 131(15) | -46(13)  | 16(11)  | -32(11)  |
| C(41) | 96(11)  | 204(14) | 141(15) | -58(12)  | 21(11)  | -26(11)  |
| C(42) | 89(11)  | 203(15) | 152(15) | -50(13)  | 20(11)  | -25(12)  |
| C(43) | 34(9)   | 129(16) | 140(20) | -28(14)  | 44(12)  | -26(10)  |
| C(45) | 160(20) | 155(19) | 150(20) | -20(15)  | 68(16)  | -41(16)  |
| C(46) | 111(19) | 290(40) | 220(30) | 110(30)  | -80(20) | 10(20)   |
| C(47) | 170(20) | 148(19) | 123(19) | 52(15)   | 87(16)  | 22(16)   |
| C(48) | 26(9)   | 53(11)  | 119(18) | -32(11)  | 17(11)  | -20(8)   |
| C(49) | 72(13)  | 86(13)  | 58(12)  | 6(10)    | -8(11)  | 13(11)   |
| C(50) | 41(10)  | 95(14)  | 120(17) | -8(12)   | 40(11)  | -2(10)   |
| C(51) | 62(13)  | 105(16) | 180(20) | 50(15)   | 6(14)   | 49(12)   |
| C(52) | 83(15)  | 106(16) | 180(20) | 78(15)   | 59(16)  | 13(13)   |
| C(53) | 130(20) | 81(13)  | 110(19) | 13(13)   | 85(17)  | -29(13)  |
| C(54) | 114(16) | 117(17) | 75(15)  | -30(13)  | 30(13)  | -67(14)  |
| C(55) | 97(14)  | 89(12)  | 64(12)  | -7(9)    | 8(10)   | -65(11)  |
| C(56) | 61(13)  | 127(17) | 74(14)  | 11(11)   | -40(10) | -1(13)   |
| C(57) | 160(20) | 170(20) | 109(18) | 7(15)    | -13(18) | -110(20) |
| C(58) | 53(13)  | 200(20) | 180(30) | 21(19)   | -32(15) | -40(13)  |
| C(59) | 63(9)   | 160(14) | 110(11) | 88(11)   | 14(9)   | -3(9)    |
| C(60) | 61(8)   | 164(12) | 121(10) | 88(10)   | 12(8)   | 10(9)    |
| C(61) | 43(8)   | 153(13) | 114(11) | 86(10)   | 13(9)   | 4(10)    |
| C(62) | 96(12)  | 200(20) | 118(17) | 70(16)   | -17(13) | -33(13)  |
| C(63) | 112(18) | 250(30) | 210(30) | 120(20)  | 38(18)  | -7(18)   |
| C(64) | 90(15)  | 310(30) | 92(18)  | -34(18)  | 6(13)   | -36(18)  |
| C(65) | 128(19) | 320(40) | 120(20) | -70(20)  | 15(15)  | 130(20)  |
| C(66) | 71(13)  | 77(14)  | 98(17)  | -32(12)  | -5(12)  | -3(11)   |

|       |         |         |         |         |        |         |
|-------|---------|---------|---------|---------|--------|---------|
| C(67) | 82(13)  | 40(10)  | 116(16) | -7(10)  | 15(12) | 6(10)   |
| C(68) | 68(12)  | 64(12)  | 113(16) | -38(12) | 15(11) | -31(10) |
| C(69) | 113(16) | 62(12)  | 79(15)  | -1(11)  | 13(13) | -1(12)  |
| C(70) | 85(13)  | 89(13)  | 84(14)  | 21(11)  | 4(11)  | -18(11) |
| C(71) | 72(13)  | 114(16) | 88(16)  | 1(13)   | -1(12) | -22(12) |
| C(72) | 68(14)  | 120(20) | 102(19) | -63(15) | 31(13) | -45(14) |
| O(1)  | 55(7)   | 72(7)   | 128(10) | -6(6)   | 29(7)  | -14(6)  |
| O(2)  | 52(7)   | 62(7)   | 133(10) | -26(7)  | 7(6)   | -8(6)   |
| O(3)  | 84(8)   | 95(8)   | 60(7)   | 0(6)    | 7(6)   | 24(7)   |
| O(4)  | 57(7)   | 75(7)   | 71(8)   | -19(6)  | 3(6)   | -7(6)   |
| O(5)  | 39(6)   | 64(6)   | 87(8)   | -4(6)   | 21(5)  | 10(5)   |
| O(6)  | 63(7)   | 86(9)   | 79(9)   | 20(7)   | 25(6)  | -2(6)   |
| O(7)  | 91(8)   | 70(7)   | 76(8)   | -3(6)   | 32(7)  | 24(6)   |
| O(8)  | 89(8)   | 54(7)   | 98(10)  | -18(6)  | 19(7)  | 10(6)   |
| O(9)  | 98(10)  | 115(10) | 96(10)  | -37(8)  | 16(8)  | -70(9)  |
| O(10) | 75(8)   | 122(9)  | 109(10) | -14(7)  | 49(7)  | -50(7)  |
| O(11) | 79(8)   | 54(7)   | 123(10) | 4(7)    | 24(7)  | 1(6)    |
| O(12) | 63(7)   | 75(7)   | 131(10) | 0(7)    | 47(7)  | -20(6)  |
| O(13) | 66(7)   | 96(9)   | 101(9)  | -1(7)   | 24(6)  | -15(7)  |
| O(14) | 105(11) | 103(11) | 141(14) | 6(9)    | -3(10) | -11(9)  |
| O(15) | 100(9)  | 81(9)   | 107(10) | 28(7)   | 25(8)  | 36(8)   |
| O(16) | 86(9)   | 93(9)   | 116(11) | -17(8)  | 10(8)  | 2(7)    |
| O(17) | 56(7)   | 78(7)   | 98(9)   | -3(7)   | 25(6)  | -10(6)  |
| O(18) | 40(6)   | 80(7)   | 125(10) | 1(7)    | 9(6)   | 1(6)    |
| O(19) | 62(6)   | 71(7)   | 98(8)   | 1(6)    | 29(6)  | -6(5)   |
| Zn(1) | 49(1)   | 67(1)   | 99(2)   | -3(1)   | 21(1)  | -7(1)   |
| Zn(2) | 53(1)   | 63(1)   | 84(2)   | -4(1)   | 21(1)  | -5(1)   |
| Zn(3) | 51(1)   | 63(1)   | 90(2)   | 4(1)    | 13(1)  | -1(1)   |
| Zn(4) | 52(1)   | 69(1)   | 89(2)   | -4(1)   | 16(1)  | -7(1)   |
| C(44) | 200(30) | 125(18) | 130(20) | -10(14) | 67(18) | -44(16) |

---

Table S11. Atomic coordinates ( $\times 10^4$ ) and equivalent isotropic displacement parameters ( $\text{\AA}^2 \times 10^3$ ) for Compound **1**⊃**PX'**. U(eq) is defined as one third of the trace of the orthogonalized  $U^{ij}$  tensor.

|       | x         | y        | z        | U(eq)   |
|-------|-----------|----------|----------|---------|
| C(1)  | 6750(20)  | 9374(6)  | 3302(11) | 110(6)  |
| C(2)  | 7591(13)  | 9274(5)  | 3785(6)  | 122(6)  |
| C(3)  | 7225(12)  | 9081(6)  | 4213(8)  | 255(12) |
| C(4)  | 7995(17)  | 8953(6)  | 4633(6)  | 256(13) |
| C(5)  | 9130(16)  | 9019(5)  | 4626(6)  | 160(7)  |
| C(6)  | 9495(11)  | 9212(5)  | 4199(7)  | 136(7)  |
| C(7)  | 8726(15)  | 9340(4)  | 3778(6)  | 94(6)   |
| C(8)  | 10650(11) | 9088(6)  | 5266(6)  | 154(6)  |
| C(9)  | 11454(16) | 8804(4)  | 5166(6)  | 166(6)  |
| C(10) | 12581(14) | 8894(5)  | 5299(6)  | 156(5)  |
| C(11) | 12905(12) | 9268(6)  | 5533(6)  | 129(5)  |
| C(12) | 12102(18) | 9552(4)  | 5634(5)  | 128(7)  |
| C(13) | 10974(15) | 9462(5)  | 5500(6)  | 128(7)  |
| C(14) | 9200(20)  | 9643(10) | 5729(11) | 164(9)  |
| C(15) | 9280(40)  | 9449(12) | 6185(14) | 320(30) |
| C(16) | 8480(30)  | 9506(10) | 6548(9)  | 240(20) |
| C(17) | 7764(18)  | 9820(6)  | 6438(9)  | 85(5)   |
| C(18) | 7749(15)  | 10015(6) | 5972(8)  | 95(6)   |
| C(19) | 8450(20)  | 9915(9)  | 5617(9)  | 160(9)  |
| C(20) | 14200(20) | 9301(9)  | 5604(11) | 139(6)  |
| C(21) | 14593(18) | 9366(11) | 5104(10) | 216(16) |
| C(22) | 14350(20) | 9718(10) | 5885(11) | 196(9)  |
| C(23) | 14780(20) | 9094(16) | 5981(16) | 350(30) |
| C(24) | 6897(16)  | 11168(7) | 7791(10) | 66(5)   |
| C(25) | 7570(19)  | 11538(6) | 7811(8)  | 64(5)   |
| C(26) | 8290(16)  | 11634(5) | 8231(8)  | 61(5)   |
| C(27) | 8958(15)  | 11985(6) | 8260(8)  | 89(5)   |
| C(28) | 8845(17)  | 12256(7) | 7853(9)  | 100(5)  |

|        |           |           |           |         |
|--------|-----------|-----------|-----------|---------|
| C(29)  | 8070(19)  | 12181(7)  | 7427(9)   | 116(7)  |
| C(30)  | 7423(16)  | 11813(7)  | 7403(9)   | 96(6)   |
| C(31)  | 10000(30) | 12772(7)  | 8296(11)  | 111(6)  |
| C(32)  | 11170(30) | 12713(7)  | 8393(14)  | 150(9)  |
| C(33)  | 11740(20) | 12862(8)  | 8896(17)  | 147(11) |
| C(34)  | 11130(30) | 13053(8)  | 9242(13)  | 155(11) |
| C(35)  | 9990(20)  | 13083(6)  | 9160(10)  | 129(6)  |
| C(36)  | 9470(20)  | 12938(6)  | 8671(10)  | 119(5)  |
| C(37)  | 12980(30) | 12841(11) | 9005(16)  | 207(10) |
| C(38)  | 13260(30) | 12353(12) | 9076(14)  | 259(16) |
| C(39)  | 13400(20) | 13036(10) | 9516(13)  | 221(11) |
| C(40)  | 13580(20) | 13023(9)  | 8596(13)  | 211(11) |
| C(41)  | 2205(18)  | 8278(8)   | 6689(8)   | 101(5)  |
| C(42)  | 3297(18)  | 8226(6)   | 6867(8)   | 106(6)  |
| C(43)  | 3868(15)  | 8563(7)   | 7122(7)   | 98(5)   |
| C(44)  | 3385(19)  | 8930(7)   | 7202(8)   | 89(6)   |
| C(45)  | 2260(20)  | 8957(6)   | 7023(8)   | 104(7)  |
| C(46)  | 1643(17)  | 8626(9)   | 6793(9)   | 115(7)  |
| C(47)  | 3950(20)  | 9307(8)   | 7421(7)   | 84(6)   |
| C(48)  | 7245(13)  | 9841(8)   | 8771(10)  | 70(6)   |
| C(49)  | 8064(17)  | 9660(7)   | 9217(9)   | 91(5)   |
| C(50)  | 8678(14)  | 9328(6)   | 9105(8)   | 96(5)   |
| C(51)  | 9483(16)  | 9165(6)   | 9534(9)   | 105(6)  |
| C(52)  | 9525(18)  | 9351(8)   | 9994(10)  | 107(6)  |
| C(53)  | 8940(19)  | 9656(7)   | 10118(9)  | 114(6)  |
| C(54)  | 8175(16)  | 9822(6)   | 9714(9)   | 102(6)  |
| C(54A) | 7040(14)  | 9916(8)   | 6845(9)   | 76(6)   |
| C(55)  | 10774(15) | 8882(5)   | 10413(6)  | 120(8)  |
| C(56)  | 11924(16) | 8930(4)   | 10535(6)  | 152(6)  |
| C(57)  | 12622(11) | 8589(6)   | 10547(5)  | 147(6)  |
| C(58)  | 12170(14) | 8201(5)   | 10436(6)  | 139(6)  |
| C(59)  | 11021(15) | 8154(4)   | 10314(6)  | 162(7)  |
| C(60)  | 10323(11) | 8494(6)   | 10302(5)  | 113(7)  |
| C(61)  | 13180(20) | 7906(8)   | 10476(10) | 126(7)  |
| C(62)  | 12750(50) | 7472(10)  | 10335(17) | 400(40) |
| C(63)  | 13660(20) | 7895(13)  | 11010(10) | 270(20) |

|        |           |           |           |         |
|--------|-----------|-----------|-----------|---------|
| C(64)  | 13933(17) | 8037(9)   | 10079(10) | 188(12) |
| C(65)  | 8410(30)  | 8592(6)   | 10515(15) | 97(7)   |
| C(66)  | 8683(17)  | 8648(6)   | 11002(14) | 86(6)   |
| C(67)  | 7900(30)  | 8837(6)   | 11301(8)  | 83(6)   |
| C(68)  | 6790(20)  | 8934(6)   | 11079(12) | 74(6)   |
| C(69)  | 6528(16)  | 8835(6)   | 10571(15) | 82(5)   |
| C(70)  | 7310(30)  | 8664(6)   | 10254(8)  | 95(6)   |
| C(71)  | 3940(20)  | 10868(5)  | 8605(11)  | 74(7)   |
| C(72S) | 5050(30)  | 9404(18)  | 9339(17)  | 420(50) |
| C(73S) | 3250(50)  | 9319(16)  | 9560(20)  | 550(60) |
| C(74S) | 3560(30)  | 9727(11)  | 8784(15)  | 175(12) |
| C(75S) | -100(20)  | 10190(16) | 8331(14)  | 350(40) |
| C(76S) | -780(20)  | 10514(10) | 7636(15)  | 242(18) |
| C(77S) | 1150(20)  | 10284(7)  | 7733(8)   | 105(7)  |
| C(78S) | 4760(30)  | 2481(13)  | 7450(20)  | 410(40) |
| C(79S) | 3790(30)  | 2204(15)  | 7373(12)  | 250(20) |
| C(80S) | 2770(40)  | 2398(8)   | 7229(11)  | 228(18) |
| C(81S) | 1790(30)  | 2170(13)  | 7170(10)  | 223(15) |
| C(82S) | 1830(30)  | 1748(12)  | 7254(12)  | 197(15) |
| C(83S) | 700(30)   | 1462(10)  | 7242(13)  | 245(18) |
| C(84S) | 2900(40)  | 1592(11)  | 7418(11)  | 250(30) |
| C(85S) | 3940(50)  | 1782(15)  | 7480(30)  | 410(50) |
| N(1)   | 4020(30)  | 9543(9)   | 9284(13)  | 228(14) |
| N(2)   | 126(14)   | 10296(5)  | 7885(8)   | 106(5)  |
| O(1)   | 5769(10)  | 9280(4)   | 3348(4)   | 96(4)   |
| O(2)   | 7108(8)   | 9563(4)   | 2942(5)   | 75(3)   |
| O(3)   | 9631(17)  | 8897(7)   | 5180(8)   | 213(8)  |
| O(4)   | 9910(20)  | 9618(11)  | 5356(7)   | 350(20) |
| O(5)   | 6962(10)  | 9707(4)   | 7215(5)   | 93(5)   |
| O(6)   | 6514(10)  | 10265(4)  | 6750(4)   | 79(3)   |
| O(7)   | 6265(10)  | 11080(3)  | 7345(6)   | 81(4)   |
| O(8)   | 6914(9)   | 10955(4)  | 8187(5)   | 70(4)   |
| O(9)   | 9465(13)  | 12626(4)  | 7831(6)   | 133(5)  |
| O(10)  | 8298(12)  | 12943(4)  | 8565(7)   | 142(6)  |
| O(11)  | 5022(13)  | 9249(3)   | 7588(5)   | 90(4)   |
| O(12)  | 3420(11)  | 9620(5)   | 7451(6)   | 111(5)  |

|        |           |          |          |        |
|--------|-----------|----------|----------|--------|
| O(13)  | 7014(10)  | 9626(4)  | 8356(5)  | 75(4)  |
| O(14)  | 6840(10)  | 10189(4) | 8864(4)  | 75(4)  |
| O(15)  | 10217(11) | 9201(6)  | 10451(6) | 159(7) |
| O(16)  | 9092(14)  | 8408(4)  | 10157(5) | 128(5) |
| O(17)  | 3577(10)  | 10764(4) | 8149(6)  | 83(4)  |
| O(18)  | 4952(13)  | 10812(4) | 8834(5)  | 86(4)  |
| O(19)  | 1932(11)  | 10120(4) | 7969(6)  | 127(5) |
| O(20)  | 4156(10)  | 9895(4)  | 8537(6)  | 119(5) |
| O(100) | 5243(7)   | 10253(3) | 7751(3)  | 57(3)  |
| Zn(1)  | 5946(2)   | 9723(1)  | 7744(1)  | 81(1)  |
| Zn(2)  | 5492(2)   | 10567(1) | 7154(1)  | 78(1)  |
| Zn(3)  | 5862(2)   | 10532(1) | 8381(1)  | 78(1)  |
| Zn(4)  | 3579(2)   | 10185(1) | 7777(1)  | 88(1)  |

---

**Table S12.** Bond lengths [ $\text{\AA}$ ] and angles [ $^\circ$ ] for Compound **1DPX'**.

---

|              |         |
|--------------|---------|
| C(1)-O(2)    | 1.23(2) |
| C(1)-O(1)    | 1.25(2) |
| C(1)-C(2)    | 1.53(2) |
| C(2)-C(3)    | 1.3900  |
| C(2)-C(7)    | 1.3900  |
| C(3)-C(4)    | 1.3900  |
| C(4)-C(5)    | 1.3900  |
| C(5)-C(6)    | 1.3900  |
| C(5)-O(3)    | 1.52(2) |
| C(6)-C(7)    | 1.3900  |
| C(8)-O(3)    | 1.37(2) |
| C(8)-C(9)    | 1.3900  |
| C(8)-C(13)   | 1.3900  |
| C(8)-O(4)    | 1.97(3) |
| C(9)-C(10)   | 1.3900  |
| C(10)-C(11)  | 1.3900  |
| C(11)-C(12)  | 1.3900  |
| C(11)-C(20)  | 1.55(3) |
| C(12)-C(13)  | 1.3900  |
| C(13)-O(4)   | 1.38(2) |
| C(14)-C(19)  | 1.27(3) |
| C(14)-C(15)  | 1.33(3) |
| C(14)-O(4)   | 1.37(3) |
| C(15)-C(16)  | 1.45(4) |
| C(16)-C(17)  | 1.35(3) |
| C(17)-C(18)  | 1.35(2) |
| C(17)-C(54A) | 1.49(3) |
| C(18)-C(19)  | 1.37(3) |
| C(20)-C(23)  | 1.30(3) |
| C(20)-C(21)  | 1.44(3) |
| C(20)-C(22)  | 1.54(3) |
| C(24)-O(8)   | 1.23(2) |
| C(24)-O(7)   | 1.32(2) |
| C(24)-C(25)  | 1.45(2) |



|               |         |
|---------------|---------|
| C(25)-C(26)   | 1.33(2) |
| C(25)-C(30)   | 1.37(2) |
| C(26)-C(27)   | 1.39(2) |
| C(27)-C(28)   | 1.36(3) |
| C(28)-C(29)   | 1.36(2) |
| C(28)-O(9)    | 1.42(2) |
| C(29)-C(30)   | 1.43(2) |
| C(31)-C(36)   | 1.34(3) |
| C(31)-O(9)    | 1.37(2) |
| C(31)-C(32)   | 1.42(3) |
| C(32)-C(33)   | 1.46(4) |
| C(33)-C(34)   | 1.38(4) |
| C(33)-C(37)   | 1.49(4) |
| C(34)-C(35)   | 1.37(3) |
| C(35)-C(36)   | 1.41(3) |
| C(36)-O(10)   | 1.40(2) |
| C(37)-C(39)   | 1.48(4) |
| C(37)-C(40)   | 1.48(4) |
| C(37)-C(38)   | 1.63(4) |
| C(41)-C(46)   | 1.36(3) |
| C(41)-O(10)#1 | 1.37(2) |
| C(41)-C(42)   | 1.35(2) |
| C(42)-C(43)   | 1.41(2) |
| C(43)-C(44)   | 1.36(2) |
| C(44)-C(45)   | 1.37(2) |
| C(44)-C(47)   | 1.48(3) |
| C(45)-C(46)   | 1.40(2) |
| C(47)-O(12)   | 1.22(2) |
| C(47)-O(11)   | 1.32(2) |
| C(48)-O(14)   | 1.27(2) |
| C(48)-O(13)   | 1.27(2) |
| C(48)-C(49)   | 1.53(3) |
| C(49)-C(50)   | 1.36(2) |
| C(49)-C(54)   | 1.37(2) |
| C(50)-C(51)   | 1.47(2) |
| C(51)-C(52)   | 1.32(3) |

|               |           |
|---------------|-----------|
| C(52)-C(53)   | 1.28(3)   |
| C(52)-O(15)   | 1.43(2)   |
| C(53)-C(54)   | 1.40(2)   |
| C(54A)-O(5)   | 1.18(2)   |
| C(54A)-O(6)   | 1.31(2)   |
| C(55)-O(15)   | 1.249(19) |
| C(55)-C(56)   | 1.3900    |
| C(55)-C(60)   | 1.3900    |
| C(56)-C(57)   | 1.3900    |
| C(57)-C(58)   | 1.3900    |
| C(58)-C(59)   | 1.3900    |
| C(58)-C(61)   | 1.55(2)   |
| C(59)-C(60)   | 1.3900    |
| C(60)-O(16)   | 1.508(18) |
| C(61)-C(63)   | 1.42(3)   |
| C(61)-C(64)   | 1.51(3)   |
| C(61)-C(62)   | 1.53(4)   |
| C(65)-C(66)   | 1.26(2)   |
| C(65)-C(70)   | 1.43(3)   |
| C(65)-O(16)   | 1.44(2)   |
| C(66)-C(67)   | 1.44(2)   |
| C(67)-C(68)   | 1.42(3)   |
| C(68)-C(69)   | 1.34(2)   |
| C(68)-C(71)#2 | 1.43(3)   |
| C(69)-C(70)   | 1.44(2)   |
| C(71)-O(17)   | 1.24(2)   |
| C(71)-O(18)   | 1.29(2)   |
| C(71)-C(68)#2 | 1.43(3)   |
| C(72S)-N(1)   | 1.31(3)   |
| C(73S)-N(1)   | 1.45(4)   |
| C(74S)-O(20)  | 1.16(3)   |
| C(74S)-N(1)   | 1.46(4)   |
| C(75S)-N(2)   | 1.26(3)   |
| C(76S)-N(2)   | 1.38(3)   |
| C(77S)-O(19)  | 1.18(2)   |
| C(77S)-N(2)   | 1.34(3)   |

|                |           |
|----------------|-----------|
| C(78S)-C(79S)  | 1.47(4)   |
| C(79S)-C(80S)  | 1.3900    |
| C(79S)-C(85S)  | 1.41(6)   |
| C(80S)-C(81S)  | 1.3900    |
| C(81S)-C(82S)  | 1.3900    |
| C(82S)-C(84S)  | 1.41(4)   |
| C(82S)-C(83S)  | 1.65(4)   |
| C(84S)-C(85S)  | 1.3900    |
| O(1)-Zn(2)#3   | 1.923(11) |
| O(2)-Zn(4)#3   | 2.088(12) |
| O(5)-Zn(1)     | 1.953(13) |
| O(6)-Zn(2)     | 1.981(14) |
| O(7)-Zn(2)     | 1.944(13) |
| O(8)-Zn(3)     | 1.982(13) |
| O(10)-C(41)#4  | 1.37(2)   |
| O(11)-Zn(1)    | 1.915(13) |
| O(12)-Zn(4)    | 2.021(16) |
| O(13)-Zn(1)    | 1.922(13) |
| O(14)-Zn(3)    | 1.947(13) |
| O(17)-Zn(4)    | 2.113(15) |
| O(18)-Zn(3)    | 1.935(14) |
| O(19)-Zn(4)    | 2.126(12) |
| O(20)-Zn(4)    | 2.198(13) |
| O(100)-Zn(2)   | 1.903(9)  |
| O(100)-Zn(3)   | 1.918(9)  |
| O(100)-Zn(1)   | 1.927(9)  |
| O(100)-Zn(4)   | 2.032(9)  |
| Zn(1)-Zn(3)    | 3.112(3)  |
| Zn(1)-Zn(2)    | 3.152(3)  |
| Zn(2)-O(1)#3   | 1.923(11) |
| Zn(2)-Zn(3)    | 3.129(3)  |
| Zn(4)-O(2)#3   | 2.088(12) |
| O(2)-C(1)-O(1) | 129(2)    |
| O(2)-C(1)-C(2) | 117(2)    |
| O(1)-C(1)-C(2) | 114(2)    |

|                    |           |
|--------------------|-----------|
| C(3)-C(2)-C(7)     | 120.0     |
| C(3)-C(2)-C(1)     | 119.6(17) |
| C(7)-C(2)-C(1)     | 120.1(17) |
| C(2)-C(3)-C(4)     | 120.0     |
| C(5)-C(4)-C(3)     | 120.0     |
| C(6)-C(5)-C(4)     | 120.0     |
| C(6)-C(5)-O(3)     | 136.8(16) |
| C(4)-C(5)-O(3)     | 102.4(16) |
| C(7)-C(6)-C(5)     | 120.0     |
| C(6)-C(7)-C(2)     | 120.0     |
| O(3)-C(8)-C(9)     | 107.6(18) |
| O(3)-C(8)-C(13)    | 131.4(18) |
| C(9)-C(8)-C(13)    | 120.0     |
| O(3)-C(8)-O(4)     | 90.3(15)  |
| C(9)-C(8)-O(4)     | 160.6(13) |
| C(13)-C(8)-O(4)    | 44.6(12)  |
| C(10)-C(9)-C(8)    | 120.0     |
| C(11)-C(10)-C(9)   | 120.0     |
| C(10)-C(11)-C(12)  | 120.0     |
| C(10)-C(11)-C(20)  | 109.4(17) |
| C(12)-C(11)-C(20)  | 130.5(17) |
| C(11)-C(12)-C(13)  | 120.0     |
| O(4)-C(13)-C(12)   | 146(2)    |
| O(4)-C(13)-C(8)    | 91(2)     |
| C(12)-C(13)-C(8)   | 120.0     |
| C(19)-C(14)-C(15)  | 120(3)    |
| C(19)-C(14)-O(4)   | 112(3)    |
| C(15)-C(14)-O(4)   | 128(3)    |
| C(14)-C(15)-C(16)  | 122(3)    |
| C(17)-C(16)-C(15)  | 115(2)    |
| C(18)-C(17)-C(16)  | 118(2)    |
| C(18)-C(17)-C(54A) | 126(2)    |
| C(16)-C(17)-C(54A) | 116(2)    |
| C(17)-C(18)-C(19)  | 123(2)    |
| C(14)-C(19)-C(18)  | 120(3)    |
| C(23)-C(20)-C(21)  | 122(3)    |

|                   |           |
|-------------------|-----------|
| C(23)-C(20)-C(22) | 95(3)     |
| C(21)-C(20)-C(22) | 105(2)    |
| C(23)-C(20)-C(11) | 119(2)    |
| C(21)-C(20)-C(11) | 111(2)    |
| C(22)-C(20)-C(11) | 100(2)    |
| O(8)-C(24)-O(7)   | 123(2)    |
| O(8)-C(24)-C(25)  | 120(2)    |
| O(7)-C(24)-C(25)  | 118(2)    |
| C(26)-C(25)-C(30) | 118.1(19) |
| C(26)-C(25)-C(24) | 121.7(18) |
| C(30)-C(25)-C(24) | 120(2)    |
| C(25)-C(26)-C(27) | 123.1(18) |
| C(28)-C(27)-C(26) | 119.5(18) |
| C(29)-C(28)-C(27) | 119(2)    |
| C(29)-C(28)-O(9)  | 115(2)    |
| C(27)-C(28)-O(9)  | 126(2)    |
| C(28)-C(29)-C(30) | 119.8(19) |
| C(25)-C(30)-C(29) | 120(2)    |
| C(36)-C(31)-O(9)  | 124(3)    |
| C(36)-C(31)-C(32) | 120(3)    |
| O(9)-C(31)-C(32)  | 117(3)    |
| C(31)-C(32)-C(33) | 116(3)    |
| C(34)-C(33)-C(32) | 120(3)    |
| C(34)-C(33)-C(37) | 121(3)    |
| C(32)-C(33)-C(37) | 119(3)    |
| C(35)-C(34)-C(33) | 123(3)    |
| C(34)-C(35)-C(36) | 115(3)    |
| C(31)-C(36)-O(10) | 116(3)    |
| C(31)-C(36)-C(35) | 125(3)    |
| O(10)-C(36)-C(35) | 119(3)    |
| C(39)-C(37)-C(40) | 109(3)    |
| C(39)-C(37)-C(33) | 111(3)    |
| C(40)-C(37)-C(33) | 115(3)    |
| C(39)-C(37)-C(38) | 106(3)    |
| C(40)-C(37)-C(38) | 111(3)    |
| C(33)-C(37)-C(38) | 104(3)    |

|                     |           |
|---------------------|-----------|
| C(46)-C(41)-O(10)#1 | 124(2)    |
| C(46)-C(41)-C(42)   | 122(2)    |
| O(10)#1-C(41)-C(42) | 114(2)    |
| C(41)-C(42)-C(43)   | 117(2)    |
| C(44)-C(43)-C(42)   | 124.3(19) |
| C(43)-C(44)-C(45)   | 115(2)    |
| C(43)-C(44)-C(47)   | 127(2)    |
| C(45)-C(44)-C(47)   | 117(2)    |
| C(44)-C(45)-C(46)   | 122.7(19) |
| C(41)-C(46)-C(45)   | 118.0(19) |
| O(12)-C(47)-O(11)   | 127(2)    |
| O(12)-C(47)-C(44)   | 120(2)    |
| O(11)-C(47)-C(44)   | 113(2)    |
| O(14)-C(48)-O(13)   | 127.1(18) |
| O(14)-C(48)-C(49)   | 115(2)    |
| O(13)-C(48)-C(49)   | 118(2)    |
| C(50)-C(49)-C(54)   | 121(2)    |
| C(50)-C(49)-C(48)   | 117(2)    |
| C(54)-C(49)-C(48)   | 121(2)    |
| C(49)-C(50)-C(51)   | 117(2)    |
| C(52)-C(51)-C(50)   | 117(2)    |
| C(53)-C(52)-C(51)   | 128(3)    |
| C(53)-C(52)-O(15)   | 110(3)    |
| C(51)-C(52)-O(15)   | 122(2)    |
| C(52)-C(53)-C(54)   | 116(2)    |
| C(49)-C(54)-C(53)   | 121(2)    |
| O(5)-C(54A)-O(6)    | 124.0(19) |
| O(5)-C(54A)-C(17)   | 124(2)    |
| O(6)-C(54A)-C(17)   | 112(2)    |
| O(15)-C(55)-C(56)   | 114.9(17) |
| O(15)-C(55)-C(60)   | 124.9(16) |
| C(56)-C(55)-C(60)   | 120.0     |
| C(57)-C(56)-C(55)   | 120.0     |
| C(56)-C(57)-C(58)   | 120.0     |
| C(59)-C(58)-C(57)   | 120.0     |
| C(59)-C(58)-C(61)   | 134.5(15) |

|                      |           |
|----------------------|-----------|
| C(57)-C(58)-C(61)    | 105.5(16) |
| C(58)-C(59)-C(60)    | 120.0     |
| C(59)-C(60)-C(55)    | 120.0     |
| C(59)-C(60)-O(16)    | 115.7(13) |
| C(55)-C(60)-O(16)    | 124.3(13) |
| C(63)-C(61)-C(64)    | 117(2)    |
| C(63)-C(61)-C(58)    | 107(2)    |
| C(64)-C(61)-C(58)    | 108.7(19) |
| C(63)-C(61)-C(62)    | 107(3)    |
| C(64)-C(61)-C(62)    | 108(2)    |
| C(58)-C(61)-C(62)    | 108(3)    |
| C(66)-C(65)-C(70)    | 123(2)    |
| C(66)-C(65)-O(16)    | 127(3)    |
| C(70)-C(65)-O(16)    | 110(3)    |
| C(65)-C(66)-C(67)    | 120(2)    |
| C(68)-C(67)-C(66)    | 122(2)    |
| C(69)-C(68)-C(67)    | 115(2)    |
| C(69)-C(68)-C(71)#2  | 125(3)    |
| C(67)-C(68)-C(71)#2  | 120(3)    |
| C(68)-C(69)-C(70)    | 124(2)    |
| C(65)-C(70)-C(69)    | 116.0(19) |
| O(17)-C(71)-O(18)    | 126(2)    |
| O(17)-C(71)-C(68)#2  | 119(2)    |
| O(18)-C(71)-C(68)#2  | 115(2)    |
| O(20)-C(74S)-N(1)    | 119(3)    |
| O(19)-C(77S)-N(2)    | 125(2)    |
| C(80S)-C(79S)-C(85S) | 126(2)    |
| C(80S)-C(79S)-C(78S) | 115(4)    |
| C(85S)-C(79S)-C(78S) | 119(4)    |
| C(81S)-C(80S)-C(79S) | 120.0     |
| C(80S)-C(81S)-C(82S) | 120.0     |
| C(84S)-C(82S)-C(81S) | 114(2)    |
| C(84S)-C(82S)-C(83S) | 122(4)    |
| C(81S)-C(82S)-C(83S) | 123(3)    |
| C(85S)-C(84S)-C(82S) | 131(4)    |
| C(84S)-C(85S)-C(79S) | 109(5)    |

|                     |           |
|---------------------|-----------|
| C(72S)-N(1)-C(74S)  | 119(3)    |
| C(72S)-N(1)-C(73S)  | 116(3)    |
| C(74S)-N(1)-C(73S)  | 117(4)    |
| C(75S)-N(2)-C(77S)  | 125(2)    |
| C(75S)-N(2)-C(76S)  | 108(2)    |
| C(77S)-N(2)-C(76S)  | 125(2)    |
| C(1)-O(1)-Zn(2)#3   | 123.4(14) |
| C(1)-O(2)-Zn(4)#3   | 136.2(13) |
| C(8)-O(3)-C(5)      | 105.5(16) |
| C(14)-O(4)-C(13)    | 118.6(18) |
| C(14)-O(4)-C(8)     | 118(2)    |
| C(13)-O(4)-C(8)     | 44.9(10)  |
| C(54A)-O(5)-Zn(1)   | 132.1(13) |
| C(54A)-O(6)-Zn(2)   | 131.0(12) |
| C(24)-O(7)-Zn(2)    | 127.4(13) |
| C(24)-O(8)-Zn(3)    | 131.5(13) |
| C(31)-O(9)-C(28)    | 116.6(17) |
| C(41)#4-O(10)-C(36) | 118.0(16) |
| C(47)-O(11)-Zn(1)   | 118.1(12) |
| C(47)-O(12)-Zn(4)   | 140.3(14) |
| C(48)-O(13)-Zn(1)   | 129.9(12) |
| C(48)-O(14)-Zn(3)   | 127.3(13) |
| C(55)-O(15)-C(52)   | 119(2)    |
| C(65)-O(16)-C(60)   | 113.1(19) |
| C(71)-O(17)-Zn(4)   | 130.4(12) |
| C(71)-O(18)-Zn(3)   | 111.7(14) |
| C(77S)-O(19)-Zn(4)  | 123.1(16) |
| C(74S)-O(20)-Zn(4)  | 123(2)    |
| Zn(2)-O(100)-Zn(3)  | 110.0(4)  |
| Zn(2)-O(100)-Zn(1)  | 110.8(4)  |
| Zn(3)-O(100)-Zn(1)  | 108.1(4)  |
| Zn(2)-O(100)-Zn(4)  | 110.5(4)  |
| Zn(3)-O(100)-Zn(4)  | 107.4(4)  |
| Zn(1)-O(100)-Zn(4)  | 110.0(4)  |
| O(11)-Zn(1)-O(13)   | 110.3(6)  |
| O(11)-Zn(1)-O(100)  | 118.6(5)  |



|                     |          |
|---------------------|----------|
| O(13)-Zn(1)-O(100)  | 112.8(5) |
| O(11)-Zn(1)-O(5)    | 103.7(5) |
| O(13)-Zn(1)-O(5)    | 98.7(5)  |
| O(100)-Zn(1)-O(5)   | 110.6(5) |
| O(11)-Zn(1)-Zn(3)   | 137.1(4) |
| O(13)-Zn(1)-Zn(3)   | 76.9(4)  |
| O(100)-Zn(1)-Zn(3)  | 35.8(3)  |
| O(5)-Zn(1)-Zn(3)    | 117.3(4) |
| O(11)-Zn(1)-Zn(2)   | 122.9(4) |
| O(13)-Zn(1)-Zn(2)   | 126.3(4) |
| O(100)-Zn(1)-Zn(2)  | 34.4(3)  |
| O(5)-Zn(1)-Zn(2)    | 76.9(4)  |
| Zn(3)-Zn(1)-Zn(2)   | 59.92(6) |
| O(100)-Zn(2)-O(1)#3 | 118.9(5) |
| O(100)-Zn(2)-O(7)   | 112.4(5) |
| O(1)#3-Zn(2)-O(7)   | 104.9(5) |
| O(100)-Zn(2)-O(6)   | 109.6(5) |
| O(1)#3-Zn(2)-O(6)   | 105.6(5) |
| O(7)-Zn(2)-O(6)     | 104.3(5) |
| O(100)-Zn(2)-Zn(3)  | 35.2(3)  |
| O(1)#3-Zn(2)-Zn(3)  | 132.7(4) |
| O(7)-Zn(2)-Zn(3)    | 77.2(4)  |
| O(6)-Zn(2)-Zn(3)    | 119.8(4) |
| O(100)-Zn(2)-Zn(1)  | 34.9(3)  |
| O(1)#3-Zn(2)-Zn(1)  | 128.2(4) |
| O(7)-Zn(2)-Zn(1)    | 125.6(4) |
| O(6)-Zn(2)-Zn(1)    | 74.8(4)  |
| Zn(3)-Zn(2)-Zn(1)   | 59.41(6) |
| O(100)-Zn(3)-O(18)  | 122.9(5) |
| O(100)-Zn(3)-O(14)  | 113.6(5) |
| O(18)-Zn(3)-O(14)   | 103.4(6) |
| O(100)-Zn(3)-O(8)   | 107.8(4) |
| O(18)-Zn(3)-O(8)    | 105.1(5) |
| O(14)-Zn(3)-O(8)    | 101.8(5) |
| O(100)-Zn(3)-Zn(1)  | 36.0(3)  |
| O(18)-Zn(3)-Zn(1)   | 141.1(4) |

|                     |          |
|---------------------|----------|
| O(14)-Zn(3)-Zn(1)   | 77.9(4)  |
| O(8)-Zn(3)-Zn(1)    | 112.8(3) |
| O(100)-Zn(3)-Zn(2)  | 34.9(3)  |
| O(18)-Zn(3)-Zn(2)   | 125.1(4) |
| O(14)-Zn(3)-Zn(2)   | 131.0(4) |
| O(8)-Zn(3)-Zn(2)    | 74.3(4)  |
| Zn(1)-Zn(3)-Zn(2)   | 60.67(6) |
| O(100)-Zn(4)-O(12)  | 97.2(5)  |
| O(100)-Zn(4)-O(2)#3 | 101.8(4) |
| O(12)-Zn(4)-O(2)#3  | 89.2(5)  |
| O(100)-Zn(4)-O(17)  | 88.8(4)  |
| O(12)-Zn(4)-O(17)   | 173.7(5) |
| O(2)#3-Zn(4)-O(17)  | 91.5(5)  |
| O(100)-Zn(4)-O(19)  | 168.5(5) |
| O(12)-Zn(4)-O(19)   | 88.1(6)  |
| O(2)#3-Zn(4)-O(19)  | 88.5(5)  |
| O(17)-Zn(4)-O(19)   | 85.7(5)  |
| O(100)-Zn(4)-O(20)  | 83.1(4)  |
| O(12)-Zn(4)-O(20)   | 88.7(5)  |
| O(2)#3-Zn(4)-O(20)  | 174.9(5) |
| O(17)-Zn(4)-O(20)   | 90.0(5)  |
| O(19)-Zn(4)-O(20)   | 86.7(5)  |

---

Symmetry transformations used to generate equivalent atoms:

#1  $-x+1, y-1/2, -z+3/2$  #2  $-x+1, -y+2, -z+2$  #3  $-x+1, -y+2, -z+1$

#4  $-x+1, y+1/2, -z+3/2$

**Table S13.** Anisotropic displacement parameters ( $\text{\AA}^2 \times 10^3$ ) for Compound **1-DPX'**. The anisotropic displacement factor exponent takes the form:  $-2\pi^2 [ h^2 a^{*2} U^{11} + \dots + 2 h k a^* b^* U^{12} ]$

|       | $U^{11}$ | $U^{22}$ | $U^{33}$ | $U^{23}$ | $U^{13}$ | $U^{12}$ |
|-------|----------|----------|----------|----------|----------|----------|
| C(1)  | 67(17)   | 85(13)   | 168(19)  | 63(12)   | -24(13)  | -15(11)  |
| C(2)  | 79(17)   | 97(12)   | 181(19)  | 69(12)   | -20(12)  | -24(11)  |
| C(3)  | 231(17)  | 260(17)  | 262(18)  | 67(14)   | -7(14)   | -23(14)  |
| C(4)  | 241(15)  | 260(15)  | 259(16)  | 45(10)   | 10(10)   | -17(10)  |
| C(5)  | 141(10)  | 173(11)  | 157(11)  | 1(9)     | -7(9)    | -23(9)   |
| C(6)  | 111(12)  | 172(13)  | 124(12)  | -14(11)  | 8(11)    | -26(11)  |
| C(7)  | 74(15)   | 112(15)  | 95(15)   | -3(12)   | 6(13)    | 20(13)   |
| C(8)  | 154(6)   | 154(6)   | 154(6)   | 0(1)     | 21(1)    | 0(1)     |
| C(9)  | 165(9)   | 170(8)   | 161(8)   | -15(7)   | 18(7)    | -7(7)    |
| C(10) | 156(6)   | 157(6)   | 156(6)   | 0(1)     | 22(1)    | 0(1)     |
| C(11) | 120(9)   | 142(9)   | 128(9)   | 8(8)     | 31(9)    | -7(9)    |
| C(12) | 118(19)  | 127(18)  | 139(18)  | -5(15)   | 12(15)   | -30(16)  |
| C(13) | 128(7)   | 128(7)   | 128(7)   | 0(1)     | 18(2)    | 0(1)     |
| C(14) | 150(20)  | 270(30)  | 86(14)   | -2(18)   | 51(17)   | 107(16)  |
| C(15) | 440(60)  | 410(60)  | 130(30)  | 110(30)  | 100(30)  | 350(50)  |
| C(16) | 340(40)  | 330(40)  | 78(17)   | 80(20)   | 100(20)  | 270(40)  |
| C(17) | 85(6)    | 85(6)    | 84(6)    | 0(1)     | 12(1)    | 0(1)     |
| C(18) | 85(14)   | 106(15)  | 95(15)   | 12(13)   | 16(13)   | 0(12)    |
| C(19) | 140(20)  | 260(30)  | 84(13)   | -4(17)   | 46(16)   | 95(16)   |
| C(20) | 115(11)  | 163(12)  | 143(12)  | 19(11)   | 29(12)   | -4(12)   |
| C(21) | 85(17)   | 410(50)  | 160(20)  | 60(30)   | 50(17)   | -20(20)  |
| C(22) | 134(16)  | 250(20)  | 205(19)  | 5(18)    | 18(16)   | -20(18)  |
| C(23) | 120(20)  | 580(80)  | 370(50)  | 330(60)  | 60(30)   | 90(40)   |
| C(24) | 43(13)   | 70(20)   | 90(20)   | -14(16)  | 20(15)   | -15(14)  |
| C(25) | 83(15)   | 52(15)   | 59(15)   | 7(14)    | 17(13)   | -18(14)  |
| C(26) | 60(12)   | 56(14)   | 63(14)   | -6(11)   | -6(12)   | -15(11)  |
| C(27) | 71(10)   | 89(16)   | 98(16)   | 3(10)    | -23(12)  | 1(12)    |
| C(28) | 79(11)   | 102(18)  | 110(16)  | 0(11)    | -22(13)  | 1(12)    |
| C(29) | 127(18)  | 114(19)  | 106(17)  | 53(14)   | 13(15)   | -17(16)  |

|        |          |         |         |         |         |         |
|--------|----------|---------|---------|---------|---------|---------|
| C(30)  | 100(10)  | 93(10)  | 94(10)  | -1(9)   | 14(8)   | -20(9)  |
| C(31)  | 106(9)   | 94(9)   | 127(10) | 6(8)    | -9(8)   | -12(8)  |
| C(32)  | 130(30)  | 79(17)  | 240(30) | 23(19)  | 30(20)  | -16(17) |
| C(33)  | 80(20)   | 76(19)  | 270(40) | -40(20) | -40(30) | -6(15)  |
| C(34)  | 110(30)  | 110(20) | 220(30) | 0(20)   | -80(20) | 3(18)   |
| C(35)  | 129(13)  | 92(11)  | 154(14) | 4(11)   | -26(12) | -6(11)  |
| C(36)  | 114(11)  | 91(10)  | 140(12) | 5(9)    | -26(10) | -9(9)   |
| C(37)  | 132(19)  | 210(20) | 260(30) | 30(20)  | -33(19) | -28(17) |
| C(38)  | 249(18)  | 251(18) | 273(18) | 7(11)   | 22(10)  | 2(11)   |
| C(39)  | 140(20)  | 240(20) | 260(30) | 20(20)  | -50(20) | -20(19) |
| C(40)  | 130(19)  | 220(20) | 270(30) | 40(20)  | 4(19)   | -41(18) |
| C(41)  | 78(13)   | 57(12)  | 157(15) | -10(11) | -28(13) | -3(17)  |
| C(42)  | 80(12)   | 65(11)  | 161(15) | -10(11) | -27(13) | -1(15)  |
| C(43)  | 52(13)   | 87(18)  | 149(13) | 25(13)  | -5(10)  | 23(11)  |
| C(44)  | 41(14)   | 80(19)  | 142(13) | 30(14)  | -8(10)  | 22(12)  |
| C(45)  | 120(20)  | 40(16)  | 149(18) | -11(13) | 2(15)   | 13(15)  |
| C(46)  | 88(17)   | 69(17)  | 180(20) | -15(15) | -15(15) | 15(18)  |
| C(47)  | 90(20)   | 60(19)  | 99(15)  | 1(13)   | -7(14)  | -20(20) |
| C(48)  | 24(12)   | 77(19)  | 102(19) | 60(18)  | -13(14) | -13(12) |
| C(49)  | 65(13)   | 120(16) | 91(12)  | 45(14)  | 25(11)  | 10(11)  |
| C(50)  | 67(13)   | 131(16) | 94(11)  | 45(13)  | 23(10)  | 26(10)  |
| C(51)  | 91(10)   | 112(10) | 115(10) | 14(9)   | 25(9)   | 20(8)   |
| C(52)  | 95(10)   | 115(10) | 106(9)  | 26(9)   | -3(8)   | -14(8)  |
| C(53)  | 111(12)  | 120(13) | 104(11) | 27(11)  | -13(11) | -27(11) |
| C(54)  | 94(16)   | 106(16) | 96(17)  | 31(14)  | -21(14) | 0(12)   |
| C(54A) | 42(13)   | 90(19)  | 89(19)  | -5(16)  | -11(14) | 28(13)  |
| C(55)  | 99(11)   | 135(12) | 129(11) | 3(9)    | 30(9)   | 10(9)   |
| C(56)  | 156(14)  | 175(15) | 133(11) | 37(12)  | 44(12)  | 22(12)  |
| C(57)  | 152(11)  | 166(12) | 133(9)  | 28(11)  | 53(9)   | 21(10)  |
| C(58)  | 138(9)   | 158(10) | 128(8)  | 12(9)   | 44(8)   | 0(8)    |
| C(59)  | 162(7)   | 162(7)  | 161(7)  | 0(1)    | 22(1)   | 0(1)    |
| C(60)  | 126(11)  | 103(10) | 110(10) | -6(8)   | 19(9)   | 33(9)   |
| C(61)  | 128(11)  | 122(11) | 125(11) | -11(9)  | 11(9)   | 10(9)   |
| C(62)  | 770(110) | 140(30) | 360(60) | 60(30)  | 310(70) | 160(50) |
| C(63)  | 140(20)  | 540(70) | 120(20) | 10(30)  | 8(18)   | 160(30) |
| C(64)  | 96(17)   | 300(40) | 180(20) | 40(20)  | 38(17)  | 70(20)  |

|        |          |          |          |         |          |          |
|--------|----------|----------|----------|---------|----------|----------|
| C(65)  | 130(30)  | 87(15)   | 90(20)   | 10(15)  | 50(20)   | 22(14)   |
| C(66)  | 95(18)   | 93(15)   | 73(18)   | 24(13)  | 24(18)   | 27(14)   |
| C(67)  | 120(20)  | 61(13)   | 75(15)   | -4(12)  | 40(20)   | -8(13)   |
| C(68)  | 80(30)   | 88(15)   | 50(20)   | 10(15)  | -2(18)   | -17(16)  |
| C(69)  | 80(16)   | 76(14)   | 90(20)   | 11(13)  | 30(20)   | 19(13)   |
| C(70)  | 120(20)  | 72(14)   | 94(17)   | -11(13) | 10(20)   | -7(13)   |
| C(71)  | 100(20)  | 56(13)   | 80(20)   | 3(14)   | 80(20)   | 17(14)   |
| C(72S) | 120(30)  | 780(110) | 380(60)  | 460(70) | 70(30)   | 30(40)   |
| C(73S) | 640(100) | 490(80)  | 640(100) | 430(80) | 580(90)  | 380(70)  |
| C(75S) | 110(20)  | 730(110) | 230(40)  | 260(50) | 50(30)   | 110(40)  |
| C(76S) | 72(19)   | 280(40)  | 360(50)  | 80(30)  | -30(20)  | 40(20)   |
| C(78S) | 190(40)  | 360(60)  | 630(100) | -20(60) | -120(50) | -130(40) |
| C(79S) | 180(40)  | 400(80)  | 150(30)  | -40(40) | -50(30)  | 50(50)   |
| C(80S) | 170(40)  | 210(40)  | 290(40)  | 20(30)  | -10(30)  | -70(40)  |
| C(81S) | 220(50)  | 200(40)  | 240(40)  | 10(30)  | 10(30)   | 90(40)   |
| C(82S) | 280(50)  | 110(30)  | 210(30)  | 0(20)   | 40(30)   | 50(30)   |
| C(83S) | 350(50)  | 170(30)  | 240(40)  | -20(20) | 100(30)  | -90(30)  |
| C(84S) | 440(70)  | 200(40)  | 150(30)  | 80(30)  | 140(40)  | 200(50)  |
| C(85S) | 370(80)  | 220(50)  | 710(140) | 80(60)  | 270(90)  | -10(50)  |
| N(1)   | 200(30)  | 260(30)  | 250(30)  | 130(20) | 150(30)  | 90(20)   |
| N(2)   | 61(14)   | 149(15)  | 109(14)  | 17(11)  | 16(12)   | -1(11)   |
| O(1)   | 55(9)    | 112(10)  | 110(9)   | 49(7)   | -23(8)   | -19(8)   |
| O(2)   | 41(7)    | 79(8)    | 102(9)   | -2(7)   | -5(7)    | 1(6)     |
| O(3)   | 196(11)  | 222(11)  | 211(11)  | 50(9)   | -13(9)   | -34(9)   |
| O(4)   | 300(30)  | 650(60)  | 93(13)   | 60(20)  | 45(16)   | 340(40)  |
| O(5)   | 98(10)   | 108(11)  | 76(9)    | 39(8)   | 24(8)    | 37(8)    |
| O(6)   | 64(8)    | 110(10)  | 62(8)    | 4(7)    | 7(6)     | -4(8)    |
| O(7)   | 75(9)    | 75(9)    | 90(9)    | 14(7)   | 3(8)     | -22(7)   |
| O(8)   | 62(8)    | 74(9)    | 74(9)    | 10(7)   | 8(7)     | -20(6)   |
| O(9)   | 151(13)  | 74(10)   | 167(14)  | 28(9)   | -2(11)   | -52(9)   |
| O(10)  | 100(13)  | 69(10)   | 242(17)  | 28(10)  | -31(11)  | -11(9)   |
| O(11)  | 66(9)    | 64(9)    | 135(10)  | 6(7)    | -9(8)    | 5(8)     |
| O(12)  | 75(10)   | 54(10)   | 194(15)  | -6(9)   | -15(9)   | 4(8)     |
| O(13)  | 58(8)    | 88(10)   | 77(9)    | 13(8)   | -4(7)    | 10(7)    |
| O(14)  | 78(9)    | 61(8)    | 82(9)    | 17(7)   | -9(7)    | 9(7)     |
| O(15)  | 94(11)   | 213(17)  | 165(14)  | 107(14) | -1(10)   | 5(11)    |

|        |         |         |         |         |        |       |
|--------|---------|---------|---------|---------|--------|-------|
| O(16)  | 185(15) | 102(10) | 109(11) | 7(9)    | 66(11) | 9(10) |
| O(17)  | 97(10)  | 84(9)   | 70(9)   | -1(8)   | 24(9)  | 28(7) |
| O(18)  | 65(9)   | 95(10)  | 103(11) | 8(7)    | 25(9)  | 13(8) |
| O(19)  | 66(9)   | 139(12) | 182(13) | 100(11) | 40(9)  | 15(8) |
| O(20)  | 68(8)   | 107(10) | 183(13) | 66(10)  | 18(9)  | 12(7) |
| O(100) | 32(6)   | 64(7)   | 75(7)   | 15(5)   | 6(5)   | 4(5)  |
| Zn(1)  | 61(2)   | 80(2)   | 100(2)  | 16(1)   | 5(1)   | 5(1)  |
| Zn(2)  | 58(2)   | 85(2)   | 90(2)   | 11(1)   | 0(1)   | -3(1) |
| Zn(3)  | 60(2)   | 84(2)   | 90(2)   | 12(1)   | 11(1)  | 0(1)  |
| Zn(4)  | 52(2)   | 84(2)   | 128(2)  | 14(1)   | 16(1)  | 0(1)  |

---

## **References:**

- (S1) [http://www.chemsystems.com/about/cs/news/items/PERP%200910\\_8\\_Xylenes.cfm](http://www.chemsystems.com/about/cs/news/items/PERP%200910_8_Xylenes.cfm)
- (S2) *SAINTE Plus*, (Version 7.03); Bruker AXS Inc.: Madison, WI, **2004**.
- (S3) G. M. Sheldrick, *SHELXTL, Reference Manual*: version 5.1: Bruker AXS; Madison, WI, **1997**.
- (S4) G. M. Sheldrick, *Acta Crystallogr. Sect. A* **2008**, 112-122.
- (S5) WINGX version 1.80.05 Louis Farrugia, University of Glasgow.
- (S6) A. L. Spek, PLATON, *A Multipurpose Crystallographic Tool*, Utrecht University, Utrecht, The Netherlands, **2005**.
